# Supplementary material for: The World of Cyclic Dinucleotides in Bacterial Behavior
Source: Preprints.org preprint supplement (doi:10.20944/preprints202001.0120.v1), 2020-01-12
Supplement: Supplementary file 1 [file supplementary]

## Sheet: Description
The world of cyclic dinucleotides in bacterial behavior
Purificação Aline Dias1, Azevedo Nathalia1, Araujo Gabriel Guarany de1, de Souza Robson Francisco1 and Guzzo Cristiane Rodrigues1*.
This file details the distribution of di-nucleotide cyclases across all domains of life
Description of each sheet in this workbook
Spreadsheet	Description
domain	Number of proteins, genes and assemblies of DAC (DisA_N, PF02457), GGDEF (PF00990), GGDEF_2 (PF17853) and SMODS (SMODS, PF18144) homologs on each domains of life (eukaryotes, bacteria and archaea) and in viruses
phylum	Number of proteins, genes and assemblies for homologs of di-nucleotide synthases throughout each recognized phyla in our sample of complete genomes
class	Number of di-nucleotide synthases for the taxonomic rank class in our sample of complete genomes
order	Number of di-nucleotide synthases for the taxonomic rank of order in our sample of complete genomes
genus	Number of di-nucleotide synthases for the taxonomic rank genus in our sample of complete genomes
Description of all columns
DAC	Number of genomes with one or more homologs of the cyclic di-AMP-nucletide synthase (PFAM: PF02457, DisA_N)
GGDEF	Number of genomes with at least one GGDEF (PFAM: PF00990) homologous gene
SMODS	Number of genomes harboring genes that are members of the SMODS family (PFAM: PF18144)
class	NCBI's taxonomic rank class (from on NCBI taxonomy database)
domain	The domain of life (Eukaryote, Bacteria or Archaea) or Viuses, if the genome analyzed was sampled from a virus
family	NCBI's taxonomic rank family (from on NCBI taxonomy database)
genomes	Number of genomes of a given clade included in this analysis
genus	NCBI's taxonomic rank genus (from on NCBI taxonomy database)
loci	Total number of genes homologous to cyclic di-nucleotide synthases in the clade
name	NCBI's taxonomic database scientific name of the organim
nucleotide	Number of contigs in each genome
order	NCBI's taxonomic rank order (from on NCBI taxonomy database)
phylum	NCBI's taxonomic rank phylum (from on NCBI taxonomy database)
proteins	Total number of proteins homologous to cyclic di-nucleotide synthases in the clade
species	NCBI's taxonomic rank species (from on NCBI taxonomy database)
taxid	NCBI's taxonomic database ID
dac_n_ggdef	Number of genomes with members of the DAC and GGDEF families

## Sheet: domain
domain	genomes	dac_n_ggdef	GGDEF	DAC	SMODS	loci	proteins
Archaea	1015	29	106	872	131	1344	1344
Bacteria	170890	51157	146462	75047	22631	2248127	2244839
Eukaryota	130	2	62	9	65	325	327
Viruses	7	0	7	0	0	7	7

## Sheet: phylum
domain	kingdom	phylum	genomes	dac_n_ggdef	GGDEF	DAC	SMODS	loci	proteins
Archaea	no rank	Candidatus Aenigmarchaeota	5	1	4	2	0	6	6
Archaea	no rank	Candidatus Bathyarchaeota	8	0	4	3	1	11	11
Archaea	no rank	Candidatus Diapherotrites	4	0	4	0	0	6	6
Archaea	no rank	Candidatus Geothermarchaeota	1	0	1	0	0	1	1
Archaea	no rank	Candidatus Heimdallarchaeota	3	0	0	0	3	3	3
Archaea	no rank	Candidatus Lokiarchaeota	3	0	0	1	2	4	4
Archaea	no rank	Candidatus Micrarchaeota	13	0	11	0	2	13	13
Archaea	no rank	Candidatus Thorarchaeota	2	1	2	1	0	3	3
Archaea	no rank	Candidatus Woesearchaeota	30	4	27	6	3	52	52
Archaea	no rank	Crenarchaeota	39	0	2	1	36	39	39
Archaea	no rank	Euryarchaeota	856	17	38	823	68	1123	1123
Archaea	no rank	Nanoarchaeota	1	0	0	1	0	1	1
Archaea	no rank	Thaumarchaeota	1	0	0	1	0	1	1
Archaea	no rank	no rank	49	6	13	33	16	81	81
Bacteria	no rank	Abditibacteriota	1	1	1	1	0	22	22
Bacteria	no rank	Acidobacteria	326	175	320	181	18	3470	3470
Bacteria	no rank	Actinobacteria	16822	13531	16349	13918	1478	146417	146362
Bacteria	no rank	Aquificae	57	47	57	47	0	584	584
Bacteria	no rank	Armatimonadetes	39	25	39	25	6	298	298
Bacteria	no rank	Bacteroidetes	3993	69	137	3691	776	5190	5128
Bacteria	no rank	Balneolaeota	21	1	1	21	5	30	30
Bacteria	no rank	Caldiserica	10	8	10	8	0	39	39
Bacteria	no rank	Calditrichaeota	18	14	18	14	0	120	120
Bacteria	no rank	Candidatus Abawacabacteria	2	0	2	0	0	2	2
Bacteria	no rank	Candidatus Abyssubacteria	2	2	2	2	0	19	19
Bacteria	no rank	Candidatus Aerophobetes	16	10	11	15	0	39	39
Bacteria	no rank	Candidatus Amesbacteria	7	1	3	5	0	8	8
Bacteria	no rank	Candidatus Aminicenantes	25	18	24	19	0	130	130
Bacteria	no rank	Candidatus Atribacteria	18	11	18	11	1	100	100
Bacteria	no rank	Candidatus Aureabacteria	1	1	1	1	0	10	10
Bacteria	no rank	Candidatus Azambacteria	6	0	6	0	0	6	6
Bacteria	no rank	Candidatus Beckwithbacteria	3	0	3	0	0	3	3
Bacteria	no rank	Candidatus Berkelbacteria	20	3	6	16	2	24	24
Bacteria	no rank	Candidatus Bipolaricaulota	9	4	8	5	0	37	37
Bacteria	no rank	Candidatus Brennerbacteria	3	0	2	1	0	4	4
Bacteria	no rank	Candidatus Campbellbacteria	2	0	1	0	1	2	2
Bacteria	no rank	Candidatus Cloacimonetes	21	16	21	16	1	111	111
Bacteria	no rank	Candidatus Coatesbacteria	5	3	5	3	0	12	12
Bacteria	no rank	Candidatus Collierbacteria	6	0	6	0	0	6	6
Bacteria	no rank	Candidatus Colwellbacteria	1	0	1	0	0	1	1
Bacteria	no rank	Candidatus Cryosericota	7	7	7	7	2	37	37
Bacteria	no rank	Candidatus Curtissbacteria	6	0	6	0	0	6	6
Bacteria	no rank	Candidatus Dadabacteria	9	6	6	9	0	47	47
Bacteria	no rank	Candidatus Daviesbacteria	9	1	7	1	2	10	10
Bacteria	no rank	Candidatus Delongbacteria	1	1	1	1	0	3	3
Bacteria	no rank	Candidatus Desantisbacteria	11	1	11	1	0	37	37
Bacteria	no rank	Candidatus Dormibacteraeota	3	3	3	3	0	35	35
Bacteria	no rank	Candidatus Doudnabacteria	7	0	7	0	0	8	8
Bacteria	no rank	Candidatus Edwardsbacteria	3	1	3	1	0	16	16
Bacteria	no rank	Candidatus Eisenbacteria	12	11	12	11	0	69	69
Bacteria	no rank	Candidatus Eremiobacteraeota	2	2	2	2	0	13	13
Bacteria	no rank	Candidatus Falkowbacteria	9	0	9	0	0	9	9
Bacteria	no rank	Candidatus Fermentibacteria	6	4	6	4	0	36	36
Bacteria	no rank	Candidatus Firestonebacteria	3	2	3	2	1	30	30
Bacteria	no rank	Candidatus Fischerbacteria	1	1	1	1	0	11	11
Bacteria	no rank	Candidatus Fraserbacteria	1	1	1	1	1	4	4
Bacteria	no rank	Candidatus Giovannonibacteria	6	0	1	5	0	6	6
Bacteria	no rank	Candidatus Glassbacteria	3	2	3	2	0	9	9
Bacteria	no rank	Candidatus Goldbacteria	1	1	1	1	0	14	14
Bacteria	no rank	Candidatus Gottesmanbacteria	9	0	9	0	0	10	10
Bacteria	no rank	Candidatus Gracilibacteria	8	0	6	0	2	15	15
Bacteria	no rank	Candidatus Handelsmanbacteria	1	1	1	1	0	6	6
Bacteria	no rank	Candidatus Harrisonbacteria	2	0	2	0	0	2	2
Bacteria	no rank	Candidatus Hydrogenedentes	6	6	6	6	0	67	67
Bacteria	no rank	Candidatus Hydrothermae	4	2	4	2	0	28	28
Bacteria	no rank	Candidatus Jorgensenbacteria	7	1	5	3	0	8	8
Bacteria	no rank	Candidatus Kaiserbacteria	16	0	14	0	2	17	17
Bacteria	no rank	Candidatus Kapabacteria	2	2	2	2	0	4	4
Bacteria	no rank	Candidatus Kerfeldbacteria	3	0	3	0	0	3	3
Bacteria	no rank	Candidatus Komeilibacteria	1	0	1	0	0	1	1
Bacteria	no rank	Candidatus Kryptonia	13	7	10	10	0	20	20
Bacteria	no rank	Candidatus Kuenenbacteria	2	0	1	0	1	2	2
Bacteria	no rank	Candidatus Latescibacteria	12	7	9	10	1	26	26
Bacteria	no rank	Candidatus Levybacteria	14	0	14	0	0	14	14
Bacteria	no rank	Candidatus Lindowbacteria	2	1	2	1	0	14	14
Bacteria	no rank	Candidatus Liptonbacteria	4	0	3	1	0	4	4
Bacteria	no rank	Candidatus Lloydbacteria	6	0	5	0	1	6	6
Bacteria	no rank	Candidatus Magasanikbacteria	20	0	19	0	3	22	22
Bacteria	no rank	Candidatus Margulisbacteria	6	2	3	5	3	16	16
Bacteria	no rank	Candidatus Marinimicrobia	32	22	30	24	0	71	71
Bacteria	no rank	Candidatus Melainabacteria	45	22	45	22	3	289	289
Bacteria	no rank	Candidatus Microgenomates	3	0	1	0	2	3	3
Bacteria	no rank	Candidatus Moranbacteria	16	0	15	0	2	17	17
Bacteria	no rank	Candidatus Nealsonbacteria	4	0	3	1	1	7	7
Bacteria	no rank	Candidatus Niyogibacteria	2	0	0	2	0	2	2
Bacteria	no rank	Candidatus Nomurabacteria	18	0	18	0	0	18	18
Bacteria	no rank	Candidatus Omnitrophica	115	64	115	64	1	640	640
Bacteria	no rank	Candidatus Pacebacteria	8	0	7	0	1	8	8
Bacteria	no rank	Candidatus Parcubacteria	13	2	12	3	0	19	19
Bacteria	no rank	Candidatus Peregrinibacteria	24	0	13	5	7	26	26
Bacteria	no rank	Candidatus Poribacteria	9	1	1	8	4	18	18
Bacteria	no rank	Candidatus Portnoybacteria	4	1	2	3	0	5	5
Bacteria	no rank	Candidatus Raymondbacteria	4	0	3	1	0	15	15
Bacteria	no rank	Candidatus Riflebacteria	5	3	5	3	0	76	76
Bacteria	no rank	Candidatus Roizmanbacteria	16	0	10	0	6	16	16
Bacteria	no rank	Candidatus Rokubacteria	83	34	81	36	1	384	384
Bacteria	no rank	Candidatus Ryanbacteria	3	0	0	2	1	3	3
Bacteria	no rank	Candidatus Saccharibacteria	18	0	12	0	6	19	19
Bacteria	no rank	Candidatus Schekmanbacteria	6	3	6	3	0	36	36
Bacteria	no rank	Candidatus Shapirobacteria	10	0	10	0	0	10	10
Bacteria	no rank	Candidatus Spechtbacteria	1	0	0	1	0	1	1
Bacteria	no rank	Candidatus Staskawiczbacteria	1	0	1	0	0	1	1
Bacteria	no rank	Candidatus Sumerlaeota	2	1	1	2	0	9	9
Bacteria	no rank	Candidatus Sungbacteria	1	0	1	0	0	1	1
Bacteria	no rank	Candidatus Tagabacteria	5	0	0	5	0	5	5
Bacteria	no rank	Candidatus Taylorbacteria	1	0	0	0	1	1	1
Bacteria	no rank	Candidatus Tectomicrobia	6	4	6	4	0	38	30
Bacteria	no rank	Candidatus Terrybacteria	3	0	2	1	0	3	3
Bacteria	no rank	Candidatus Uhrbacteria	14	0	12	0	2	17	17
Bacteria	no rank	Candidatus Vogelbacteria	1	0	0	0	1	1	1
Bacteria	no rank	Candidatus Wallbacteria	2	1	2	1	0	32	32
Bacteria	no rank	Candidatus Wirthbacteria	1	0	1	0	0	1	1
Bacteria	no rank	Candidatus Woesebacteria	19	0	15	0	5	24	24
Bacteria	no rank	Candidatus Wolfebacteria	8	3	8	3	1	12	12
Bacteria	no rank	Candidatus Yanofskybacteria	8	0	8	0	0	8	8
Bacteria	no rank	Candidatus Yonathbacteria	6	0	6	0	0	7	7
Bacteria	no rank	Candidatus Zambryskibacteria	14	0	13	1	1	17	17
Bacteria	no rank	Chlamydiae	399	7	7	399	2	410	410
Bacteria	no rank	Chlorobi	42	8	40	10	2	85	85
Bacteria	no rank	Chloroflexi	552	303	530	325	25	4200	4200
Bacteria	no rank	Chrysiogenetes	4	3	4	3	1	69	69
Bacteria	no rank	Coprothermobacterota	4	4	4	4	0	14	14
Bacteria	no rank	Cyanobacteria	736	514	601	649	75	8501	8495
Bacteria	no rank	Deferribacteres	13	13	13	13	0	278	278
Bacteria	no rank	Deinococcus-Thermus	170	136	170	136	14	2790	2788
Bacteria	no rank	Dictyoglomi	5	3	4	4	0	35	35
Bacteria	no rank	Elusimicrobia	71	45	68	48	7	383	383
Bacteria	no rank	Fibrobacteres	45	45	45	45	5	1144	1143
Bacteria	no rank	Firmicutes	51550	33058	33517	51074	3091	301684	299901
Bacteria	no rank	Fusobacteria	259	36	38	257	11	764	747
Bacteria	no rank	Gemmatimonadetes	113	59	111	61	0	985	985
Bacteria	no rank	Ignavibacteriae	52	30	45	37	6	95	95
Bacteria	no rank	Kiritimatiellaeota	5	5	5	5	0	14	14
Bacteria	no rank	Lentisphaerae	17	11	12	16	2	37	37
Bacteria	no rank	Nitrospinae	17	4	17	4	0	110	110
Bacteria	no rank	Nitrospirae	170	55	170	55	9	1448	1434
Bacteria	no rank	Planctomycetes	357	270	339	288	29	2246	2245
Bacteria	no rank	Proteobacteria	91353	870	91188	894	16896	1745500	1744200
Bacteria	no rank	Rhodothermaeota	7	4	4	7	1	16	16
Bacteria	no rank	Spirochaetes	1129	1064	1117	1076	32	11100	11078
Bacteria	no rank	Synergistetes	43	39	43	39	0	463	463
Bacteria	no rank	Tenericutes	524	44	60	506	12	1121	1106
Bacteria	no rank	Thermodesulfobacteria	25	18	25	18	0	257	257
Bacteria	no rank	Thermotogae	122	109	122	109	5	1319	1319
Bacteria	no rank	Verrucomicrobia	437	39	48	426	14	533	531
Bacteria	no rank	candidate division CPR2	3	0	3	0	0	7	7
Bacteria	no rank	candidate division CPR3	3	0	3	0	0	3	3
Bacteria	no rank	candidate division KD3-62	1	1	1	1	0	3	3
Bacteria	no rank	candidate division LCP-89	1	1	1	1	0	4	4
Bacteria	no rank	candidate division NC10	7	3	6	3	1	25	25
Bacteria	no rank	candidate division WOR-3	8	5	6	7	0	43	43
Bacteria	no rank	candidate division WWE3	23	0	7	13	3	23	23
Bacteria	no rank	candidate division Zixibacteria	24	19	22	21	0	91	91
Bacteria	no rank	no rank	396	158	340	205	35	3098	3098
Eukaryota	Fungi	Ascomycota	9	0	8	1	2	40	40
Eukaryota	Fungi	Basidiomycota	4	0	4	0	0	4	4
Eukaryota	Fungi	Chytridiomycota	1	0	0	1	0	1	1
Eukaryota	Fungi	Microsporidia	1	0	0	0	1	1	1
Eukaryota	Fungi	Mucoromycota	6	0	6	0	0	16	16
Eukaryota	Metazoa	Annelida	1	0	1	0	0	6	6
Eukaryota	Metazoa	Arthropoda	17	1	14	3	1	80	80
Eukaryota	Metazoa	Chordata	55	0	1	0	54	69	70
Eukaryota	Metazoa	Cnidaria	3	0	2	0	1	15	16
Eukaryota	Metazoa	Echinodermata	1	0	0	0	1	3	3
Eukaryota	Metazoa	Mollusca	2	0	0	0	2	5	5
Eukaryota	Metazoa	Nematoda	3	0	3	0	1	11	11
Eukaryota	Metazoa	Placozoa	1	0	1	0	0	3	3
Eukaryota	Viridiplantae	Chlorophyta	1	0	1	0	0	3	3
Eukaryota	Viridiplantae	Streptophyta	12	0	12	0	1	38	38
Eukaryota	no rank	Apicomplexa	1	0	0	1	0	1	1
Eukaryota	no rank	Euglenozoa	1	0	1	0	0	1	1
Eukaryota	no rank	Evosea	5	0	5	0	0	18	18
Eukaryota	no rank	Foraminifera	1	1	1	1	0	2	2
Eukaryota	no rank	Haptista	1	0	1	0	0	4	4
Eukaryota	no rank	no rank	4	0	1	2	1	4	4
Viruses	no rank	no rank	7	0	7	0	0	7	7

## Sheet: class
domain	kingdom	phylum	class	genomes	dac_n_ggdef	GGDEF	DAC	SMODS	loci	proteins
Archaea	no rank	Candidatus Aenigmarchaeota	no rank	5	1	4	2	0	6	6
Archaea	no rank	Candidatus Bathyarchaeota	no rank	8	0	4	3	1	11	11
Archaea	no rank	Candidatus Diapherotrites	no rank	4	0	4	0	0	6	6
Archaea	no rank	Candidatus Geothermarchaeota	no rank	1	0	1	0	0	1	1
Archaea	no rank	Candidatus Heimdallarchaeota	no rank	3	0	0	0	3	3	3
Archaea	no rank	Candidatus Lokiarchaeota	no rank	3	0	0	1	2	4	4
Archaea	no rank	Candidatus Micrarchaeota	no rank	13	0	11	0	2	13	13
Archaea	no rank	Candidatus Thorarchaeota	no rank	2	1	2	1	0	3	3
Archaea	no rank	Candidatus Woesearchaeota	no rank	30	4	27	6	3	52	52
Archaea	no rank	Crenarchaeota	Thermoprotei	38	0	1	1	36	38	38
Archaea	no rank	Crenarchaeota	no rank	1	0	1	0	0	1	1
Archaea	no rank	Euryarchaeota	Archaeoglobi	16	0	0	16	0	16	16
Archaea	no rank	Euryarchaeota	Candidatus Methanofastidiosa	5	1	2	4	0	6	6
Archaea	no rank	Euryarchaeota	Candidatus Methanoliparia	4	0	0	2	3	5	5
Archaea	no rank	Euryarchaeota	Candidatus Poseidoniia	22	0	0	21	1	22	22
Archaea	no rank	Euryarchaeota	Hadesarchaea	10	1	1	10	1	12	12
Archaea	no rank	Euryarchaeota	Halobacteria	438	8	8	437	39	644	644
Archaea	no rank	Euryarchaeota	Methanobacteria	8	0	2	1	5	10	10
Archaea	no rank	Euryarchaeota	Methanococci	26	0	0	26	1	27	27
Archaea	no rank	Euryarchaeota	Methanomicrobia	218	5	8	213	13	256	256
Archaea	no rank	Euryarchaeota	Methanonatronarchaeia	3	0	0	3	0	3	3
Archaea	no rank	Euryarchaeota	Methanopyri	2	0	0	2	0	2	2
Archaea	no rank	Euryarchaeota	Theionarchaea	2	0	0	2	0	2	2
Archaea	no rank	Euryarchaeota	Thermococci	60	0	2	58	3	63	63
Archaea	no rank	Euryarchaeota	Thermoplasmata	21	1	10	12	1	30	30
Archaea	no rank	Euryarchaeota	no rank	21	1	5	16	1	25	25
Archaea	no rank	Nanoarchaeota	no rank	1	0	0	1	0	1	1
Archaea	no rank	Thaumarchaeota	no rank	1	0	0	1	0	1	1
Archaea	no rank	no rank	no rank	49	6	13	33	16	81	81
Bacteria	no rank	Abditibacteriota	Abditibacteria	1	1	1	1	0	22	22
Bacteria	no rank	Acidobacteria	Acidobacteriia	53	10	52	11	4	656	656
Bacteria	no rank	Acidobacteria	Blastocatellia	7	7	7	7	0	58	58
Bacteria	no rank	Acidobacteria	Holophagae	2	0	2	0	0	28	28
Bacteria	no rank	Acidobacteria	Thermoanaerobaculia	1	1	1	1	0	10	10
Bacteria	no rank	Acidobacteria	Vicinamibacteria	1	1	1	1	0	4	4
Bacteria	no rank	Acidobacteria	no rank	262	156	257	161	14	2714	2714
Bacteria	no rank	Actinobacteria	Acidimicrobiia	37	12	33	16	3	281	281
Bacteria	no rank	Actinobacteria	Actinobacteria	16350	13291	15953	13606	1437	142466	142420
Bacteria	no rank	Actinobacteria	Coriobacteriia	339	173	267	241	30	2349	2340
Bacteria	no rank	Actinobacteria	Nitriliruptoria	9	9	9	9	2	292	292
Bacteria	no rank	Actinobacteria	Rubrobacteria	10	10	10	10	1	147	147
Bacteria	no rank	Actinobacteria	Thermoleophilia	18	14	18	14	1	452	452
Bacteria	no rank	Actinobacteria	no rank	59	22	59	22	4	430	430
Bacteria	no rank	Aquificae	Aquificae	50	46	50	46	0	550	550
Bacteria	no rank	Aquificae	no rank	7	1	7	1	0	34	34
Bacteria	no rank	Armatimonadetes	Armatimonadia	1	1	1	1	0	52	52
Bacteria	no rank	Armatimonadetes	Chthonomonadetes	4	4	4	4	3	35	35
Bacteria	no rank	Armatimonadetes	Fimbriimonadia	1	1	1	1	0	12	12
Bacteria	no rank	Armatimonadetes	no rank	33	19	33	19	3	199	199
Bacteria	no rank	Bacteroidetes	Bacteroidia	2132	20	20	2126	245	2570	2509
Bacteria	no rank	Bacteroidetes	Chitinophagia	81	1	7	56	27	102	102
Bacteria	no rank	Bacteroidetes	Cytophagia	320	5	10	312	75	609	609
Bacteria	no rank	Bacteroidetes	Flavobacteriia	967	7	48	736	329	1239	1238
Bacteria	no rank	Bacteroidetes	Saprospiria	20	1	1	20	6	30	30
Bacteria	no rank	Bacteroidetes	Sphingobacteriia	272	14	20	259	68	374	374
Bacteria	no rank	Bacteroidetes	no rank	201	21	31	182	26	266	266
Bacteria	no rank	Balneolaeota	Balneolia	20	1	1	20	5	29	29
Bacteria	no rank	Balneolaeota	no rank	1	0	0	1	0	1	1
Bacteria	no rank	Caldiserica	Caldisericia	4	4	4	4	0	19	19
Bacteria	no rank	Caldiserica	no rank	6	4	6	4	0	20	20
Bacteria	no rank	Calditrichaeota	Calditrichae	8	6	8	6	0	57	57
Bacteria	no rank	Calditrichaeota	no rank	10	8	10	8	0	63	63
Bacteria	no rank	Candidatus Abawacabacteria	no rank	2	0	2	0	0	2	2
Bacteria	no rank	Candidatus Abyssubacteria	no rank	2	2	2	2	0	19	19
Bacteria	no rank	Candidatus Aerophobetes	no rank	16	10	11	15	0	39	39
Bacteria	no rank	Candidatus Amesbacteria	no rank	7	1	3	5	0	8	8
Bacteria	no rank	Candidatus Aminicenantes	no rank	25	18	24	19	0	130	130
Bacteria	no rank	Candidatus Atribacteria	no rank	18	11	18	11	1	100	100
Bacteria	no rank	Candidatus Aureabacteria	no rank	1	1	1	1	0	10	10
Bacteria	no rank	Candidatus Azambacteria	no rank	6	0	6	0	0	6	6
Bacteria	no rank	Candidatus Beckwithbacteria	no rank	3	0	3	0	0	3	3
Bacteria	no rank	Candidatus Berkelbacteria	no rank	20	3	6	16	2	24	24
Bacteria	no rank	Candidatus Bipolaricaulota	no rank	9	4	8	5	0	37	37
Bacteria	no rank	Candidatus Brennerbacteria	no rank	3	0	2	1	0	4	4
Bacteria	no rank	Candidatus Campbellbacteria	no rank	2	0	1	0	1	2	2
Bacteria	no rank	Candidatus Cloacimonetes	no rank	21	16	21	16	1	111	111
Bacteria	no rank	Candidatus Coatesbacteria	no rank	5	3	5	3	0	12	12
Bacteria	no rank	Candidatus Collierbacteria	no rank	6	0	6	0	0	6	6
Bacteria	no rank	Candidatus Colwellbacteria	no rank	1	0	1	0	0	1	1
Bacteria	no rank	Candidatus Cryosericota	Candidatus Cryosericia	7	7	7	7	2	37	37
Bacteria	no rank	Candidatus Curtissbacteria	no rank	6	0	6	0	0	6	6
Bacteria	no rank	Candidatus Dadabacteria	no rank	9	6	6	9	0	47	47
Bacteria	no rank	Candidatus Daviesbacteria	no rank	9	1	7	1	2	10	10
Bacteria	no rank	Candidatus Delongbacteria	no rank	1	1	1	1	0	3	3
Bacteria	no rank	Candidatus Desantisbacteria	no rank	11	1	11	1	0	37	37
Bacteria	no rank	Candidatus Dormibacteraeota	no rank	3	3	3	3	0	35	35
Bacteria	no rank	Candidatus Doudnabacteria	no rank	7	0	7	0	0	8	8
Bacteria	no rank	Candidatus Edwardsbacteria	no rank	3	1	3	1	0	16	16
Bacteria	no rank	Candidatus Eisenbacteria	no rank	12	11	12	11	0	69	69
Bacteria	no rank	Candidatus Eremiobacteraeota	no rank	2	2	2	2	0	13	13
Bacteria	no rank	Candidatus Falkowbacteria	no rank	9	0	9	0	0	9	9
Bacteria	no rank	Candidatus Fermentibacteria	Candidatus Fermentibacteria (class)	3	1	3	1	0	7	7
Bacteria	no rank	Candidatus Fermentibacteria	no rank	3	3	3	3	0	29	29
Bacteria	no rank	Candidatus Firestonebacteria	no rank	3	2	3	2	1	30	30
Bacteria	no rank	Candidatus Fischerbacteria	no rank	1	1	1	1	0	11	11
Bacteria	no rank	Candidatus Fraserbacteria	no rank	1	1	1	1	1	4	4
Bacteria	no rank	Candidatus Giovannonibacteria	no rank	6	0	1	5	0	6	6
Bacteria	no rank	Candidatus Glassbacteria	no rank	3	2	3	2	0	9	9
Bacteria	no rank	Candidatus Goldbacteria	no rank	1	1	1	1	0	14	14
Bacteria	no rank	Candidatus Gottesmanbacteria	no rank	9	0	9	0	0	10	10
Bacteria	no rank	Candidatus Gracilibacteria	no rank	8	0	6	0	2	15	15
Bacteria	no rank	Candidatus Handelsmanbacteria	no rank	1	1	1	1	0	6	6
Bacteria	no rank	Candidatus Harrisonbacteria	no rank	2	0	2	0	0	2	2
Bacteria	no rank	Candidatus Hydrogenedentes	no rank	6	6	6	6	0	67	67
Bacteria	no rank	Candidatus Hydrothermae	no rank	4	2	4	2	0	28	28
Bacteria	no rank	Candidatus Jorgensenbacteria	no rank	7	1	5	3	0	8	8
Bacteria	no rank	Candidatus Kaiserbacteria	no rank	16	0	14	0	2	17	17
Bacteria	no rank	Candidatus Kapabacteria	no rank	2	2	2	2	0	4	4
Bacteria	no rank	Candidatus Kerfeldbacteria	no rank	3	0	3	0	0	3	3
Bacteria	no rank	Candidatus Komeilibacteria	no rank	1	0	1	0	0	1	1
Bacteria	no rank	Candidatus Kryptonia	no rank	13	7	10	10	0	20	20
Bacteria	no rank	Candidatus Kuenenbacteria	no rank	2	0	1	0	1	2	2
Bacteria	no rank	Candidatus Latescibacteria	no rank	12	7	9	10	1	26	26
Bacteria	no rank	Candidatus Levybacteria	no rank	14	0	14	0	0	14	14
Bacteria	no rank	Candidatus Lindowbacteria	no rank	2	1	2	1	0	14	14
Bacteria	no rank	Candidatus Liptonbacteria	no rank	4	0	3	1	0	4	4
Bacteria	no rank	Candidatus Lloydbacteria	no rank	6	0	5	0	1	6	6
Bacteria	no rank	Candidatus Magasanikbacteria	no rank	20	0	19	0	3	22	22
Bacteria	no rank	Candidatus Margulisbacteria	Candidatus Riflemargulisbacteria	2	2	2	2	1	10	10
Bacteria	no rank	Candidatus Margulisbacteria	Candidatus Termititenacia	3	0	0	3	1	4	4
Bacteria	no rank	Candidatus Margulisbacteria	no rank	1	0	1	0	1	2	2
Bacteria	no rank	Candidatus Marinimicrobia	no rank	32	22	30	24	0	71	71
Bacteria	no rank	Candidatus Melainabacteria	no rank	45	22	45	22	3	289	289
Bacteria	no rank	Candidatus Microgenomates	no rank	3	0	1	0	2	3	3
Bacteria	no rank	Candidatus Moranbacteria	no rank	16	0	15	0	2	17	17
Bacteria	no rank	Candidatus Nealsonbacteria	no rank	4	0	3	1	1	7	7
Bacteria	no rank	Candidatus Niyogibacteria	no rank	2	0	0	2	0	2	2
Bacteria	no rank	Candidatus Nomurabacteria	no rank	18	0	18	0	0	18	18
Bacteria	no rank	Candidatus Omnitrophica	no rank	115	64	115	64	1	640	640
Bacteria	no rank	Candidatus Pacebacteria	no rank	8	0	7	0	1	8	8
Bacteria	no rank	Candidatus Parcubacteria	no rank	13	2	12	3	0	19	19
Bacteria	no rank	Candidatus Peregrinibacteria	Candidatus Peribacteria	4	0	1	0	3	4	4
Bacteria	no rank	Candidatus Peregrinibacteria	no rank	20	0	12	5	4	22	22
Bacteria	no rank	Candidatus Poribacteria	no rank	9	1	1	8	4	18	18
Bacteria	no rank	Candidatus Portnoybacteria	no rank	4	1	2	3	0	5	5
Bacteria	no rank	Candidatus Raymondbacteria	no rank	4	0	3	1	0	15	15
Bacteria	no rank	Candidatus Riflebacteria	Candidatus Ozemobacteria	1	1	1	1	0	20	20
Bacteria	no rank	Candidatus Riflebacteria	no rank	4	2	4	2	0	56	56
Bacteria	no rank	Candidatus Roizmanbacteria	no rank	16	0	10	0	6	16	16
Bacteria	no rank	Candidatus Rokubacteria	no rank	83	34	81	36	1	384	384
Bacteria	no rank	Candidatus Ryanbacteria	no rank	3	0	0	2	1	3	3
Bacteria	no rank	Candidatus Saccharibacteria	no rank	18	0	12	0	6	19	19
Bacteria	no rank	Candidatus Schekmanbacteria	no rank	6	3	6	3	0	36	36
Bacteria	no rank	Candidatus Shapirobacteria	no rank	10	0	10	0	0	10	10
Bacteria	no rank	Candidatus Spechtbacteria	no rank	1	0	0	1	0	1	1
Bacteria	no rank	Candidatus Staskawiczbacteria	no rank	1	0	1	0	0	1	1
Bacteria	no rank	Candidatus Sumerlaeota	no rank	2	1	1	2	0	9	9
Bacteria	no rank	Candidatus Sungbacteria	no rank	1	0	1	0	0	1	1
Bacteria	no rank	Candidatus Tagabacteria	no rank	5	0	0	5	0	5	5
Bacteria	no rank	Candidatus Taylorbacteria	no rank	1	0	0	0	1	1	1
Bacteria	no rank	Candidatus Tectomicrobia	no rank	6	4	6	4	0	38	30
Bacteria	no rank	Candidatus Terrybacteria	no rank	3	0	2	1	0	3	3
Bacteria	no rank	Candidatus Uhrbacteria	no rank	14	0	12	0	2	17	17
Bacteria	no rank	Candidatus Vogelbacteria	no rank	1	0	0	0	1	1	1
Bacteria	no rank	Candidatus Wallbacteria	no rank	2	1	2	1	0	32	32
Bacteria	no rank	Candidatus Wirthbacteria	no rank	1	0	1	0	0	1	1
Bacteria	no rank	Candidatus Woesebacteria	no rank	19	0	15	0	5	24	24
Bacteria	no rank	Candidatus Wolfebacteria	no rank	8	3	8	3	1	12	12
Bacteria	no rank	Candidatus Yanofskybacteria	no rank	8	0	8	0	0	8	8
Bacteria	no rank	Candidatus Yonathbacteria	no rank	6	0	6	0	0	7	7
Bacteria	no rank	Candidatus Zambryskibacteria	no rank	14	0	13	1	1	17	17
Bacteria	no rank	Chlamydiae	Chlamydiia	391	3	3	391	2	397	397
Bacteria	no rank	Chlamydiae	no rank	8	4	4	8	0	13	13
Bacteria	no rank	Chlorobi	Chlorobia	36	4	36	4	2	75	75
Bacteria	no rank	Chlorobi	no rank	6	4	4	6	0	10	10
Bacteria	no rank	Chloroflexi	Anaerolineae	70	52	63	59	9	620	620
Bacteria	no rank	Chloroflexi	Ardenticatenia	5	5	5	5	0	47	47
Bacteria	no rank	Chloroflexi	Caldilineae	6	4	6	4	0	17	17
Bacteria	no rank	Chloroflexi	Candidatus Thermofonsia	10	8	10	8	0	45	45
Bacteria	no rank	Chloroflexi	Chloroflexia	22	20	22	20	4	334	334
Bacteria	no rank	Chloroflexi	Dehalococcoidia	70	9	69	10	5	147	147
Bacteria	no rank	Chloroflexi	Ktedonobacteria	17	0	17	0	0	65	65
Bacteria	no rank	Chloroflexi	Tepidiformia	1	1	1	1	1	13	13
Bacteria	no rank	Chloroflexi	Thermoflexia	3	3	3	3	0	18	18
Bacteria	no rank	Chloroflexi	Thermomicrobia	7	7	7	7	0	66	66
Bacteria	no rank	Chloroflexi	no rank	341	194	327	208	6	2828	2828
Bacteria	no rank	Chrysiogenetes	Chrysiogenetes	4	3	4	3	1	69	69
Bacteria	no rank	Coprothermobacterota	Coprothermobacteria	4	4	4	4	0	14	14
Bacteria	no rank	Cyanobacteria	Gloeobacteria	2	2	2	2	0	9	9
Bacteria	no rank	Cyanobacteria	no rank	734	512	599	647	75	8492	8486
Bacteria	no rank	Deferribacteres	Deferribacteres	13	13	13	13	0	278	278
Bacteria	no rank	Deinococcus-Thermus	Deinococci	169	136	169	136	14	2788	2786
Bacteria	no rank	Deinococcus-Thermus	no rank	1	0	1	0	0	2	2
Bacteria	no rank	Dictyoglomi	Dictyoglomia	5	3	4	4	0	35	35
Bacteria	no rank	Elusimicrobia	Elusimicrobia	2	0	2	0	0	6	6
Bacteria	no rank	Elusimicrobia	Endomicrobia	3	1	1	3	0	9	9
Bacteria	no rank	Elusimicrobia	no rank	66	44	65	45	7	368	368
Bacteria	no rank	Fibrobacteres	Chitinivibrionia	1	1	1	1	0	12	12
Bacteria	no rank	Fibrobacteres	Fibrobacteria	43	43	43	43	5	1123	1122
Bacteria	no rank	Fibrobacteres	no rank	1	1	1	1	0	9	9
Bacteria	no rank	Firmicutes	Bacilli	45225	27430	27594	45051	2616	171220	171134
Bacteria	no rank	Firmicutes	Clostridia	5479	5150	5405	5222	391	121994	120679
Bacteria	no rank	Firmicutes	Erysipelotrichia	226	171	181	215	32	3577	3541
Bacteria	no rank	Firmicutes	Limnochordia	1	1	1	1	0	6	6
Bacteria	no rank	Firmicutes	Negativicutes	313	162	166	306	29	2627	2552
Bacteria	no rank	Firmicutes	Tissierellia	173	42	43	171	10	487	487
Bacteria	no rank	Firmicutes	no rank	133	102	127	108	13	1773	1502
Bacteria	no rank	Fusobacteria	Fusobacteriia	258	36	38	256	11	763	746
Bacteria	no rank	Fusobacteria	no rank	1	0	0	1	0	1	1
Bacteria	no rank	Gemmatimonadetes	Gemmatimonadetes	21	10	21	10	0	139	139
Bacteria	no rank	Gemmatimonadetes	no rank	92	49	90	51	0	846	846
Bacteria	no rank	Ignavibacteriae	Ignavibacteria	42	23	36	29	5	73	73
Bacteria	no rank	Ignavibacteriae	no rank	10	7	9	8	1	22	22
Bacteria	no rank	Kiritimatiellaeota	Kiritimatiellae	5	5	5	5	0	14	14
Bacteria	no rank	Lentisphaerae	Lentisphaeria	5	1	1	5	1	9	9
Bacteria	no rank	Lentisphaerae	no rank	12	10	11	11	1	28	28
Bacteria	no rank	Nitrospinae	Nitrospinia	6	0	6	0	0	38	38
Bacteria	no rank	Nitrospinae	no rank	11	4	11	4	0	72	72
Bacteria	no rank	Nitrospirae	Nitrospira	78	28	78	28	7	815	801
Bacteria	no rank	Nitrospirae	no rank	92	27	92	27	2	633	633
Bacteria	no rank	Planctomycetes	Candidatus Brocadiae	22	17	22	17	1	253	253
Bacteria	no rank	Planctomycetes	Phycisphaerae	25	22	25	22	2	103	103
Bacteria	no rank	Planctomycetes	Planctomycetia	83	68	78	73	14	605	604
Bacteria	no rank	Planctomycetes	no rank	227	163	214	176	12	1285	1285
Bacteria	no rank	Proteobacteria	Acidithiobacillia	46	0	46	0	3	670	670
Bacteria	no rank	Proteobacteria	Alphaproteobacteria	8240	21	8213	23	1545	141365	141219
Bacteria	no rank	Proteobacteria	Betaproteobacteria	6830	4	6798	5	983	130647	130508
Bacteria	no rank	Proteobacteria	Candidatus Lambdaproteobacteria	4	2	4	2	0	30	30
Bacteria	no rank	Proteobacteria	Candidatus Muproteobacteria	14	0	14	0	0	190	190
Bacteria	no rank	Proteobacteria	Deltaproteobacteria	879	671	861	689	131	12201	12119
Bacteria	no rank	Proteobacteria	Epsilonproteobacteria	3601	2	3594	2	97	13697	13687
Bacteria	no rank	Proteobacteria	Gammaproteobacteria	71539	75	71460	76	14125	1444381	1443461
Bacteria	no rank	Proteobacteria	Hydrogenophilalia	38	1	38	1	3	665	665
Bacteria	no rank	Proteobacteria	Oligoflexia	59	50	59	50	4	262	262
Bacteria	no rank	Proteobacteria	Zetaproteobacteria	35	25	35	25	0	510	510
Bacteria	no rank	Proteobacteria	no rank	68	19	66	21	5	882	879
Bacteria	no rank	Rhodothermaeota	Rhodothermia	5	4	4	5	1	14	14
Bacteria	no rank	Rhodothermaeota	no rank	2	0	0	2	0	2	2
Bacteria	no rank	Spirochaetes	Spirochaetia	1084	1033	1072	1045	27	10383	10361
Bacteria	no rank	Spirochaetes	no rank	45	31	45	31	5	717	717
Bacteria	no rank	Synergistetes	Synergistia	41	38	41	38	0	436	436
Bacteria	no rank	Synergistetes	no rank	2	1	2	1	0	27	27
Bacteria	no rank	Tenericutes	Mollicutes	496	31	33	492	12	845	830
Bacteria	no rank	Tenericutes	no rank	28	13	27	14	0	276	276
Bacteria	no rank	Thermodesulfobacteria	Thermodesulfobacteria	20	15	20	15	0	227	227
Bacteria	no rank	Thermodesulfobacteria	no rank	5	3	5	3	0	30	30
Bacteria	no rank	Thermotogae	Thermotogae	115	103	115	103	5	1276	1276
Bacteria	no rank	Thermotogae	no rank	7	6	7	6	0	43	43
Bacteria	no rank	Verrucomicrobia	Methylacidiphilae	11	0	0	11	0	11	11
Bacteria	no rank	Verrucomicrobia	Opitutae	38	16	16	38	3	61	60
Bacteria	no rank	Verrucomicrobia	Spartobacteria	8	1	1	8	0	9	9
Bacteria	no rank	Verrucomicrobia	Verrucomicrobiae	243	6	8	239	7	267	266
Bacteria	no rank	Verrucomicrobia	no rank	137	16	23	130	4	185	185
Bacteria	no rank	candidate division CPR2	no rank	3	0	3	0	0	7	7
Bacteria	no rank	candidate division CPR3	no rank	3	0	3	0	0	3	3
Bacteria	no rank	candidate division KD3-62	no rank	1	1	1	1	0	3	3
Bacteria	no rank	candidate division LCP-89	no rank	1	1	1	1	0	4	4
Bacteria	no rank	candidate division NC10	no rank	7	3	6	3	1	25	25
Bacteria	no rank	candidate division WOR-3	no rank	8	5	6	7	0	43	43
Bacteria	no rank	candidate division WWE3	no rank	23	0	7	13	3	23	23
Bacteria	no rank	candidate division Zixibacteria	no rank	24	19	22	21	0	91	91
Bacteria	no rank	no rank	no rank	396	158	340	205	35	3098	3098
Eukaryota	Fungi	Ascomycota	Dothideomycetes	2	0	2	0	0	5	5
Eukaryota	Fungi	Ascomycota	Eurotiomycetes	1	0	1	0	0	1	1
Eukaryota	Fungi	Ascomycota	Sordariomycetes	6	0	5	1	2	34	34
Eukaryota	Fungi	Basidiomycota	Agaricomycetes	4	0	4	0	0	4	4
Eukaryota	Fungi	Chytridiomycota	Chytridiomycetes	1	0	0	1	0	1	1
Eukaryota	Fungi	Microsporidia	no rank	1	0	0	0	1	1	1
Eukaryota	Fungi	Mucoromycota	Glomeromycetes	6	0	6	0	0	16	16
Eukaryota	Metazoa	Annelida	Polychaeta	1	0	1	0	0	6	6
Eukaryota	Metazoa	Arthropoda	Arachnida	2	0	1	1	0	18	18
Eukaryota	Metazoa	Arthropoda	Branchiopoda	1	0	1	0	0	2	2
Eukaryota	Metazoa	Arthropoda	Hexanauplia	1	0	0	0	1	1	1
Eukaryota	Metazoa	Arthropoda	Insecta	12	1	11	2	0	46	46
Eukaryota	Metazoa	Arthropoda	Malacostraca	1	0	1	0	0	13	13
Eukaryota	Metazoa	Chordata	Actinopteri	1	0	1	0	0	1	1
Eukaryota	Metazoa	Chordata	Mammalia	53	0	0	0	53	67	68
Eukaryota	Metazoa	Chordata	no rank	1	0	0	0	1	1	1
Eukaryota	Metazoa	Cnidaria	Anthozoa	2	0	1	0	1	13	14
Eukaryota	Metazoa	Cnidaria	Myxozoa	1	0	1	0	0	2	2
Eukaryota	Metazoa	Echinodermata	Holothuroidea	1	0	0	0	1	3	3
Eukaryota	Metazoa	Mollusca	Bivalvia	1	0	0	0	1	1	1
Eukaryota	Metazoa	Mollusca	Gastropoda	1	0	0	0	1	4	4
Eukaryota	Metazoa	Nematoda	Chromadorea	3	0	3	0	1	11	11
Eukaryota	Metazoa	Placozoa	no rank	1	0	1	0	0	3	3
Eukaryota	Viridiplantae	Chlorophyta	Mamiellophyceae	1	0	1	0	0	3	3
Eukaryota	Viridiplantae	Streptophyta	Magnoliopsida	12	0	12	0	1	38	38
Eukaryota	no rank	Apicomplexa	Aconoidasida	1	0	0	1	0	1	1
Eukaryota	no rank	Euglenozoa	no rank	1	0	1	0	0	1	1
Eukaryota	no rank	Evosea	Eumycetozoa	5	0	5	0	0	18	18
Eukaryota	no rank	Foraminifera	no rank	1	1	1	1	0	2	2
Eukaryota	no rank	Haptista	Haptophyta	1	0	1	0	0	4	4
Eukaryota	no rank	no rank	Choanoflagellata	2	0	0	1	1	2	2
Eukaryota	no rank	no rank	Dinophyceae	1	0	0	1	0	1	1
Eukaryota	no rank	no rank	Oomycetes	1	0	1	0	0	1	1
Viruses	no rank	no rank	no rank	7	0	7	0	0	7	7

## Sheet: order
domain	kingdom	phylum	class	order	genomes	dac_n_ggdef	GGDEF	DAC	SMODS	loci	proteins
Archaea	no rank	Candidatus Aenigmarchaeota	no rank	no rank	5	1	4	2	0	6	6
Archaea	no rank	Candidatus Bathyarchaeota	no rank	no rank	8	0	4	3	1	11	11
Archaea	no rank	Candidatus Diapherotrites	no rank	no rank	4	0	4	0	0	6	6
Archaea	no rank	Candidatus Geothermarchaeota	no rank	no rank	1	0	1	0	0	1	1
Archaea	no rank	Candidatus Heimdallarchaeota	no rank	no rank	3	0	0	0	3	3	3
Archaea	no rank	Candidatus Lokiarchaeota	no rank	no rank	3	0	0	1	2	4	4
Archaea	no rank	Candidatus Micrarchaeota	no rank	no rank	13	0	11	0	2	13	13
Archaea	no rank	Candidatus Thorarchaeota	no rank	no rank	2	1	2	1	0	3	3
Archaea	no rank	Candidatus Woesearchaeota	no rank	no rank	30	4	27	6	3	52	52
Archaea	no rank	Crenarchaeota	Thermoprotei	Desulfurococcales	1	0	0	0	1	1	1
Archaea	no rank	Crenarchaeota	Thermoprotei	Sulfolobales	32	0	0	0	32	32	32
Archaea	no rank	Crenarchaeota	Thermoprotei	Thermoproteales	2	0	0	0	2	2	2
Archaea	no rank	Crenarchaeota	Thermoprotei	no rank	3	0	1	1	1	3	3
Archaea	no rank	Crenarchaeota	no rank	no rank	1	0	1	0	0	1	1
Archaea	no rank	Euryarchaeota	Archaeoglobi	Archaeoglobales	16	0	0	16	0	16	16
Archaea	no rank	Euryarchaeota	Candidatus Methanofastidiosa	no rank	5	1	2	4	0	6	6
Archaea	no rank	Euryarchaeota	Candidatus Methanoliparia	Candidatus Methanoliparales	4	0	0	2	3	5	5
Archaea	no rank	Euryarchaeota	Candidatus Poseidoniia	Candidatus Poseidoniales	22	0	0	21	1	22	22
Archaea	no rank	Euryarchaeota	Hadesarchaea	no rank	10	1	1	10	1	12	12
Archaea	no rank	Euryarchaeota	Halobacteria	Halobacteriales	178	4	4	178	13	230	230
Archaea	no rank	Euryarchaeota	Halobacteria	Haloferacales	185	4	4	184	21	320	320
Archaea	no rank	Euryarchaeota	Halobacteria	Natrialbales	75	0	0	75	5	94	94
Archaea	no rank	Euryarchaeota	Methanobacteria	Methanobacteriales	8	0	2	1	5	10	10
Archaea	no rank	Euryarchaeota	Methanococci	Methanococcales	26	0	0	26	1	27	27
Archaea	no rank	Euryarchaeota	Methanomicrobia	Methanocellales	4	1	1	4	0	9	9
Archaea	no rank	Euryarchaeota	Methanomicrobia	Methanomicrobiales	48	0	1	47	2	60	60
Archaea	no rank	Euryarchaeota	Methanomicrobia	Methanophagales	7	0	1	6	3	10	10
Archaea	no rank	Euryarchaeota	Methanomicrobia	Methanosarcinales	159	4	5	156	8	177	177
Archaea	no rank	Euryarchaeota	Methanonatronarchaeia	Methanonatronarchaeales	2	0	0	2	0	2	2
Archaea	no rank	Euryarchaeota	Methanonatronarchaeia	no rank	1	0	0	1	0	1	1
Archaea	no rank	Euryarchaeota	Methanopyri	Methanopyrales	2	0	0	2	0	2	2
Archaea	no rank	Euryarchaeota	Theionarchaea	no rank	2	0	0	2	0	2	2
Archaea	no rank	Euryarchaeota	Thermococci	Thermococcales	51	0	0	51	3	54	54
Archaea	no rank	Euryarchaeota	Thermococci	no rank	9	0	2	7	0	9	9
Archaea	no rank	Euryarchaeota	Thermoplasmata	Thermoplasmatales	4	0	1	3	0	4	4
Archaea	no rank	Euryarchaeota	Thermoplasmata	no rank	17	1	9	9	1	26	26
Archaea	no rank	Euryarchaeota	no rank	no rank	21	1	5	16	1	25	25
Archaea	no rank	Nanoarchaeota	no rank	no rank	1	0	0	1	0	1	1
Archaea	no rank	Thaumarchaeota	no rank	Nitrosopumilales	1	0	0	1	0	1	1
Archaea	no rank	no rank	no rank	no rank	49	6	13	33	16	81	81
Bacteria	no rank	Abditibacteriota	Abditibacteria	Abditibacteriales	1	1	1	1	0	22	22
Bacteria	no rank	Acidobacteria	Acidobacteriia	Acidobacteriales	44	4	44	4	4	603	603
Bacteria	no rank	Acidobacteria	Acidobacteriia	Bryobacterales	5	4	4	5	0	28	28
Bacteria	no rank	Acidobacteria	Acidobacteriia	no rank	4	2	4	2	0	25	25
Bacteria	no rank	Acidobacteria	Blastocatellia	Blastocatellales	1	1	1	1	0	10	10
Bacteria	no rank	Acidobacteria	Blastocatellia	no rank	6	6	6	6	0	48	48
Bacteria	no rank	Acidobacteria	Holophagae	Holophagales	2	0	2	0	0	28	28
Bacteria	no rank	Acidobacteria	Thermoanaerobaculia	Thermoanaerobaculales	1	1	1	1	0	10	10
Bacteria	no rank	Acidobacteria	Vicinamibacteria	no rank	1	1	1	1	0	4	4
Bacteria	no rank	Acidobacteria	no rank	no rank	262	156	257	161	14	2714	2714
Bacteria	no rank	Actinobacteria	Acidimicrobiia	Acidimicrobiales	31	11	27	15	3	254	254
Bacteria	no rank	Actinobacteria	Acidimicrobiia	no rank	6	1	6	1	0	27	27
Bacteria	no rank	Actinobacteria	Actinobacteria	Acidothermales	1	1	1	1	0	17	17
Bacteria	no rank	Actinobacteria	Actinobacteria	Actinomycetales	197	111	123	181	15	361	361
Bacteria	no rank	Actinobacteria	Actinobacteria	Actinopolysporales	12	0	12	0	1	292	292
Bacteria	no rank	Actinobacteria	Actinobacteria	Bifidobacteriales	741	2	684	2	122	1193	1190
Bacteria	no rank	Actinobacteria	Actinobacteria	Candidatus Actinomarinales	3	0	0	3	0	3	3
Bacteria	no rank	Actinobacteria	Actinobacteria	Candidatus Nanopelagicales	15	0	15	0	0	17	17
Bacteria	no rank	Actinobacteria	Actinobacteria	Catenulisporales	4	4	4	4	2	81	81
Bacteria	no rank	Actinobacteria	Actinobacteria	Corynebacteriales	10158	9767	10043	9868	696	86133	86119
Bacteria	no rank	Actinobacteria	Actinobacteria	Cryptosporangiales	3	3	3	3	0	151	151
Bacteria	no rank	Actinobacteria	Actinobacteria	Frankiales	62	61	62	61	51	1431	1430
Bacteria	no rank	Actinobacteria	Actinobacteria	Geodermatophilales	69	63	67	64	6	2275	2275
Bacteria	no rank	Actinobacteria	Actinobacteria	Glycomycetales	19	17	19	17	1	157	156
Bacteria	no rank	Actinobacteria	Actinobacteria	Jiangellales	17	17	17	17	4	162	162
Bacteria	no rank	Actinobacteria	Actinobacteria	Kineosporiales	11	11	11	11	0	655	655
Bacteria	no rank	Actinobacteria	Actinobacteria	Micrococcales	1959	623	1838	741	234	8194	8193
Bacteria	no rank	Actinobacteria	Actinobacteria	Micromonosporales	305	299	304	299	32	7725	7720
Bacteria	no rank	Actinobacteria	Actinobacteria	Nakamurellales	7	7	7	7	0	134	134
Bacteria	no rank	Actinobacteria	Actinobacteria	Propionibacteriales	611	575	598	588	44	2509	2496
Bacteria	no rank	Actinobacteria	Actinobacteria	Pseudonocardiales	291	32	291	32	47	6730	6729
Bacteria	no rank	Actinobacteria	Actinobacteria	Sporichthyales	1	1	1	1	0	12	12
Bacteria	no rank	Actinobacteria	Actinobacteria	Streptomycetales	1537	1498	1527	1506	156	20747	20743
Bacteria	no rank	Actinobacteria	Actinobacteria	Streptosporangiales	189	122	189	122	20	2104	2101
Bacteria	no rank	Actinobacteria	Actinobacteria	no rank	138	77	137	78	6	1383	1383
Bacteria	no rank	Actinobacteria	Coriobacteriia	Coriobacteriales	247	171	179	239	20	976	971
Bacteria	no rank	Actinobacteria	Coriobacteriia	Eggerthellales	89	0	85	0	10	1355	1351
Bacteria	no rank	Actinobacteria	Coriobacteriia	no rank	3	2	3	2	0	18	18
Bacteria	no rank	Actinobacteria	Nitriliruptoria	Egibacterales	1	1	1	1	0	29	29
Bacteria	no rank	Actinobacteria	Nitriliruptoria	Egicoccales	1	1	1	1	0	27	27
Bacteria	no rank	Actinobacteria	Nitriliruptoria	Euzebyales	3	3	3	3	1	165	165
Bacteria	no rank	Actinobacteria	Nitriliruptoria	Nitriliruptorales	4	4	4	4	1	71	71
Bacteria	no rank	Actinobacteria	Rubrobacteria	Gaiellales	2	2	2	2	0	29	29
Bacteria	no rank	Actinobacteria	Rubrobacteria	Rubrobacterales	8	8	8	8	1	118	118
Bacteria	no rank	Actinobacteria	Thermoleophilia	Solirubrobacterales	16	13	16	13	1	429	429
Bacteria	no rank	Actinobacteria	Thermoleophilia	Thermoleophilales	1	1	1	1	0	22	22
Bacteria	no rank	Actinobacteria	Thermoleophilia	no rank	1	0	1	0	0	1	1
Bacteria	no rank	Actinobacteria	no rank	no rank	59	22	59	22	4	430	430
Bacteria	no rank	Aquificae	Aquificae	Aquificales	38	34	38	34	0	415	415
Bacteria	no rank	Aquificae	Aquificae	Desulfurobacteriales	12	12	12	12	0	135	135
Bacteria	no rank	Aquificae	no rank	no rank	7	1	7	1	0	34	34
Bacteria	no rank	Armatimonadetes	Armatimonadia	Capsulimonadales	1	1	1	1	0	52	52
Bacteria	no rank	Armatimonadetes	Chthonomonadetes	Chthonomonadales	4	4	4	4	3	35	35
Bacteria	no rank	Armatimonadetes	Fimbriimonadia	Fimbriimonadales	1	1	1	1	0	12	12
Bacteria	no rank	Armatimonadetes	no rank	no rank	33	19	33	19	3	199	199
Bacteria	no rank	Bacteroidetes	Bacteroidia	Bacteroidales	2060	17	17	2054	231	2445	2384
Bacteria	no rank	Bacteroidetes	Bacteroidia	Marinilabiliales	64	3	3	64	13	115	115
Bacteria	no rank	Bacteroidetes	Bacteroidia	no rank	8	0	0	8	1	10	10
Bacteria	no rank	Bacteroidetes	Chitinophagia	Chitinophagales	81	1	7	56	27	102	102
Bacteria	no rank	Bacteroidetes	Cytophagia	Cytophagales	320	5	10	312	75	609	609
Bacteria	no rank	Bacteroidetes	Flavobacteriia	Flavobacteriales	962	6	47	731	329	1233	1232
Bacteria	no rank	Bacteroidetes	Flavobacteriia	no rank	5	1	1	5	0	6	6
Bacteria	no rank	Bacteroidetes	Saprospiria	Saprospirales	20	1	1	20	6	30	30
Bacteria	no rank	Bacteroidetes	Sphingobacteriia	Sphingobacteriales	272	14	20	259	68	374	374
Bacteria	no rank	Bacteroidetes	no rank	Bacteroidetes Order II. Incertae sedis	24	10	10	24	3	39	39
Bacteria	no rank	Bacteroidetes	no rank	no rank	177	11	21	158	23	227	227
Bacteria	no rank	Balneolaeota	Balneolia	Balneolales	20	1	1	20	5	29	29
Bacteria	no rank	Balneolaeota	no rank	no rank	1	0	0	1	0	1	1
Bacteria	no rank	Caldiserica	Caldisericia	Caldisericales	4	4	4	4	0	19	19
Bacteria	no rank	Caldiserica	no rank	no rank	6	4	6	4	0	20	20
Bacteria	no rank	Calditrichaeota	Calditrichae	Calditrichales	8	6	8	6	0	57	57
Bacteria	no rank	Calditrichaeota	no rank	no rank	10	8	10	8	0	63	63
Bacteria	no rank	Candidatus Abawacabacteria	no rank	no rank	2	0	2	0	0	2	2
Bacteria	no rank	Candidatus Abyssubacteria	no rank	no rank	2	2	2	2	0	19	19
Bacteria	no rank	Candidatus Aerophobetes	no rank	no rank	16	10	11	15	0	39	39
Bacteria	no rank	Candidatus Amesbacteria	no rank	no rank	7	1	3	5	0	8	8
Bacteria	no rank	Candidatus Aminicenantes	no rank	no rank	25	18	24	19	0	130	130
Bacteria	no rank	Candidatus Atribacteria	no rank	no rank	18	11	18	11	1	100	100
Bacteria	no rank	Candidatus Aureabacteria	no rank	no rank	1	1	1	1	0	10	10
Bacteria	no rank	Candidatus Azambacteria	no rank	no rank	6	0	6	0	0	6	6
Bacteria	no rank	Candidatus Beckwithbacteria	no rank	no rank	3	0	3	0	0	3	3
Bacteria	no rank	Candidatus Berkelbacteria	no rank	no rank	20	3	6	16	2	24	24
Bacteria	no rank	Candidatus Bipolaricaulota	no rank	no rank	9	4	8	5	0	37	37
Bacteria	no rank	Candidatus Brennerbacteria	no rank	no rank	3	0	2	1	0	4	4
Bacteria	no rank	Candidatus Campbellbacteria	no rank	no rank	2	0	1	0	1	2	2
Bacteria	no rank	Candidatus Cloacimonetes	no rank	no rank	21	16	21	16	1	111	111
Bacteria	no rank	Candidatus Coatesbacteria	no rank	no rank	5	3	5	3	0	12	12
Bacteria	no rank	Candidatus Collierbacteria	no rank	no rank	6	0	6	0	0	6	6
Bacteria	no rank	Candidatus Colwellbacteria	no rank	no rank	1	0	1	0	0	1	1
Bacteria	no rank	Candidatus Cryosericota	Candidatus Cryosericia	Candidatus Cryosericales	7	7	7	7	2	37	37
Bacteria	no rank	Candidatus Curtissbacteria	no rank	no rank	6	0	6	0	0	6	6
Bacteria	no rank	Candidatus Dadabacteria	no rank	no rank	9	6	6	9	0	47	47
Bacteria	no rank	Candidatus Daviesbacteria	no rank	no rank	9	1	7	1	2	10	10
Bacteria	no rank	Candidatus Delongbacteria	no rank	no rank	1	1	1	1	0	3	3
Bacteria	no rank	Candidatus Desantisbacteria	no rank	no rank	11	1	11	1	0	37	37
Bacteria	no rank	Candidatus Dormibacteraeota	no rank	no rank	3	3	3	3	0	35	35
Bacteria	no rank	Candidatus Doudnabacteria	no rank	no rank	7	0	7	0	0	8	8
Bacteria	no rank	Candidatus Edwardsbacteria	no rank	no rank	3	1	3	1	0	16	16
Bacteria	no rank	Candidatus Eisenbacteria	no rank	no rank	12	11	12	11	0	69	69
Bacteria	no rank	Candidatus Eremiobacteraeota	no rank	Candidatus Eremiobacterales	1	1	1	1	0	11	11
Bacteria	no rank	Candidatus Eremiobacteraeota	no rank	no rank	1	1	1	1	0	2	2
Bacteria	no rank	Candidatus Falkowbacteria	no rank	no rank	9	0	9	0	0	9	9
Bacteria	no rank	Candidatus Fermentibacteria	Candidatus Fermentibacteria (class)	Candidatus Fermentibacterales	3	1	3	1	0	7	7
Bacteria	no rank	Candidatus Fermentibacteria	no rank	no rank	3	3	3	3	0	29	29
Bacteria	no rank	Candidatus Firestonebacteria	no rank	no rank	3	2	3	2	1	30	30
Bacteria	no rank	Candidatus Fischerbacteria	no rank	no rank	1	1	1	1	0	11	11
Bacteria	no rank	Candidatus Fraserbacteria	no rank	no rank	1	1	1	1	1	4	4
Bacteria	no rank	Candidatus Giovannonibacteria	no rank	no rank	6	0	1	5	0	6	6
Bacteria	no rank	Candidatus Glassbacteria	no rank	no rank	3	2	3	2	0	9	9
Bacteria	no rank	Candidatus Goldbacteria	no rank	no rank	1	1	1	1	0	14	14
Bacteria	no rank	Candidatus Gottesmanbacteria	no rank	no rank	9	0	9	0	0	10	10
Bacteria	no rank	Candidatus Gracilibacteria	no rank	no rank	8	0	6	0	2	15	15
Bacteria	no rank	Candidatus Handelsmanbacteria	no rank	no rank	1	1	1	1	0	6	6
Bacteria	no rank	Candidatus Harrisonbacteria	no rank	no rank	2	0	2	0	0	2	2
Bacteria	no rank	Candidatus Hydrogenedentes	no rank	no rank	6	6	6	6	0	67	67
Bacteria	no rank	Candidatus Hydrothermae	no rank	no rank	4	2	4	2	0	28	28
Bacteria	no rank	Candidatus Jorgensenbacteria	no rank	no rank	7	1	5	3	0	8	8
Bacteria	no rank	Candidatus Kaiserbacteria	no rank	no rank	16	0	14	0	2	17	17
Bacteria	no rank	Candidatus Kapabacteria	no rank	no rank	2	2	2	2	0	4	4
Bacteria	no rank	Candidatus Kerfeldbacteria	no rank	no rank	3	0	3	0	0	3	3
Bacteria	no rank	Candidatus Komeilibacteria	no rank	no rank	1	0	1	0	0	1	1
Bacteria	no rank	Candidatus Kryptonia	no rank	no rank	13	7	10	10	0	20	20
Bacteria	no rank	Candidatus Kuenenbacteria	no rank	no rank	2	0	1	0	1	2	2
Bacteria	no rank	Candidatus Latescibacteria	no rank	no rank	12	7	9	10	1	26	26
Bacteria	no rank	Candidatus Levybacteria	no rank	no rank	14	0	14	0	0	14	14
Bacteria	no rank	Candidatus Lindowbacteria	no rank	no rank	2	1	2	1	0	14	14
Bacteria	no rank	Candidatus Liptonbacteria	no rank	no rank	4	0	3	1	0	4	4
Bacteria	no rank	Candidatus Lloydbacteria	no rank	no rank	6	0	5	0	1	6	6
Bacteria	no rank	Candidatus Magasanikbacteria	no rank	no rank	20	0	19	0	3	22	22
Bacteria	no rank	Candidatus Margulisbacteria	Candidatus Riflemargulisbacteria	no rank	2	2	2	2	1	10	10
Bacteria	no rank	Candidatus Margulisbacteria	Candidatus Termititenacia	Candidatus Termititenacales	3	0	0	3	1	4	4
Bacteria	no rank	Candidatus Margulisbacteria	no rank	no rank	1	0	1	0	1	2	2
Bacteria	no rank	Candidatus Marinimicrobia	no rank	no rank	32	22	30	24	0	71	71
Bacteria	no rank	Candidatus Melainabacteria	no rank	Candidatus Gastranaerophilales	25	8	25	8	1	89	89
Bacteria	no rank	Candidatus Melainabacteria	no rank	no rank	20	14	20	14	2	200	200
Bacteria	no rank	Candidatus Microgenomates	no rank	no rank	3	0	1	0	2	3	3
Bacteria	no rank	Candidatus Moranbacteria	no rank	no rank	16	0	15	0	2	17	17
Bacteria	no rank	Candidatus Nealsonbacteria	no rank	no rank	4	0	3	1	1	7	7
Bacteria	no rank	Candidatus Niyogibacteria	no rank	no rank	2	0	0	2	0	2	2
Bacteria	no rank	Candidatus Nomurabacteria	no rank	no rank	18	0	18	0	0	18	18
Bacteria	no rank	Candidatus Omnitrophica	no rank	no rank	115	64	115	64	1	640	640
Bacteria	no rank	Candidatus Pacebacteria	no rank	no rank	8	0	7	0	1	8	8
Bacteria	no rank	Candidatus Parcubacteria	no rank	no rank	13	2	12	3	0	19	19
Bacteria	no rank	Candidatus Peregrinibacteria	Candidatus Peribacteria	no rank	4	0	1	0	3	4	4
Bacteria	no rank	Candidatus Peregrinibacteria	no rank	no rank	20	0	12	5	4	22	22
Bacteria	no rank	Candidatus Poribacteria	no rank	no rank	9	1	1	8	4	18	18
Bacteria	no rank	Candidatus Portnoybacteria	no rank	no rank	4	1	2	3	0	5	5
Bacteria	no rank	Candidatus Raymondbacteria	no rank	no rank	4	0	3	1	0	15	15
Bacteria	no rank	Candidatus Riflebacteria	Candidatus Ozemobacteria	no rank	1	1	1	1	0	20	20
Bacteria	no rank	Candidatus Riflebacteria	no rank	no rank	4	2	4	2	0	56	56
Bacteria	no rank	Candidatus Roizmanbacteria	no rank	no rank	16	0	10	0	6	16	16
Bacteria	no rank	Candidatus Rokubacteria	no rank	no rank	83	34	81	36	1	384	384
Bacteria	no rank	Candidatus Ryanbacteria	no rank	no rank	3	0	0	2	1	3	3
Bacteria	no rank	Candidatus Saccharibacteria	no rank	no rank	18	0	12	0	6	19	19
Bacteria	no rank	Candidatus Schekmanbacteria	no rank	no rank	6	3	6	3	0	36	36
Bacteria	no rank	Candidatus Shapirobacteria	no rank	no rank	10	0	10	0	0	10	10
Bacteria	no rank	Candidatus Spechtbacteria	no rank	no rank	1	0	0	1	0	1	1
Bacteria	no rank	Candidatus Staskawiczbacteria	no rank	no rank	1	0	1	0	0	1	1
Bacteria	no rank	Candidatus Sumerlaeota	no rank	no rank	2	1	1	2	0	9	9
Bacteria	no rank	Candidatus Sungbacteria	no rank	no rank	1	0	1	0	0	1	1
Bacteria	no rank	Candidatus Tagabacteria	no rank	no rank	5	0	0	5	0	5	5
Bacteria	no rank	Candidatus Taylorbacteria	no rank	no rank	1	0	0	0	1	1	1
Bacteria	no rank	Candidatus Tectomicrobia	no rank	no rank	6	4	6	4	0	38	30
Bacteria	no rank	Candidatus Terrybacteria	no rank	no rank	3	0	2	1	0	3	3
Bacteria	no rank	Candidatus Uhrbacteria	no rank	no rank	14	0	12	0	2	17	17
Bacteria	no rank	Candidatus Vogelbacteria	no rank	no rank	1	0	0	0	1	1	1
Bacteria	no rank	Candidatus Wallbacteria	no rank	no rank	2	1	2	1	0	32	32
Bacteria	no rank	Candidatus Wirthbacteria	no rank	no rank	1	0	1	0	0	1	1
Bacteria	no rank	Candidatus Woesebacteria	no rank	no rank	19	0	15	0	5	24	24
Bacteria	no rank	Candidatus Wolfebacteria	no rank	no rank	8	3	8	3	1	12	12
Bacteria	no rank	Candidatus Yanofskybacteria	no rank	no rank	8	0	8	0	0	8	8
Bacteria	no rank	Candidatus Yonathbacteria	no rank	no rank	6	0	6	0	0	7	7
Bacteria	no rank	Candidatus Zambryskibacteria	no rank	no rank	14	0	13	1	1	17	17
Bacteria	no rank	Chlamydiae	Chlamydiia	Chlamydiales	368	1	1	368	0	369	369
Bacteria	no rank	Chlamydiae	Chlamydiia	Parachlamydiales	23	2	2	23	2	28	28
Bacteria	no rank	Chlamydiae	no rank	no rank	8	4	4	8	0	13	13
Bacteria	no rank	Chlorobi	Chlorobia	Chlorobiales	36	4	36	4	2	75	75
Bacteria	no rank	Chlorobi	no rank	no rank	6	4	4	6	0	10	10
Bacteria	no rank	Chloroflexi	Anaerolineae	Anaerolineales	42	34	39	37	7	431	431
Bacteria	no rank	Chloroflexi	Anaerolineae	no rank	28	18	24	22	2	189	189
Bacteria	no rank	Chloroflexi	Ardenticatenia	Ardenticatenales	3	3	3	3	0	29	29
Bacteria	no rank	Chloroflexi	Ardenticatenia	no rank	2	2	2	2	0	18	18
Bacteria	no rank	Chloroflexi	Caldilineae	Caldilineales	3	2	3	2	0	8	8
Bacteria	no rank	Chloroflexi	Caldilineae	no rank	3	2	3	2	0	9	9
Bacteria	no rank	Chloroflexi	Candidatus Thermofonsia	no rank	10	8	10	8	0	45	45
Bacteria	no rank	Chloroflexi	Chloroflexia	Chloroflexales	19	17	19	17	2	290	290
Bacteria	no rank	Chloroflexi	Chloroflexia	Herpetosiphonales	3	3	3	3	2	44	44
Bacteria	no rank	Chloroflexi	Dehalococcoidia	Dehalococcoidales	33	0	33	0	1	34	34
Bacteria	no rank	Chloroflexi	Dehalococcoidia	no rank	37	9	36	10	4	113	113
Bacteria	no rank	Chloroflexi	Ktedonobacteria	Ktedonobacterales	14	0	14	0	0	54	54
Bacteria	no rank	Chloroflexi	Ktedonobacteria	Thermogemmatisporales	3	0	3	0	0	11	11
Bacteria	no rank	Chloroflexi	Tepidiformia	no rank	1	1	1	1	1	13	13
Bacteria	no rank	Chloroflexi	Thermoflexia	Thermoflexales	2	2	2	2	0	16	16
Bacteria	no rank	Chloroflexi	Thermoflexia	no rank	1	1	1	1	0	2	2
Bacteria	no rank	Chloroflexi	Thermomicrobia	Sphaerobacterales	4	4	4	4	0	46	46
Bacteria	no rank	Chloroflexi	Thermomicrobia	Thermomicrobiales	2	2	2	2	0	15	15
Bacteria	no rank	Chloroflexi	Thermomicrobia	no rank	1	1	1	1	0	5	5
Bacteria	no rank	Chloroflexi	no rank	no rank	341	194	327	208	6	2828	2828
Bacteria	no rank	Chrysiogenetes	Chrysiogenetes	Chrysiogenales	4	3	4	3	1	69	69
Bacteria	no rank	Coprothermobacterota	Coprothermobacteria	Coprothermobacterales	4	4	4	4	0	14	14
Bacteria	no rank	Cyanobacteria	Gloeobacteria	Gloeobacterales	2	2	2	2	0	9	9
Bacteria	no rank	Cyanobacteria	no rank	Chroococcales	114	84	101	97	10	892	892
Bacteria	no rank	Cyanobacteria	no rank	Chroococcidiopsidales	6	6	6	6	3	125	125
Bacteria	no rank	Cyanobacteria	no rank	Gloeoemargaritales	1	1	1	1	0	11	11
Bacteria	no rank	Cyanobacteria	no rank	Nostocales	206	185	199	192	33	2410	2405
Bacteria	no rank	Cyanobacteria	no rank	Oscillatoriales	96	76	96	76	6	1918	1917
Bacteria	no rank	Cyanobacteria	no rank	Pleurocapsales	9	9	9	9	3	230	230
Bacteria	no rank	Cyanobacteria	no rank	Spirulinales	3	2	3	2	0	94	94
Bacteria	no rank	Cyanobacteria	no rank	Synechococcales	248	124	136	236	18	2199	2199
Bacteria	no rank	Cyanobacteria	no rank	no rank	51	25	48	28	2	613	613
Bacteria	no rank	Deferribacteres	Deferribacteres	Deferribacterales	13	13	13	13	0	278	278
Bacteria	no rank	Deinococcus-Thermus	Deinococci	Deinococcales	65	50	65	50	12	1848	1846
Bacteria	no rank	Deinococcus-Thermus	Deinococci	Thermales	104	86	104	86	2	940	940
Bacteria	no rank	Deinococcus-Thermus	no rank	no rank	1	0	1	0	0	2	2
Bacteria	no rank	Dictyoglomi	Dictyoglomia	Dictyoglomales	5	3	4	4	0	35	35
Bacteria	no rank	Elusimicrobia	Elusimicrobia	Elusimicrobiales	2	0	2	0	0	6	6
Bacteria	no rank	Elusimicrobia	Endomicrobia	Endomicrobiales	3	1	1	3	0	9	9
Bacteria	no rank	Elusimicrobia	no rank	no rank	66	44	65	45	7	368	368
Bacteria	no rank	Fibrobacteres	Chitinivibrionia	Chitinivibrionales	1	1	1	1	0	12	12
Bacteria	no rank	Fibrobacteres	Fibrobacteria	Fibrobacterales	43	43	43	43	5	1123	1122
Bacteria	no rank	Fibrobacteres	no rank	no rank	1	1	1	1	0	9	9
Bacteria	no rank	Firmicutes	Bacilli	Bacillales	23086	22865	22968	22983	1209	137041	136977
Bacteria	no rank	Firmicutes	Bacilli	Lactobacillales	22131	4557	4618	22060	1407	34147	34125
Bacteria	no rank	Firmicutes	Bacilli	no rank	8	8	8	8	0	32	32
Bacteria	no rank	Firmicutes	Clostridia	Candidatus Borkfalkiales	1	1	1	1	0	6	6
Bacteria	no rank	Firmicutes	Clostridia	Clostridiales	5267	4955	5195	5025	369	119419	118107
Bacteria	no rank	Firmicutes	Clostridia	Halanaerobiales	53	49	53	49	6	1038	1038
Bacteria	no rank	Firmicutes	Clostridia	Natranaerobiales	2	2	2	2	0	25	25
Bacteria	no rank	Firmicutes	Clostridia	Thermoanaerobacterales	134	128	134	128	15	1272	1269
Bacteria	no rank	Firmicutes	Clostridia	no rank	22	15	20	17	1	234	234
Bacteria	no rank	Firmicutes	Erysipelotrichia	Erysipelotrichales	226	171	181	215	32	3577	3541
Bacteria	no rank	Firmicutes	Limnochordia	Limnochordales	1	1	1	1	0	6	6
Bacteria	no rank	Firmicutes	Negativicutes	Acidaminococcales	50	21	21	50	2	269	242
Bacteria	no rank	Firmicutes	Negativicutes	Selenomonadales	110	96	97	109	8	1871	1843
Bacteria	no rank	Firmicutes	Negativicutes	Veillonellales	153	45	48	147	19	487	467
Bacteria	no rank	Firmicutes	Tissierellia	Tissierellales	158	37	38	156	8	384	384
Bacteria	no rank	Firmicutes	Tissierellia	no rank	15	5	5	15	2	103	103
Bacteria	no rank	Firmicutes	no rank	no rank	133	102	127	108	13	1773	1502
Bacteria	no rank	Fusobacteria	Fusobacteriia	Fusobacteriales	256	35	36	255	11	748	731
Bacteria	no rank	Fusobacteria	Fusobacteriia	no rank	2	1	2	1	0	15	15
Bacteria	no rank	Fusobacteria	no rank	no rank	1	0	0	1	0	1	1
Bacteria	no rank	Gemmatimonadetes	Gemmatimonadetes	Gemmatimonadales	21	10	21	10	0	139	139
Bacteria	no rank	Gemmatimonadetes	no rank	no rank	92	49	90	51	0	846	846
Bacteria	no rank	Ignavibacteriae	Ignavibacteria	Ignavibacteriales	15	12	15	12	0	28	28
Bacteria	no rank	Ignavibacteriae	Ignavibacteria	no rank	27	11	21	17	5	45	45
Bacteria	no rank	Ignavibacteriae	no rank	no rank	10	7	9	8	1	22	22
Bacteria	no rank	Kiritimatiellaeota	Kiritimatiellae	Kiritimatiellales	5	5	5	5	0	14	14
Bacteria	no rank	Lentisphaerae	Lentisphaeria	Lentisphaerales	2	1	1	2	1	6	6
Bacteria	no rank	Lentisphaerae	Lentisphaeria	Victivallales	3	0	0	3	0	3	3
Bacteria	no rank	Lentisphaerae	no rank	no rank	12	10	11	11	1	28	28
Bacteria	no rank	Nitrospinae	Nitrospinia	Nitrospinales	6	0	6	0	0	38	38
Bacteria	no rank	Nitrospinae	no rank	no rank	11	4	11	4	0	72	72
Bacteria	no rank	Nitrospirae	Nitrospira	Nitrospirales	73	23	73	23	7	774	760
Bacteria	no rank	Nitrospirae	Nitrospira	no rank	5	5	5	5	0	41	41
Bacteria	no rank	Nitrospirae	no rank	no rank	92	27	92	27	2	633	633
Bacteria	no rank	Planctomycetes	Candidatus Brocadiae	Candidatus Brocadiales	21	16	21	16	1	251	251
Bacteria	no rank	Planctomycetes	Candidatus Brocadiae	no rank	1	1	1	1	0	2	2
Bacteria	no rank	Planctomycetes	Phycisphaerae	Phycisphaerales	15	13	15	13	0	66	66
Bacteria	no rank	Planctomycetes	Phycisphaerae	Sedimentisphaerales	5	5	5	5	0	11	11
Bacteria	no rank	Planctomycetes	Phycisphaerae	no rank	5	4	5	4	2	26	26
Bacteria	no rank	Planctomycetes	Planctomycetia	Gemmatales	6	6	6	6	1	30	30
Bacteria	no rank	Planctomycetes	Planctomycetia	Isosphaerales	7	7	7	7	0	63	63
Bacteria	no rank	Planctomycetes	Planctomycetia	Pirellulales	37	35	37	35	11	374	373
Bacteria	no rank	Planctomycetes	Planctomycetia	Planctomycetales	31	19	26	24	2	129	129
Bacteria	no rank	Planctomycetes	Planctomycetia	no rank	2	1	2	1	0	9	9
Bacteria	no rank	Planctomycetes	no rank	no rank	227	163	214	176	12	1285	1285
Bacteria	no rank	Proteobacteria	Acidithiobacillia	Acidithiobacillales	46	0	46	0	3	670	670
Bacteria	no rank	Proteobacteria	Alphaproteobacteria	Caulobacterales	185	1	185	1	31	1482	1482
Bacteria	no rank	Proteobacteria	Alphaproteobacteria	Emcibacterales	4	0	4	0	0	41	41
Bacteria	no rank	Proteobacteria	Alphaproteobacteria	Holosporales	9	0	9	0	0	26	26
Bacteria	no rank	Proteobacteria	Alphaproteobacteria	Kiloniellales	7	0	7	0	2	83	83
Bacteria	no rank	Proteobacteria	Alphaproteobacteria	Kordiimonadales	8	0	8	0	1	88	85
Bacteria	no rank	Proteobacteria	Alphaproteobacteria	Magnetococcales	3	0	3	0	0	123	123
Bacteria	no rank	Proteobacteria	Alphaproteobacteria	Minwuiales	2	0	2	0	0	18	18
Bacteria	no rank	Proteobacteria	Alphaproteobacteria	Parvularculales	6	0	6	0	3	36	36
Bacteria	no rank	Proteobacteria	Alphaproteobacteria	Pelagibacterales	1	0	1	0	0	1	1
Bacteria	no rank	Proteobacteria	Alphaproteobacteria	Rhizobiales	5004	9	4999	9	966	108465	108390
Bacteria	no rank	Proteobacteria	Alphaproteobacteria	Rhodobacterales	1166	4	1163	4	235	8296	8293
Bacteria	no rank	Proteobacteria	Alphaproteobacteria	Rhodospirillales	491	7	476	8	98	7882	7862
Bacteria	no rank	Proteobacteria	Alphaproteobacteria	Rhodothalassiales	1	0	1	0	0	8	8
Bacteria	no rank	Proteobacteria	Alphaproteobacteria	Rickettsiales	313	0	311	1	1	337	335
Bacteria	no rank	Proteobacteria	Alphaproteobacteria	Sneathiellales	3	0	3	0	1	33	33
Bacteria	no rank	Proteobacteria	Alphaproteobacteria	Sphingomonadales	868	0	868	0	181	13096	13088
Bacteria	no rank	Proteobacteria	Alphaproteobacteria	no rank	169	0	167	0	26	1350	1315
Bacteria	no rank	Proteobacteria	Betaproteobacteria	Burkholderiales	6166	2	6160	2	891	114192	114054
Bacteria	no rank	Proteobacteria	Betaproteobacteria	Ferrovales	7	0	7	0	0	72	72
Bacteria	no rank	Proteobacteria	Betaproteobacteria	Neisseriales	157	0	133	1	31	4310	4309
Bacteria	no rank	Proteobacteria	Betaproteobacteria	Nitrosomonadales	252	0	252	0	27	5732	5732
Bacteria	no rank	Proteobacteria	Betaproteobacteria	Rhodocyclales	94	1	93	1	23	3725	3725
Bacteria	no rank	Proteobacteria	Betaproteobacteria	no rank	154	1	153	1	11	2616	2616
Bacteria	no rank	Proteobacteria	Candidatus Lambdaproteobacteria	no rank	4	2	4	2	0	30	30
Bacteria	no rank	Proteobacteria	Candidatus Muproteobacteria	no rank	14	0	14	0	0	190	190
Bacteria	no rank	Proteobacteria	Deltaproteobacteria	Bradymonadales	12	11	12	11	2	124	124
Bacteria	no rank	Proteobacteria	Deltaproteobacteria	Candidatus Acidulodesulfobacterales	3	3	3	3	0	56	56
Bacteria	no rank	Proteobacteria	Deltaproteobacteria	Desulfarculales	4	4	4	4	1	78	78
Bacteria	no rank	Proteobacteria	Deltaproteobacteria	Desulfobacterales	140	112	139	113	18	1967	1961
Bacteria	no rank	Proteobacteria	Deltaproteobacteria	Desulfovibrionales	129	125	128	126	15	3069	3015
Bacteria	no rank	Proteobacteria	Deltaproteobacteria	Desulfurellales	9	7	9	7	1	161	161
Bacteria	no rank	Proteobacteria	Deltaproteobacteria	Desulfuromonadales	80	70	80	70	11	2075	2073
Bacteria	no rank	Proteobacteria	Deltaproteobacteria	Myxococcales	125	105	124	106	64	1872	1871
Bacteria	no rank	Proteobacteria	Deltaproteobacteria	Syntrophobacterales	54	41	54	41	1	367	367
Bacteria	no rank	Proteobacteria	Deltaproteobacteria	no rank	323	193	308	208	18	2432	2413
Bacteria	no rank	Proteobacteria	Epsilonproteobacteria	Campylobacterales	3552	1	3545	1	96	12972	12962
Bacteria	no rank	Proteobacteria	Epsilonproteobacteria	Nautiliales	14	0	14	0	0	305	305
Bacteria	no rank	Proteobacteria	Epsilonproteobacteria	no rank	35	1	35	1	1	420	420
Bacteria	no rank	Proteobacteria	Gammaproteobacteria	Acidiferrobacterales	5	0	5	0	1	166	166
Bacteria	no rank	Proteobacteria	Gammaproteobacteria	Aeromonadales	437	0	437	0	86	17880	17869
Bacteria	no rank	Proteobacteria	Gammaproteobacteria	Alteromonadales	924	7	924	7	133	41973	41911
Bacteria	no rank	Proteobacteria	Gammaproteobacteria	Cardiobacteriales	5	0	0	0	5	5	5
Bacteria	no rank	Proteobacteria	Gammaproteobacteria	Cellvibrionales	119	0	119	0	11	2569	2569
Bacteria	no rank	Proteobacteria	Gammaproteobacteria	Chromatiales	215	0	215	0	14	7661	7660
Bacteria	no rank	Proteobacteria	Gammaproteobacteria	Enterobacterales	46718	45	46709	45	8264	754458	754187
Bacteria	no rank	Proteobacteria	Gammaproteobacteria	Immundisolibacterales	1	0	1	0	0	13	13
Bacteria	no rank	Proteobacteria	Gammaproteobacteria	Legionellales	1092	0	1092	0	30	18141	18140
Bacteria	no rank	Proteobacteria	Gammaproteobacteria	Methylococcales	100	1	100	1	22	2946	2946
Bacteria	no rank	Proteobacteria	Gammaproteobacteria	Nevskiales	26	0	26	0	2	519	519
Bacteria	no rank	Proteobacteria	Gammaproteobacteria	Oceanospirillales	462	1	462	1	51	15636	15512
Bacteria	no rank	Proteobacteria	Gammaproteobacteria	Orbales	75	0	71	0	5	87	87
Bacteria	no rank	Proteobacteria	Gammaproteobacteria	Pasteurellales	1002	0	966	0	85	1053	1052
Bacteria	no rank	Proteobacteria	Gammaproteobacteria	Pseudomonadales	13205	13	13188	13	3734	333344	333090
Bacteria	no rank	Proteobacteria	Gammaproteobacteria	Salinisphaerales	9	0	8	0	3	226	226
Bacteria	no rank	Proteobacteria	Gammaproteobacteria	Thiotrichales	215	0	214	1	14	2945	2943
Bacteria	no rank	Proteobacteria	Gammaproteobacteria	Vibrionales	4260	5	4260	5	1169	184562	184412
Bacteria	no rank	Proteobacteria	Gammaproteobacteria	Xanthomonadales	2268	2	2268	2	467	52766	52723
Bacteria	no rank	Proteobacteria	Gammaproteobacteria	no rank	401	1	395	1	29	7431	7431
Bacteria	no rank	Proteobacteria	Hydrogenophilalia	Hydrogenophilales	38	1	38	1	3	665	665
Bacteria	no rank	Proteobacteria	Oligoflexia	Bacteriovoracales	17	17	17	17	2	53	53
Bacteria	no rank	Proteobacteria	Oligoflexia	Bdellovibrionales	36	27	36	27	2	161	161
Bacteria	no rank	Proteobacteria	Oligoflexia	Oligoflexales	3	3	3	3	0	42	42
Bacteria	no rank	Proteobacteria	Oligoflexia	Silvanigrellales	3	3	3	3	0	6	6
Bacteria	no rank	Proteobacteria	Zetaproteobacteria	Mariprofundales	9	9	9	9	0	222	222
Bacteria	no rank	Proteobacteria	Zetaproteobacteria	no rank	26	16	26	16	0	288	288
Bacteria	no rank	Proteobacteria	no rank	no rank	68	19	66	21	5	882	879
Bacteria	no rank	Rhodothermaeota	Rhodothermia	Rhodothermales	5	4	4	5	1	14	14
Bacteria	no rank	Rhodothermaeota	no rank	no rank	2	0	0	2	0	2	2
Bacteria	no rank	Spirochaetes	Spirochaetia	Brachyspirales	82	80	82	80	1	345	336
Bacteria	no rank	Spirochaetes	Spirochaetia	Brevinematales	1	1	1	1	0	2	2
Bacteria	no rank	Spirochaetes	Spirochaetia	Leptospirales	628	624	628	624	17	7986	7974
Bacteria	no rank	Spirochaetes	Spirochaetia	Spirochaetales	371	327	359	339	9	2046	2045
Bacteria	no rank	Spirochaetes	Spirochaetia	no rank	2	1	2	1	0	4	4
Bacteria	no rank	Spirochaetes	no rank	no rank	45	31	45	31	5	717	717
Bacteria	no rank	Synergistetes	Synergistia	Synergistales	41	38	41	38	0	436	436
Bacteria	no rank	Synergistetes	no rank	no rank	2	1	2	1	0	27	27
Bacteria	no rank	Tenericutes	Mollicutes	Acholeplasmatales	50	25	27	48	0	349	346
Bacteria	no rank	Tenericutes	Mollicutes	Anaeroplasmatales	1	1	1	1	0	20	20
Bacteria	no rank	Tenericutes	Mollicutes	Entomoplasmatales	2	0	0	0	2	2	2
Bacteria	no rank	Tenericutes	Mollicutes	Mycoplasmatales	443	5	5	443	10	474	462
Bacteria	no rank	Tenericutes	no rank	no rank	28	13	27	14	0	276	276
Bacteria	no rank	Thermodesulfobacteria	Thermodesulfobacteria	Thermodesulfobacteriales	20	15	20	15	0	227	227
Bacteria	no rank	Thermodesulfobacteria	no rank	no rank	5	3	5	3	0	30	30
Bacteria	no rank	Thermotogae	Thermotogae	Kosmotogales	18	15	18	15	5	227	227
Bacteria	no rank	Thermotogae	Thermotogae	Mesoaciditogales	3	2	3	2	0	20	20
Bacteria	no rank	Thermotogae	Thermotogae	Petrotogales	28	26	28	26	0	251	251
Bacteria	no rank	Thermotogae	Thermotogae	Thermotogales	66	60	66	60	0	778	778
Bacteria	no rank	Thermotogae	no rank	no rank	7	6	7	6	0	43	43
Bacteria	no rank	Verrucomicrobia	Methylacidiphilae	Methylacidiphilales	11	0	0	11	0	11	11
Bacteria	no rank	Verrucomicrobia	Opitutae	Opitutales	19	14	14	19	2	37	37
Bacteria	no rank	Verrucomicrobia	Opitutae	Puniceicoccales	11	0	0	11	1	14	13
Bacteria	no rank	Verrucomicrobia	Opitutae	no rank	8	2	2	8	0	10	10
Bacteria	no rank	Verrucomicrobia	Spartobacteria	Chthoniobacterales	4	0	0	4	0	4	4
Bacteria	no rank	Verrucomicrobia	Spartobacteria	no rank	4	1	1	4	0	5	5
Bacteria	no rank	Verrucomicrobia	Verrucomicrobiae	Verrucomicrobiales	238	6	8	235	6	262	261
Bacteria	no rank	Verrucomicrobia	Verrucomicrobiae	no rank	5	0	0	4	1	5	5
Bacteria	no rank	Verrucomicrobia	no rank	no rank	137	16	23	130	4	185	185
Bacteria	no rank	candidate division CPR2	no rank	no rank	3	0	3	0	0	7	7
Bacteria	no rank	candidate division CPR3	no rank	no rank	3	0	3	0	0	3	3
Bacteria	no rank	candidate division KD3-62	no rank	no rank	1	1	1	1	0	3	3
Bacteria	no rank	candidate division LCP-89	no rank	no rank	1	1	1	1	0	4	4
Bacteria	no rank	candidate division NC10	no rank	no rank	7	3	6	3	1	25	25
Bacteria	no rank	candidate division WOR-3	no rank	no rank	8	5	6	7	0	43	43
Bacteria	no rank	candidate division WWE3	no rank	no rank	23	0	7	13	3	23	23
Bacteria	no rank	candidate division Zixibacteria	no rank	no rank	24	19	22	21	0	91	91
Bacteria	no rank	no rank	no rank	Haloplasmatales	2	1	2	1	2	28	28
Bacteria	no rank	no rank	no rank	no rank	394	157	338	204	33	3070	3070
Eukaryota	Fungi	Ascomycota	Dothideomycetes	Pleosporales	2	0	2	0	0	5	5
Eukaryota	Fungi	Ascomycota	Eurotiomycetes	Onygenales	1	0	1	0	0	1	1
Eukaryota	Fungi	Ascomycota	Sordariomycetes	Diaporthales	1	0	0	1	0	1	1
Eukaryota	Fungi	Ascomycota	Sordariomycetes	Hypocreales	2	0	2	0	0	11	11
Eukaryota	Fungi	Ascomycota	Sordariomycetes	Xylariales	3	0	3	0	2	22	22
Eukaryota	Fungi	Basidiomycota	Agaricomycetes	Agaricales	2	0	2	0	0	2	2
Eukaryota	Fungi	Basidiomycota	Agaricomycetes	Cantharellales	1	0	1	0	0	1	1
Eukaryota	Fungi	Basidiomycota	Agaricomycetes	Hymenochaetales	1	0	1	0	0	1	1
Eukaryota	Fungi	Chytridiomycota	Chytridiomycetes	Rhizophydiales	1	0	0	1	0	1	1
Eukaryota	Fungi	Microsporidia	no rank	no rank	1	0	0	0	1	1	1
Eukaryota	Fungi	Mucoromycota	Glomeromycetes	Diversisporales	1	0	1	0	0	9	9
Eukaryota	Fungi	Mucoromycota	Glomeromycetes	Glomerales	5	0	5	0	0	7	7
Eukaryota	Metazoa	Annelida	Polychaeta	Capitellida	1	0	1	0	0	6	6
Eukaryota	Metazoa	Arthropoda	Arachnida	Araneae	1	0	1	0	0	17	17
Eukaryota	Metazoa	Arthropoda	Arachnida	Scorpiones	1	0	0	1	0	1	1
Eukaryota	Metazoa	Arthropoda	Branchiopoda	Diplostraca	1	0	1	0	0	2	2
Eukaryota	Metazoa	Arthropoda	Hexanauplia	Calanoida	1	0	0	0	1	1	1
Eukaryota	Metazoa	Arthropoda	Insecta	Coleoptera	1	0	1	0	0	1	1
Eukaryota	Metazoa	Arthropoda	Insecta	Diptera	3	0	3	0	0	7	7
Eukaryota	Metazoa	Arthropoda	Insecta	Hemiptera	2	1	2	1	0	8	8
Eukaryota	Metazoa	Arthropoda	Insecta	Hymenoptera	4	0	4	0	0	8	8
Eukaryota	Metazoa	Arthropoda	Insecta	Lepidoptera	2	0	1	1	0	22	22
Eukaryota	Metazoa	Arthropoda	Malacostraca	Amphipoda	1	0	1	0	0	13	13
Eukaryota	Metazoa	Chordata	Actinopteri	Characiformes	1	0	1	0	0	1	1
Eukaryota	Metazoa	Chordata	Mammalia	Artiodactyla	13	0	0	0	13	18	18
Eukaryota	Metazoa	Chordata	Mammalia	Carnivora	6	0	0	0	6	9	9
Eukaryota	Metazoa	Chordata	Mammalia	Chiroptera	8	0	0	0	8	8	8
Eukaryota	Metazoa	Chordata	Mammalia	Dasyuromorphia	1	0	0	0	1	1	1
Eukaryota	Metazoa	Chordata	Mammalia	Diprotodontia	2	0	0	0	2	3	3
Eukaryota	Metazoa	Chordata	Mammalia	Eulipotyphla	2	0	0	0	2	2	2
Eukaryota	Metazoa	Chordata	Mammalia	Lagomorpha	1	0	0	0	1	1	1
Eukaryota	Metazoa	Chordata	Mammalia	Perissodactyla	1	0	0	0	1	2	2
Eukaryota	Metazoa	Chordata	Mammalia	Pholidota	1	0	0	0	1	2	2
Eukaryota	Metazoa	Chordata	Mammalia	Primates	3	0	0	0	3	3	3
Eukaryota	Metazoa	Chordata	Mammalia	Rodentia	14	0	0	0	14	17	17
Eukaryota	Metazoa	Chordata	Mammalia	Scandentia	1	0	0	0	1	1	2
Eukaryota	Metazoa	Chordata	no rank	Testudines	1	0	0	0	1	1	1
Eukaryota	Metazoa	Cnidaria	Anthozoa	Actiniaria	1	0	1	0	0	12	12
Eukaryota	Metazoa	Cnidaria	Anthozoa	Scleractinia	1	0	0	0	1	1	2
Eukaryota	Metazoa	Cnidaria	Myxozoa	Bivalvulida	1	0	1	0	0	2	2
Eukaryota	Metazoa	Echinodermata	Holothuroidea	Aspidochirotida	1	0	0	0	1	3	3
Eukaryota	Metazoa	Mollusca	Bivalvia	Mytiloida	1	0	0	0	1	1	1
Eukaryota	Metazoa	Mollusca	Gastropoda	Architaenioglossa	1	0	0	0	1	4	4
Eukaryota	Metazoa	Nematoda	Chromadorea	Rhabditida	2	0	2	0	1	10	10
Eukaryota	Metazoa	Nematoda	Chromadorea	Strongylida	1	0	1	0	0	1	1
Eukaryota	Metazoa	Placozoa	no rank	no rank	1	0	1	0	0	3	3
Eukaryota	Viridiplantae	Chlorophyta	Mamiellophyceae	Mamiellales	1	0	1	0	0	3	3
Eukaryota	Viridiplantae	Streptophyta	Magnoliopsida	Brassicales	1	0	1	0	0	3	3
Eukaryota	Viridiplantae	Streptophyta	Magnoliopsida	Caryophyllales	2	0	2	0	0	4	4
Eukaryota	Viridiplantae	Streptophyta	Magnoliopsida	Fabales	1	0	1	0	0	1	1
Eukaryota	Viridiplantae	Streptophyta	Magnoliopsida	Lamiales	1	0	1	0	0	1	1
Eukaryota	Viridiplantae	Streptophyta	Magnoliopsida	Malpighiales	1	0	1	0	0	13	13
Eukaryota	Viridiplantae	Streptophyta	Magnoliopsida	Malvales	2	0	2	0	0	4	4
Eukaryota	Viridiplantae	Streptophyta	Magnoliopsida	Poales	1	0	1	0	0	3	3
Eukaryota	Viridiplantae	Streptophyta	Magnoliopsida	Rosales	2	0	2	0	0	2	2
Eukaryota	Viridiplantae	Streptophyta	Magnoliopsida	Zingiberales	1	0	1	0	1	7	7
Eukaryota	no rank	Apicomplexa	Aconoidasida	Haemosporida	1	0	0	1	0	1	1
Eukaryota	no rank	Euglenozoa	no rank	Kinetoplastida	1	0	1	0	0	1	1
Eukaryota	no rank	Evosea	Eumycetozoa	Acytosteliales	3	0	3	0	0	16	16
Eukaryota	no rank	Evosea	Eumycetozoa	Dictyosteliales	2	0	2	0	0	2	2
Eukaryota	no rank	Foraminifera	no rank	no rank	1	1	1	1	0	2	2
Eukaryota	no rank	Haptista	Haptophyta	Isochrysidales	1	0	1	0	0	4	4
Eukaryota	no rank	no rank	Choanoflagellata	Craspedida	2	0	0	1	1	2	2
Eukaryota	no rank	no rank	Dinophyceae	Suessiales	1	0	0	1	0	1	1
Eukaryota	no rank	no rank	Oomycetes	Peronosporales	1	0	1	0	0	1	1
Viruses	no rank	no rank	no rank	Caudovirales	7	0	7	0	0	7	7

## Sheet: genus
domain	kingdom	phylum	class	order	family	genus	genomes	dac_n_ggdef	GGDEF	DAC	SMODS	loci	proteins
Archaea	no rank	Candidatus Aenigmarchaeota	no rank	no rank	no rank	no rank	5	1	4	2	0	6	6
Archaea	no rank	Candidatus Bathyarchaeota	no rank	no rank	no rank	no rank	8	0	4	3	1	11	11
Archaea	no rank	Candidatus Diapherotrites	no rank	no rank	no rank	no rank	4	0	4	0	0	6	6
Archaea	no rank	Candidatus Geothermarchaeota	no rank	no rank	no rank	no rank	1	0	1	0	0	1	1
Archaea	no rank	Candidatus Heimdallarchaeota	no rank	no rank	no rank	no rank	3	0	0	0	3	3	3
Archaea	no rank	Candidatus Lokiarchaeota	no rank	no rank	no rank	no rank	3	0	0	1	2	4	4
Archaea	no rank	Candidatus Micrarchaeota	no rank	no rank	no rank	Candidatus Micrarchaeum	2	0	0	0	2	2	2
Archaea	no rank	Candidatus Micrarchaeota	no rank	no rank	no rank	no rank	11	0	11	0	0	11	11
Archaea	no rank	Candidatus Thorarchaeota	no rank	no rank	no rank	no rank	2	1	2	1	0	3	3
Archaea	no rank	Candidatus Woesearchaeota	no rank	no rank	no rank	no rank	30	4	27	6	3	52	52
Archaea	no rank	Crenarchaeota	Thermoprotei	Desulfurococcales	Desulfurococcaceae	Thermogladius	1	0	0	0	1	1	1
Archaea	no rank	Crenarchaeota	Thermoprotei	Sulfolobales	Sulfolobaceae	Saccharolobus	13	0	0	0	13	13	13
Archaea	no rank	Crenarchaeota	Thermoprotei	Sulfolobales	Sulfolobaceae	Sulfolobus	19	0	0	0	19	19	19
Archaea	no rank	Crenarchaeota	Thermoprotei	Thermoproteales	Thermofilaceae	Thermofilum	2	0	0	0	2	2	2
Archaea	no rank	Crenarchaeota	Thermoprotei	no rank	no rank	no rank	3	0	1	1	1	3	3
Archaea	no rank	Crenarchaeota	no rank	no rank	no rank	no rank	1	0	1	0	0	1	1
Archaea	no rank	Euryarchaeota	Archaeoglobi	Archaeoglobales	Archaeoglobaceae	Archaeoglobus	7	0	0	7	0	7	7
Archaea	no rank	Euryarchaeota	Archaeoglobi	Archaeoglobales	Archaeoglobaceae	Ferroglobus	1	0	0	1	0	1	1
Archaea	no rank	Euryarchaeota	Archaeoglobi	Archaeoglobales	Archaeoglobaceae	Geoglobus	2	0	0	2	0	2	2
Archaea	no rank	Euryarchaeota	Archaeoglobi	Archaeoglobales	no rank	no rank	6	0	0	6	0	6	6
Archaea	no rank	Euryarchaeota	Candidatus Methanofastidiosa	no rank	no rank	Candidatus Methanofastidiosum	5	1	2	4	0	6	6
Archaea	no rank	Euryarchaeota	Candidatus Methanoliparia	Candidatus Methanoliparales	Candidatus Methanoliparaceae	Candidatus Methanoliparum	1	0	0	1	0	1	1
Archaea	no rank	Euryarchaeota	Candidatus Methanoliparia	Candidatus Methanoliparales	Candidatus Methanollivieraceae	Candidatus Methanolliviera	1	0	0	1	1	2	2
Archaea	no rank	Euryarchaeota	Candidatus Methanoliparia	Candidatus Methanoliparales	Candidatus Methanollivieraceae	no rank	2	0	0	0	2	2	2
Archaea	no rank	Euryarchaeota	Candidatus Poseidoniia	Candidatus Poseidoniales	no rank	no rank	22	0	0	21	1	22	22
Archaea	no rank	Euryarchaeota	Hadesarchaea	no rank	no rank	no rank	10	1	1	10	1	12	12
Archaea	no rank	Euryarchaeota	Halobacteria	Halobacteriales	Haloarculaceae	Halapricum	2	0	0	2	0	2	2
Archaea	no rank	Euryarchaeota	Halobacteria	Halobacteriales	Haloarculaceae	Haloarcula	27	0	0	27	2	42	42
Archaea	no rank	Euryarchaeota	Halobacteria	Halobacteriales	Haloarculaceae	Halomicroarcula	1	0	0	1	1	2	2
Archaea	no rank	Euryarchaeota	Halobacteria	Halobacteriales	Haloarculaceae	Halomicrobium	6	0	0	6	0	6	6
Archaea	no rank	Euryarchaeota	Halobacteria	Halobacteriales	Haloarculaceae	Halorhabdus	5	0	0	5	0	5	5
Archaea	no rank	Euryarchaeota	Halobacteria	Halobacteriales	Haloarculaceae	Halorientalis	4	0	0	4	1	5	5
Archaea	no rank	Euryarchaeota	Halobacteria	Halobacteriales	Haloarculaceae	Halosimplex	3	0	0	3	2	7	7
Archaea	no rank	Euryarchaeota	Halobacteria	Halobacteriales	Haloarculaceae	Natronomonas	7	0	0	7	0	10	10
Archaea	no rank	Euryarchaeota	Halobacteria	Halobacteriales	Haloarculaceae	no rank	1	0	0	1	0	1	1
Archaea	no rank	Euryarchaeota	Halobacteria	Halobacteriales	Halobacteriaceae	Haladaptatus	7	0	0	7	1	9	9
Archaea	no rank	Euryarchaeota	Halobacteria	Halobacteriales	Halobacteriaceae	Halalkalicoccus	4	0	0	4	0	4	4
Archaea	no rank	Euryarchaeota	Halobacteria	Halobacteriales	Halobacteriaceae	Halanaeroarchaeum	2	0	0	2	0	2	2
Archaea	no rank	Euryarchaeota	Halobacteria	Halobacteriales	Halobacteriaceae	Halarchaeum	3	2	2	3	0	5	5
Archaea	no rank	Euryarchaeota	Halobacteria	Halobacteriales	Halobacteriaceae	Haloarchaeobius	1	0	0	1	0	1	1
Archaea	no rank	Euryarchaeota	Halobacteria	Halobacteriales	Halobacteriaceae	Halobacterium	15	0	0	15	1	16	16
Archaea	no rank	Euryarchaeota	Halobacteria	Halobacteriales	Halobacteriaceae	Halodesulfurarchaeum	2	0	0	2	0	2	2
Archaea	no rank	Euryarchaeota	Halobacteria	Halobacteriales	Halobacteriaceae	Halomarina	1	0	0	1	0	1	1
Archaea	no rank	Euryarchaeota	Halobacteria	Halobacteriales	Halobacteriaceae	Halorussus	9	0	0	9	1	10	10
Archaea	no rank	Euryarchaeota	Halobacteria	Halobacteriales	Halobacteriaceae	Halostella	5	0	0	5	2	9	9
Archaea	no rank	Euryarchaeota	Halobacteria	Halobacteriales	Halobacteriaceae	Halovenus	1	0	0	1	1	2	2
Archaea	no rank	Euryarchaeota	Halobacteria	Halobacteriales	Halobacteriaceae	Natronoarchaeum	1	0	0	1	0	1	1
Archaea	no rank	Euryarchaeota	Halobacteria	Halobacteriales	Halobacteriaceae	Salarchaeum	1	0	0	1	0	1	1
Archaea	no rank	Euryarchaeota	Halobacteria	Halobacteriales	Halobacteriaceae	no rank	2	0	0	2	0	4	4
Archaea	no rank	Euryarchaeota	Halobacteria	Halobacteriales	Halococcaceae	Halococcus	9	0	0	9	1	13	13
Archaea	no rank	Euryarchaeota	Halobacteria	Halobacteriales	no rank	no rank	59	2	2	59	0	70	70
Archaea	no rank	Euryarchaeota	Halobacteria	Haloferacales	Haloferacaceae	Halegenticoccus	1	0	0	1	0	2	2
Archaea	no rank	Euryarchaeota	Halobacteria	Haloferacales	Haloferacaceae	Halobellus	8	1	1	8	2	15	15
Archaea	no rank	Euryarchaeota	Halobacteria	Haloferacales	Haloferacaceae	Haloferax	40	2	2	39	6	58	58
Archaea	no rank	Euryarchaeota	Halobacteria	Haloferacales	Haloferacaceae	Halogeometricum	6	0	0	6	1	10	10
Archaea	no rank	Euryarchaeota	Halobacteria	Haloferacales	Haloferacaceae	Halogranum	4	0	0	4	1	6	6
Archaea	no rank	Euryarchaeota	Halobacteria	Haloferacales	Haloferacaceae	Halopelagius	3	0	0	3	0	3	3
Archaea	no rank	Euryarchaeota	Halobacteria	Haloferacales	Haloferacaceae	Haloplanus	7	0	0	7	2	12	12
Archaea	no rank	Euryarchaeota	Halobacteria	Haloferacales	Haloferacaceae	Haloprofundus	3	0	0	3	0	4	4
Archaea	no rank	Euryarchaeota	Halobacteria	Haloferacales	Haloferacaceae	Haloquadratum	5	0	0	5	0	9	9
Archaea	no rank	Euryarchaeota	Halobacteria	Haloferacales	Haloferacaceae	no rank	3	0	0	3	0	9	9
Archaea	no rank	Euryarchaeota	Halobacteria	Haloferacales	Halorubraceae	Candidatus Halobonum	1	0	0	1	0	1	1
Archaea	no rank	Euryarchaeota	Halobacteria	Haloferacales	Halorubraceae	Halobaculum	1	0	0	1	0	2	2
Archaea	no rank	Euryarchaeota	Halobacteria	Haloferacales	Halorubraceae	Halohasta	2	0	0	2	2	4	4
Archaea	no rank	Euryarchaeota	Halobacteria	Haloferacales	Halorubraceae	Halolamina	5	0	0	5	0	5	5
Archaea	no rank	Euryarchaeota	Halobacteria	Haloferacales	Halorubraceae	Halonotius	6	0	0	6	0	6	6
Archaea	no rank	Euryarchaeota	Halobacteria	Haloferacales	Halorubraceae	Haloparvum	1	0	0	1	0	2	2
Archaea	no rank	Euryarchaeota	Halobacteria	Haloferacales	Halorubraceae	Halopenitus	3	0	0	3	0	3	3
Archaea	no rank	Euryarchaeota	Halobacteria	Haloferacales	Halorubraceae	Halorubrum	80	1	1	80	6	157	157
Archaea	no rank	Euryarchaeota	Halobacteria	Haloferacales	Halorubraceae	Salinigranum	4	0	0	4	1	9	9
Archaea	no rank	Euryarchaeota	Halobacteria	Haloferacales	no rank	Halalkaliarchaeum	1	0	0	1	0	2	2
Archaea	no rank	Euryarchaeota	Halobacteria	Haloferacales	no rank	no rank	1	0	0	1	0	1	1
Archaea	no rank	Euryarchaeota	Halobacteria	Natrialbales	Natrialbaceae	Halobiforma	4	0	0	4	0	7	7
Archaea	no rank	Euryarchaeota	Halobacteria	Natrialbales	Natrialbaceae	Halopiger	6	0	0	6	0	11	11
Archaea	no rank	Euryarchaeota	Halobacteria	Natrialbales	Natrialbaceae	Halostagnicola	3	0	0	3	1	4	4
Archaea	no rank	Euryarchaeota	Halobacteria	Natrialbales	Natrialbaceae	Haloterrigena	10	0	0	10	0	13	13
Archaea	no rank	Euryarchaeota	Halobacteria	Natrialbales	Natrialbaceae	Halovivax	2	0	0	2	1	3	3
Archaea	no rank	Euryarchaeota	Halobacteria	Natrialbales	Natrialbaceae	Natrarchaeobius	3	0	0	3	0	3	3
Archaea	no rank	Euryarchaeota	Halobacteria	Natrialbales	Natrialbaceae	Natrialba	8	0	0	8	2	10	10
Archaea	no rank	Euryarchaeota	Halobacteria	Natrialbales	Natrialbaceae	Natrinema	15	0	0	15	0	18	18
Archaea	no rank	Euryarchaeota	Halobacteria	Natrialbales	Natrialbaceae	Natronobacterium	5	0	0	5	0	5	5
Archaea	no rank	Euryarchaeota	Halobacteria	Natrialbales	Natrialbaceae	Natronococcus	3	0	0	3	0	3	3
Archaea	no rank	Euryarchaeota	Halobacteria	Natrialbales	Natrialbaceae	Natronolimnobius	6	0	0	6	1	7	7
Archaea	no rank	Euryarchaeota	Halobacteria	Natrialbales	Natrialbaceae	Natronorubrum	8	0	0	8	0	8	8
Archaea	no rank	Euryarchaeota	Halobacteria	Natrialbales	Natrialbaceae	Salinarchaeum	1	0	0	1	0	1	1
Archaea	no rank	Euryarchaeota	Halobacteria	Natrialbales	Natrialbaceae	Saliphagus	1	0	0	1	0	1	1
Archaea	no rank	Euryarchaeota	Methanobacteria	Methanobacteriales	Methanobacteriaceae	Methanobacterium	4	0	0	0	4	5	5
Archaea	no rank	Euryarchaeota	Methanobacteria	Methanobacteriales	Methanobacteriaceae	Methanobrevibacter	2	0	1	0	1	3	3
Archaea	no rank	Euryarchaeota	Methanobacteria	Methanobacteriales	Methanobacteriaceae	Methanosphaera	2	0	1	1	0	2	2
Archaea	no rank	Euryarchaeota	Methanococci	Methanococcales	Methanocaldococcaceae	Methanocaldococcus	8	0	0	8	0	8	8
Archaea	no rank	Euryarchaeota	Methanococci	Methanococcales	Methanocaldococcaceae	Methanotorris	2	0	0	2	0	2	2
Archaea	no rank	Euryarchaeota	Methanococci	Methanococcales	Methanococcaceae	Methanococcus	12	0	0	12	1	13	13
Archaea	no rank	Euryarchaeota	Methanococci	Methanococcales	Methanococcaceae	Methanothermococcus	2	0	0	2	0	2	2
Archaea	no rank	Euryarchaeota	Methanococci	Methanococcales	no rank	Methanofervidicoccus	2	0	0	2	0	2	2
Archaea	no rank	Euryarchaeota	Methanomicrobia	Methanocellales	Methanocellaceae	Methanocella	4	1	1	4	0	9	9
Archaea	no rank	Euryarchaeota	Methanomicrobia	Methanomicrobiales	Methanocalculaceae	Methanocalculus	3	0	0	3	0	3	3
Archaea	no rank	Euryarchaeota	Methanomicrobia	Methanomicrobiales	Methanocorpusculaceae	Methanocorpusculum	4	0	0	4	0	4	4
Archaea	no rank	Euryarchaeota	Methanomicrobia	Methanomicrobiales	Methanomicrobiaceae	Methanoculleus	12	0	0	12	0	13	13
Archaea	no rank	Euryarchaeota	Methanomicrobia	Methanomicrobiales	Methanomicrobiaceae	Methanofollis	3	0	0	3	0	3	3
Archaea	no rank	Euryarchaeota	Methanomicrobia	Methanomicrobiales	Methanomicrobiaceae	Methanolacinia	2	0	0	2	0	2	2
Archaea	no rank	Euryarchaeota	Methanomicrobia	Methanomicrobiales	Methanomicrobiaceae	Methanomicrobium	1	0	0	1	0	1	1
Archaea	no rank	Euryarchaeota	Methanomicrobia	Methanomicrobiales	Methanomicrobiaceae	Methanoplanus	1	0	0	1	0	1	1
Archaea	no rank	Euryarchaeota	Methanomicrobia	Methanomicrobiales	Methanoregulaceae	Methanolinea	1	0	0	1	0	1	1
Archaea	no rank	Euryarchaeota	Methanomicrobia	Methanomicrobiales	Methanoregulaceae	Methanoregula	5	0	0	5	1	6	6
Archaea	no rank	Euryarchaeota	Methanomicrobia	Methanomicrobiales	Methanoregulaceae	Methanosphaerula	1	0	0	1	1	3	3
Archaea	no rank	Euryarchaeota	Methanomicrobia	Methanomicrobiales	Methanoregulaceae	no rank	6	0	0	6	0	11	11
Archaea	no rank	Euryarchaeota	Methanomicrobia	Methanomicrobiales	Methanospirillaceae	Methanospirillum	3	0	0	3	0	6	6
Archaea	no rank	Euryarchaeota	Methanomicrobia	Methanomicrobiales	no rank	no rank	6	0	1	5	0	6	6
Archaea	no rank	Euryarchaeota	Methanomicrobia	Methanophagales	no rank	no rank	7	0	1	6	3	10	10
Archaea	no rank	Euryarchaeota	Methanomicrobia	Methanosarcinales	Candidatus Methanoperedenaceae	Candidatus Methanoperedens	4	0	0	4	0	8	8
Archaea	no rank	Euryarchaeota	Methanomicrobia	Methanosarcinales	Candidatus Methanoperedenaceae	no rank	1	0	0	1	0	2	2
Archaea	no rank	Euryarchaeota	Methanomicrobia	Methanosarcinales	Methanosarcinaceae	Methanimicrococcus	1	0	0	1	0	2	2
Archaea	no rank	Euryarchaeota	Methanomicrobia	Methanosarcinales	Methanosarcinaceae	Methanococcoides	8	0	0	8	1	9	9
Archaea	no rank	Euryarchaeota	Methanomicrobia	Methanosarcinales	Methanosarcinaceae	Methanohalobium	1	0	0	1	0	1	1
Archaea	no rank	Euryarchaeota	Methanomicrobia	Methanosarcinales	Methanosarcinaceae	Methanohalophilus	16	0	0	16	0	16	16
Archaea	no rank	Euryarchaeota	Methanomicrobia	Methanosarcinales	Methanosarcinaceae	Methanolobus	7	0	0	7	0	7	7
Archaea	no rank	Euryarchaeota	Methanomicrobia	Methanosarcinales	Methanosarcinaceae	Methanomethylovorans	1	0	0	1	0	1	1
Archaea	no rank	Euryarchaeota	Methanomicrobia	Methanosarcinales	Methanosarcinaceae	Methanosalsum	2	0	0	2	0	2	2
Archaea	no rank	Euryarchaeota	Methanomicrobia	Methanosarcinales	Methanosarcinaceae	Methanosarcina	97	0	0	97	2	99	99
Archaea	no rank	Euryarchaeota	Methanomicrobia	Methanosarcinales	Methanotrichaceae	Methanothrix	3	0	1	0	2	3	3
Archaea	no rank	Euryarchaeota	Methanomicrobia	Methanosarcinales	Methermicoccaceae	Methermicoccus	1	0	0	1	0	1	1
Archaea	no rank	Euryarchaeota	Methanomicrobia	Methanosarcinales	no rank	Candidatus Argoarchaeum	1	0	0	1	0	1	1
Archaea	no rank	Euryarchaeota	Methanomicrobia	Methanosarcinales	no rank	Candidatus Syntrophoarchaeum	2	0	0	2	0	2	2
Archaea	no rank	Euryarchaeota	Methanomicrobia	Methanosarcinales	no rank	no rank	14	4	4	14	3	23	23
Archaea	no rank	Euryarchaeota	Methanonatronarchaeia	Methanonatronarchaeales	Methanonatronarchaeaceae	Candidatus Methanohalarchaeum	1	0	0	1	0	1	1
Archaea	no rank	Euryarchaeota	Methanonatronarchaeia	Methanonatronarchaeales	Methanonatronarchaeaceae	Methanonatronarchaeum	1	0	0	1	0	1	1
Archaea	no rank	Euryarchaeota	Methanonatronarchaeia	no rank	no rank	no rank	1	0	0	1	0	1	1
Archaea	no rank	Euryarchaeota	Methanopyri	Methanopyrales	Methanopyraceae	Methanopyrus	2	0	0	2	0	2	2
Archaea	no rank	Euryarchaeota	Theionarchaea	no rank	no rank	no rank	2	0	0	2	0	2	2
Archaea	no rank	Euryarchaeota	Thermococci	Thermococcales	Thermococcaceae	Palaeococcus	2	0	0	2	0	2	2
Archaea	no rank	Euryarchaeota	Thermococci	Thermococcales	Thermococcaceae	Pyrococcus	9	0	0	9	1	10	10
Archaea	no rank	Euryarchaeota	Thermococci	Thermococcales	Thermococcaceae	Thermococcus	39	0	0	39	2	41	41
Archaea	no rank	Euryarchaeota	Thermococci	Thermococcales	no rank	no rank	1	0	0	1	0	1	1
Archaea	no rank	Euryarchaeota	Thermococci	no rank	no rank	no rank	9	0	2	7	0	9	9
Archaea	no rank	Euryarchaeota	Thermoplasmata	Thermoplasmatales	no rank	no rank	4	0	1	3	0	4	4
Archaea	no rank	Euryarchaeota	Thermoplasmata	no rank	no rank	no rank	17	1	9	9	1	26	26
Archaea	no rank	Euryarchaeota	no rank	no rank	no rank	Aciduliprofundum	3	0	0	3	0	4	4
Archaea	no rank	Euryarchaeota	no rank	no rank	no rank	no rank	18	1	5	13	1	21	21
Archaea	no rank	Nanoarchaeota	no rank	no rank	no rank	no rank	1	0	0	1	0	1	1
Archaea	no rank	Thaumarchaeota	no rank	Nitrosopumilales	Nitrosopumilaceae	Nitrosarchaeum	1	0	0	1	0	1	1
Archaea	no rank	no rank	no rank	no rank	no rank	no rank	49	6	13	33	16	81	81
Bacteria	no rank	Abditibacteriota	Abditibacteria	Abditibacteriales	Abitibacteriaceae	Abditibacterium	1	1	1	1	0	22	22
Bacteria	no rank	Acidobacteria	Acidobacteriia	Acidobacteriales	Acidobacteriaceae	Acidipila	4	0	4	0	0	55	55
Bacteria	no rank	Acidobacteria	Acidobacteriia	Acidobacteriales	Acidobacteriaceae	Acidisarcina	1	0	1	0	0	15	15
Bacteria	no rank	Acidobacteria	Acidobacteriia	Acidobacteriales	Acidobacteriaceae	Acidobacterium	3	1	3	1	0	24	24
Bacteria	no rank	Acidobacteria	Acidobacteriia	Acidobacteriales	Acidobacteriaceae	Bryocella	1	0	1	0	0	16	16
Bacteria	no rank	Acidobacteria	Acidobacteriia	Acidobacteriales	Acidobacteriaceae	Candidatus Koribacter	1	1	1	1	0	13	13
Bacteria	no rank	Acidobacteria	Acidobacteriia	Acidobacteriales	Acidobacteriaceae	Candidatus Sulfotelmatobacter	2	1	2	1	0	22	22
Bacteria	no rank	Acidobacteria	Acidobacteriia	Acidobacteriales	Acidobacteriaceae	Candidatus Sulfotelmatomonas	1	0	1	0	0	18	18
Bacteria	no rank	Acidobacteria	Acidobacteriia	Acidobacteriales	Acidobacteriaceae	Edaphobacter	4	0	4	0	0	46	46
Bacteria	no rank	Acidobacteria	Acidobacteriia	Acidobacteriales	Acidobacteriaceae	Granulicella	7	0	7	0	1	117	117
Bacteria	no rank	Acidobacteria	Acidobacteriia	Acidobacteriales	Acidobacteriaceae	Occallatibacter	1	0	1	0	0	20	20
Bacteria	no rank	Acidobacteria	Acidobacteriia	Acidobacteriales	Acidobacteriaceae	Silvibacterium	1	0	1	0	0	22	22
Bacteria	no rank	Acidobacteria	Acidobacteriia	Acidobacteriales	Acidobacteriaceae	Terracidiphilus	1	0	1	0	0	20	20
Bacteria	no rank	Acidobacteria	Acidobacteriia	Acidobacteriales	Acidobacteriaceae	Terriglobus	6	0	6	0	3	133	133
Bacteria	no rank	Acidobacteria	Acidobacteriia	Acidobacteriales	Acidobacteriaceae	no rank	6	0	6	0	0	55	55
Bacteria	no rank	Acidobacteria	Acidobacteriia	Acidobacteriales	no rank	no rank	5	1	5	1	0	27	27
Bacteria	no rank	Acidobacteria	Acidobacteriia	Bryobacterales	Bryobacteraceae	Bryobacter	1	1	1	1	0	8	8
Bacteria	no rank	Acidobacteria	Acidobacteriia	Bryobacterales	Solibacteraceae	Candidatus Solibacter	1	1	1	1	0	5	5
Bacteria	no rank	Acidobacteria	Acidobacteriia	Bryobacterales	Solibacteraceae	Candidatus Sulfopaludibacter	3	2	2	3	0	15	15
Bacteria	no rank	Acidobacteria	Acidobacteriia	no rank	no rank	no rank	4	2	4	2	0	25	25
Bacteria	no rank	Acidobacteria	Blastocatellia	Blastocatellales	Pyrinomonadaceae	Pyrinomonas	1	1	1	1	0	10	10
Bacteria	no rank	Acidobacteria	Blastocatellia	no rank	no rank	Chloracidobacterium	3	3	3	3	0	21	21
Bacteria	no rank	Acidobacteria	Blastocatellia	no rank	no rank	no rank	3	3	3	3	0	27	27
Bacteria	no rank	Acidobacteria	Holophagae	Holophagales	Holophagaceae	Geothrix	1	0	1	0	0	10	10
Bacteria	no rank	Acidobacteria	Holophagae	Holophagales	Holophagaceae	Holophaga	1	0	1	0	0	18	18
Bacteria	no rank	Acidobacteria	Thermoanaerobaculia	Thermoanaerobaculales	Thermoanaerobaculaceae	Thermoanaerobaculum	1	1	1	1	0	10	10
Bacteria	no rank	Acidobacteria	Vicinamibacteria	no rank	Vicinamibacteraceae	Luteitalea	1	1	1	1	0	4	4
Bacteria	no rank	Acidobacteria	no rank	no rank	no rank	no rank	262	156	257	161	14	2714	2714
Bacteria	no rank	Actinobacteria	Acidimicrobiia	Acidimicrobiales	Acidimicrobiaceae	Acidimicrobium	6	1	6	1	0	18	18
Bacteria	no rank	Actinobacteria	Acidimicrobiia	Acidimicrobiales	Acidimicrobiaceae	Acidithrix	1	1	1	1	1	24	24
Bacteria	no rank	Actinobacteria	Acidimicrobiia	Acidimicrobiales	Acidimicrobiaceae	Ferrimicrobium	2	2	2	2	0	36	36
Bacteria	no rank	Actinobacteria	Acidimicrobiia	Acidimicrobiales	Acidimicrobiaceae	Ferrithrix	1	1	1	1	1	15	15
Bacteria	no rank	Actinobacteria	Acidimicrobiia	Acidimicrobiales	Acidimicrobiaceae	no rank	4	0	2	2	0	26	26
Bacteria	no rank	Actinobacteria	Acidimicrobiia	Acidimicrobiales	Ilumatobacteraceae	Desertimonas	1	1	1	1	0	9	9
Bacteria	no rank	Actinobacteria	Acidimicrobiia	Acidimicrobiales	Ilumatobacteraceae	Ilumatobacter	5	3	4	4	0	77	77
Bacteria	no rank	Actinobacteria	Acidimicrobiia	Acidimicrobiales	Microthrixaceae	Candidatus Microthrix	2	2	2	2	0	6	6
Bacteria	no rank	Actinobacteria	Acidimicrobiia	Acidimicrobiales	no rank	no rank	9	0	8	1	1	43	43
Bacteria	no rank	Actinobacteria	Acidimicrobiia	no rank	no rank	no rank	6	1	6	1	0	27	27
Bacteria	no rank	Actinobacteria	Actinobacteria	Acidothermales	Acidothermaceae	Acidothermus	1	1	1	1	0	17	17
Bacteria	no rank	Actinobacteria	Actinobacteria	Actinomycetales	Actinomycetaceae	Actinomyces	144	105	114	135	8	277	277
Bacteria	no rank	Actinobacteria	Actinobacteria	Actinomycetales	Actinomycetaceae	Arcanobacterium	4	0	0	0	4	4	4
Bacteria	no rank	Actinobacteria	Actinobacteria	Actinomycetales	Actinomycetaceae	Flaviflexus	1	0	1	0	0	1	1
Bacteria	no rank	Actinobacteria	Actinobacteria	Actinomycetales	Actinomycetaceae	Mobiluncus	15	0	0	15	0	15	15
Bacteria	no rank	Actinobacteria	Actinobacteria	Actinomycetales	Actinomycetaceae	Schaalia	20	0	0	20	1	21	21
Bacteria	no rank	Actinobacteria	Actinobacteria	Actinomycetales	Actinomycetaceae	Trueperella	1	0	0	1	0	1	1
Bacteria	no rank	Actinobacteria	Actinobacteria	Actinomycetales	Actinomycetaceae	Varibaculum	2	2	2	2	2	16	16
Bacteria	no rank	Actinobacteria	Actinobacteria	Actinomycetales	Actinomycetaceae	no rank	4	1	1	4	0	5	5
Bacteria	no rank	Actinobacteria	Actinobacteria	Actinomycetales	no rank	no rank	6	3	5	4	0	21	21
Bacteria	no rank	Actinobacteria	Actinobacteria	Actinopolysporales	Actinopolysporaceae	Actinopolyspora	12	0	12	0	1	292	292
Bacteria	no rank	Actinobacteria	Actinobacteria	Bifidobacteriales	Bifidobacteriaceae	Aeriscardovia	1	0	0	0	1	1	1
Bacteria	no rank	Actinobacteria	Actinobacteria	Bifidobacteriales	Bifidobacteriaceae	Alloscardovia	8	0	5	0	5	14	14
Bacteria	no rank	Actinobacteria	Actinobacteria	Bifidobacteriales	Bifidobacteriaceae	Bifidobacterium	696	0	664	0	95	1126	1123
Bacteria	no rank	Actinobacteria	Actinobacteria	Bifidobacteriales	Bifidobacteriaceae	Bombiscardovia	1	0	1	0	0	1	1
Bacteria	no rank	Actinobacteria	Actinobacteria	Bifidobacteriales	Bifidobacteriaceae	Gardnerella	21	2	2	2	19	28	28
Bacteria	no rank	Actinobacteria	Actinobacteria	Bifidobacteriales	Bifidobacteriaceae	Parascardovia	5	0	5	0	0	10	10
Bacteria	no rank	Actinobacteria	Actinobacteria	Bifidobacteriales	Bifidobacteriaceae	Pseudoscardovia	2	0	2	0	0	4	4
Bacteria	no rank	Actinobacteria	Actinobacteria	Bifidobacteriales	Bifidobacteriaceae	Scardovia	4	0	4	0	0	6	6
Bacteria	no rank	Actinobacteria	Actinobacteria	Bifidobacteriales	Bifidobacteriaceae	no rank	2	0	0	0	2	2	2
Bacteria	no rank	Actinobacteria	Actinobacteria	Bifidobacteriales	no rank	no rank	1	0	1	0	0	1	1
Bacteria	no rank	Actinobacteria	Actinobacteria	Candidatus Actinomarinales	no rank	no rank	3	0	0	3	0	3	3
Bacteria	no rank	Actinobacteria	Actinobacteria	Candidatus Nanopelagicales	Candidatus Nanopelagicaceae	Candidatus Nanopelagicus	2	0	2	0	0	2	2
Bacteria	no rank	Actinobacteria	Actinobacteria	Candidatus Nanopelagicales	Candidatus Nanopelagicaceae	Candidatus Planktophila	13	0	13	0	0	15	15
Bacteria	no rank	Actinobacteria	Actinobacteria	Catenulisporales	Actinospicaceae	Actinospica	2	2	2	2	1	44	44
Bacteria	no rank	Actinobacteria	Actinobacteria	Catenulisporales	Catenulisporaceae	Catenulispora	2	2	2	2	1	37	37
Bacteria	no rank	Actinobacteria	Actinobacteria	Corynebacteriales	Corynebacteriaceae	Corynebacterium	153	24	44	119	18	190	190
Bacteria	no rank	Actinobacteria	Actinobacteria	Corynebacteriales	Corynebacteriaceae	no rank	2	0	1	1	0	6	6
Bacteria	no rank	Actinobacteria	Actinobacteria	Corynebacteriales	Dietziaceae	Dietzia	24	18	21	21	5	72	72
Bacteria	no rank	Actinobacteria	Actinobacteria	Corynebacteriales	Gordoniaceae	Gordonia	82	77	82	77	12	640	640
Bacteria	no rank	Actinobacteria	Actinobacteria	Corynebacteriales	Gordoniaceae	Millisia	1	0	1	0	0	18	18
Bacteria	no rank	Actinobacteria	Actinobacteria	Corynebacteriales	Gordoniaceae	Skermania	2	2	2	2	0	33	33
Bacteria	no rank	Actinobacteria	Actinobacteria	Corynebacteriales	Mycobacteriaceae	Hoyosella	2	2	2	2	0	15	15
Bacteria	no rank	Actinobacteria	Actinobacteria	Corynebacteriales	Mycobacteriaceae	Mycobacterium	7279	7205	7277	7207	87	52653	52641
Bacteria	no rank	Actinobacteria	Actinobacteria	Corynebacteriales	Mycobacteriaceae	Mycobacteroides	1776	1769	1776	1769	448	18137	18135
Bacteria	no rank	Actinobacteria	Actinobacteria	Corynebacteriales	Mycobacteriaceae	Mycolicibacillus	3	3	3	3	0	17	17
Bacteria	no rank	Actinobacteria	Actinobacteria	Corynebacteriales	Mycobacteriaceae	Mycolicibacter	30	0	30	0	4	146	146
Bacteria	no rank	Actinobacteria	Actinobacteria	Corynebacteriales	Mycobacteriaceae	Mycolicibacterium	224	219	224	219	56	3210	3210
Bacteria	no rank	Actinobacteria	Actinobacteria	Corynebacteriales	Mycobacteriaceae	no rank	1	1	1	1	0	11	11
Bacteria	no rank	Actinobacteria	Actinobacteria	Corynebacteriales	Nocardiaceae	Nocardia	168	55	168	55	15	2628	2628
Bacteria	no rank	Actinobacteria	Actinobacteria	Corynebacteriales	Nocardiaceae	Rhodococcus	369	358	369	358	46	7763	7763
Bacteria	no rank	Actinobacteria	Actinobacteria	Corynebacteriales	Nocardiaceae	Smaragdicoccus	2	0	2	0	0	34	34
Bacteria	no rank	Actinobacteria	Actinobacteria	Corynebacteriales	Nocardiaceae	Williamsia	11	11	11	11	1	158	158
Bacteria	no rank	Actinobacteria	Actinobacteria	Corynebacteriales	Segniliparaceae	Segniliparus	2	0	2	0	0	5	5
Bacteria	no rank	Actinobacteria	Actinobacteria	Corynebacteriales	Tsukamurellaceae	Tsukamurella	21	21	21	21	4	378	378
Bacteria	no rank	Actinobacteria	Actinobacteria	Corynebacteriales	no rank	Lawsonella	4	0	4	0	0	4	4
Bacteria	no rank	Actinobacteria	Actinobacteria	Corynebacteriales	no rank	Tomitella	2	2	2	2	0	15	15
Bacteria	no rank	Actinobacteria	Actinobacteria	Cryptosporangiales	Cryptosporangiaceae	Cryptosporangium	3	3	3	3	0	151	151
Bacteria	no rank	Actinobacteria	Actinobacteria	Frankiales	Frankiaceae	Frankia	53	52	53	52	50	1176	1175
Bacteria	no rank	Actinobacteria	Actinobacteria	Frankiales	Frankiaceae	Jatrophihabitans	3	3	3	3	1	51	51
Bacteria	no rank	Actinobacteria	Actinobacteria	Frankiales	Motilibacteraceae	Motilibacter	2	2	2	2	0	104	104
Bacteria	no rank	Actinobacteria	Actinobacteria	Frankiales	no rank	Antricoccus	1	1	1	1	0	3	3
Bacteria	no rank	Actinobacteria	Actinobacteria	Frankiales	no rank	no rank	3	3	3	3	0	97	97
Bacteria	no rank	Actinobacteria	Actinobacteria	Geodermatophilales	Geodermatophilaceae	Blastococcus	27	27	27	27	4	967	967
Bacteria	no rank	Actinobacteria	Actinobacteria	Geodermatophilales	Geodermatophilaceae	Cumulibacter	2	0	0	1	1	2	2
Bacteria	no rank	Actinobacteria	Actinobacteria	Geodermatophilales	Geodermatophilaceae	Geodermatophilus	24	23	24	23	0	800	800
Bacteria	no rank	Actinobacteria	Actinobacteria	Geodermatophilales	Geodermatophilaceae	Klenkia	4	4	4	4	1	163	163
Bacteria	no rank	Actinobacteria	Actinobacteria	Geodermatophilales	Geodermatophilaceae	Modestobacter	9	8	9	8	0	265	265
Bacteria	no rank	Actinobacteria	Actinobacteria	Geodermatophilales	Geodermatophilaceae	no rank	3	1	3	1	0	78	78
Bacteria	no rank	Actinobacteria	Actinobacteria	Glycomycetales	Glycomycetaceae	Glycomyces	14	12	14	12	1	114	113
Bacteria	no rank	Actinobacteria	Actinobacteria	Glycomycetales	Glycomycetaceae	Haloglycomyces	1	1	1	1	0	7	7
Bacteria	no rank	Actinobacteria	Actinobacteria	Glycomycetales	Glycomycetaceae	Salilacibacter	1	1	1	1	0	3	3
Bacteria	no rank	Actinobacteria	Actinobacteria	Glycomycetales	Glycomycetaceae	Stackebrandtia	3	3	3	3	0	33	33
Bacteria	no rank	Actinobacteria	Actinobacteria	Jiangellales	Jiangellaceae	Haloactinopolyspora	2	2	2	2	2	10	10
Bacteria	no rank	Actinobacteria	Actinobacteria	Jiangellales	Jiangellaceae	Jiangella	13	13	13	13	2	128	128
Bacteria	no rank	Actinobacteria	Actinobacteria	Jiangellales	Jiangellaceae	Phytoactinopolyspora	2	2	2	2	0	24	24
Bacteria	no rank	Actinobacteria	Actinobacteria	Kineosporiales	Kineosporiaceae	Angustibacter	1	1	1	1	0	41	41
Bacteria	no rank	Actinobacteria	Actinobacteria	Kineosporiales	Kineosporiaceae	Kineococcus	3	3	3	3	0	255	255
Bacteria	no rank	Actinobacteria	Actinobacteria	Kineosporiales	Kineosporiaceae	Kineosporia	2	2	2	2	0	134	134
Bacteria	no rank	Actinobacteria	Actinobacteria	Kineosporiales	Kineosporiaceae	Pseudokineococcus	1	1	1	1	0	33	33
Bacteria	no rank	Actinobacteria	Actinobacteria	Kineosporiales	Kineosporiaceae	Quadrisphaera	4	4	4	4	0	192	192
Bacteria	no rank	Actinobacteria	Actinobacteria	Micrococcales	Beutenbergiaceae	Beutenbergia	1	1	1	1	0	2	2
Bacteria	no rank	Actinobacteria	Actinobacteria	Micrococcales	Beutenbergiaceae	Miniimonas	3	3	3	3	2	8	8
Bacteria	no rank	Actinobacteria	Actinobacteria	Micrococcales	Beutenbergiaceae	Salana	1	1	1	1	0	2	2
Bacteria	no rank	Actinobacteria	Actinobacteria	Micrococcales	Beutenbergiaceae	Serinibacter	2	2	2	2	0	4	4
Bacteria	no rank	Actinobacteria	Actinobacteria	Micrococcales	Bogoriellaceae	Bogoriella	1	0	1	0	1	3	3
Bacteria	no rank	Actinobacteria	Actinobacteria	Micrococcales	Bogoriellaceae	Georgenia	11	10	11	10	2	36	36
Bacteria	no rank	Actinobacteria	Actinobacteria	Micrococcales	Brevibacteriaceae	Brevibacterium	75	3	75	3	12	243	243
Bacteria	no rank	Actinobacteria	Actinobacteria	Micrococcales	Cellulomonadaceae	Actinotalea	2	2	2	2	1	47	47
Bacteria	no rank	Actinobacteria	Actinobacteria	Micrococcales	Cellulomonadaceae	Cellulomonas	58	55	57	56	3	780	780
Bacteria	no rank	Actinobacteria	Actinobacteria	Micrococcales	Cellulomonadaceae	Oerskovia	8	8	8	8	1	17	17
Bacteria	no rank	Actinobacteria	Actinobacteria	Micrococcales	Cellulomonadaceae	Paraoerskovia	2	2	2	2	0	4	4
Bacteria	no rank	Actinobacteria	Actinobacteria	Micrococcales	Cellulomonadaceae	Sediminihabitans	1	1	1	1	0	4	4
Bacteria	no rank	Actinobacteria	Actinobacteria	Micrococcales	Cellulomonadaceae	no rank	1	0	1	0	0	1	1
Bacteria	no rank	Actinobacteria	Actinobacteria	Micrococcales	Demequinaceae	Demequina	15	0	15	0	2	171	171
Bacteria	no rank	Actinobacteria	Actinobacteria	Micrococcales	Demequinaceae	Lysinimicrobium	15	0	15	0	0	120	120
Bacteria	no rank	Actinobacteria	Actinobacteria	Micrococcales	Dermabacteraceae	Brachybacterium	3	0	1	0	2	3	3
Bacteria	no rank	Actinobacteria	Actinobacteria	Micrococcales	Dermacoccaceae	Barrientosiimonas	1	1	1	1	0	2	2
Bacteria	no rank	Actinobacteria	Actinobacteria	Micrococcales	Dermacoccaceae	Branchiibius	3	3	3	3	0	7	7
Bacteria	no rank	Actinobacteria	Actinobacteria	Micrococcales	Dermacoccaceae	Calidifontibacter	1	1	1	1	0	4	4
Bacteria	no rank	Actinobacteria	Actinobacteria	Micrococcales	Dermacoccaceae	Demetria	1	1	1	1	0	4	4
Bacteria	no rank	Actinobacteria	Actinobacteria	Micrococcales	Dermacoccaceae	Dermacoccus	15	14	15	14	6	35	35
Bacteria	no rank	Actinobacteria	Actinobacteria	Micrococcales	Dermacoccaceae	Flexivirga	1	1	1	1	0	7	7
Bacteria	no rank	Actinobacteria	Actinobacteria	Micrococcales	Dermacoccaceae	Kytococcus	8	6	6	8	2	18	18
Bacteria	no rank	Actinobacteria	Actinobacteria	Micrococcales	Dermacoccaceae	Luteipulveratus	2	2	2	2	0	7	7
Bacteria	no rank	Actinobacteria	Actinobacteria	Micrococcales	Dermacoccaceae	Rudaeicoccus	1	0	1	0	0	1	1
Bacteria	no rank	Actinobacteria	Actinobacteria	Micrococcales	Dermacoccaceae	Yimella	2	2	2	2	1	7	7
Bacteria	no rank	Actinobacteria	Actinobacteria	Micrococcales	Dermacoccaceae	no rank	1	1	1	1	0	6	6
Bacteria	no rank	Actinobacteria	Actinobacteria	Micrococcales	Dermatophilaceae	Austwickia	3	3	3	3	0	6	6
Bacteria	no rank	Actinobacteria	Actinobacteria	Micrococcales	Dermatophilaceae	Dermatophilus	3	3	3	3	0	21	21
Bacteria	no rank	Actinobacteria	Actinobacteria	Micrococcales	Dermatophilaceae	Kineosphaera	1	1	1	1	0	3	3
Bacteria	no rank	Actinobacteria	Actinobacteria	Micrococcales	Dermatophilaceae	Mobilicoccus	3	3	3	3	0	21	21
Bacteria	no rank	Actinobacteria	Actinobacteria	Micrococcales	Dermatophilaceae	Piscicoccus	1	1	1	1	1	6	6
Bacteria	no rank	Actinobacteria	Actinobacteria	Micrococcales	Intrasporangiaceae	Arsenicicoccus	3	3	3	3	0	31	31
Bacteria	no rank	Actinobacteria	Actinobacteria	Micrococcales	Intrasporangiaceae	Humibacillus	3	3	3	3	1	16	16
Bacteria	no rank	Actinobacteria	Actinobacteria	Micrococcales	Intrasporangiaceae	Intrasporangium	4	4	4	4	1	26	26
Bacteria	no rank	Actinobacteria	Actinobacteria	Micrococcales	Intrasporangiaceae	Janibacter	13	12	12	13	1	47	47
Bacteria	no rank	Actinobacteria	Actinobacteria	Micrococcales	Intrasporangiaceae	Knoellia	6	6	6	6	1	25	25
Bacteria	no rank	Actinobacteria	Actinobacteria	Micrococcales	Intrasporangiaceae	Kribbia	1	1	1	1	0	3	3
Bacteria	no rank	Actinobacteria	Actinobacteria	Micrococcales	Intrasporangiaceae	Lapillicoccus	1	1	1	1	0	15	15
Bacteria	no rank	Actinobacteria	Actinobacteria	Micrococcales	Intrasporangiaceae	Marihabitans	1	1	1	1	0	2	2
Bacteria	no rank	Actinobacteria	Actinobacteria	Micrococcales	Intrasporangiaceae	Ornithinicoccus	4	4	4	4	1	19	19
Bacteria	no rank	Actinobacteria	Actinobacteria	Micrococcales	Intrasporangiaceae	Ornithinimicrobium	13	11	13	11	1	46	46
Bacteria	no rank	Actinobacteria	Actinobacteria	Micrococcales	Intrasporangiaceae	Oryzihumus	1	1	1	1	0	8	8
Bacteria	no rank	Actinobacteria	Actinobacteria	Micrococcales	Intrasporangiaceae	Phycicoccus	11	11	11	11	2	60	60
Bacteria	no rank	Actinobacteria	Actinobacteria	Micrococcales	Intrasporangiaceae	Serinicoccus	10	10	10	10	1	22	22
Bacteria	no rank	Actinobacteria	Actinobacteria	Micrococcales	Intrasporangiaceae	Terrabacter	9	9	9	9	0	41	41
Bacteria	no rank	Actinobacteria	Actinobacteria	Micrococcales	Intrasporangiaceae	Terracoccus	2	2	2	2	0	6	6
Bacteria	no rank	Actinobacteria	Actinobacteria	Micrococcales	Intrasporangiaceae	Tetrasphaera	7	5	5	7	3	40	40
Bacteria	no rank	Actinobacteria	Actinobacteria	Micrococcales	Intrasporangiaceae	no rank	1	1	1	1	0	5	5
Bacteria	no rank	Actinobacteria	Actinobacteria	Micrococcales	Jonesiaceae	Jonesia	4	4	4	4	0	8	8
Bacteria	no rank	Actinobacteria	Actinobacteria	Micrococcales	Jonesiaceae	no rank	1	1	1	1	0	3	3
Bacteria	no rank	Actinobacteria	Actinobacteria	Micrococcales	Microbacteriaceae	Agreia	8	0	8	0	0	35	35
Bacteria	no rank	Actinobacteria	Actinobacteria	Micrococcales	Microbacteriaceae	Agrococcus	13	0	13	0	1	24	24
Bacteria	no rank	Actinobacteria	Actinobacteria	Micrococcales	Microbacteriaceae	Agromyces	28	0	28	0	1	79	79
Bacteria	no rank	Actinobacteria	Actinobacteria	Micrococcales	Microbacteriaceae	Amnibacterium	3	0	3	0	0	5	5
Bacteria	no rank	Actinobacteria	Actinobacteria	Micrococcales	Microbacteriaceae	Aurantimicrobium	3	0	3	0	0	3	3
Bacteria	no rank	Actinobacteria	Actinobacteria	Micrococcales	Microbacteriaceae	Candidatus Aquiluna	3	0	3	0	0	12	12
Bacteria	no rank	Actinobacteria	Actinobacteria	Micrococcales	Microbacteriaceae	Candidatus Lumbricidophila	1	0	1	0	1	2	2
Bacteria	no rank	Actinobacteria	Actinobacteria	Micrococcales	Microbacteriaceae	Clavibacter	51	0	51	0	4	78	78
Bacteria	no rank	Actinobacteria	Actinobacteria	Micrococcales	Microbacteriaceae	Cnuibacter	1	0	1	0	0	6	6
Bacteria	no rank	Actinobacteria	Actinobacteria	Micrococcales	Microbacteriaceae	Compostimonas	1	0	1	0	0	5	5
Bacteria	no rank	Actinobacteria	Actinobacteria	Micrococcales	Microbacteriaceae	Cryobacterium	105	0	105	0	7	1140	1140
Bacteria	no rank	Actinobacteria	Actinobacteria	Micrococcales	Microbacteriaceae	Cryocola	1	0	1	0	0	5	5
Bacteria	no rank	Actinobacteria	Actinobacteria	Micrococcales	Microbacteriaceae	Curtobacterium	125	1	125	1	13	192	192
Bacteria	no rank	Actinobacteria	Actinobacteria	Micrococcales	Microbacteriaceae	Diaminobutyricimonas	1	0	1	0	0	2	2
Bacteria	no rank	Actinobacteria	Actinobacteria	Micrococcales	Microbacteriaceae	Frigoribacterium	19	0	19	0	2	22	22
Bacteria	no rank	Actinobacteria	Actinobacteria	Micrococcales	Microbacteriaceae	Frondihabitans	7	0	7	0	0	7	7
Bacteria	no rank	Actinobacteria	Actinobacteria	Micrococcales	Microbacteriaceae	Glaciibacter	2	0	2	0	0	5	5
Bacteria	no rank	Actinobacteria	Actinobacteria	Micrococcales	Microbacteriaceae	Glaciihabitans	3	0	3	0	0	11	11
Bacteria	no rank	Actinobacteria	Actinobacteria	Micrococcales	Microbacteriaceae	Gryllotalpicola	2	0	2	0	0	2	2
Bacteria	no rank	Actinobacteria	Actinobacteria	Micrococcales	Microbacteriaceae	Gulosibacter	4	0	4	0	0	7	7
Bacteria	no rank	Actinobacteria	Actinobacteria	Micrococcales	Microbacteriaceae	Herbiconiux	4	0	4	0	0	17	17
Bacteria	no rank	Actinobacteria	Actinobacteria	Micrococcales	Microbacteriaceae	Homoserinibacter	1	0	1	0	0	3	3
Bacteria	no rank	Actinobacteria	Actinobacteria	Micrococcales	Microbacteriaceae	Homoserinimonas	2	0	2	0	0	7	7
Bacteria	no rank	Actinobacteria	Actinobacteria	Micrococcales	Microbacteriaceae	Humibacter	3	0	3	0	0	6	6
Bacteria	no rank	Actinobacteria	Actinobacteria	Micrococcales	Microbacteriaceae	Klugiella	1	0	1	0	0	2	2
Bacteria	no rank	Actinobacteria	Actinobacteria	Micrococcales	Microbacteriaceae	Labedella	5	0	5	0	0	21	21
Bacteria	no rank	Actinobacteria	Actinobacteria	Micrococcales	Microbacteriaceae	Leifsonia	37	1	36	2	3	141	141
Bacteria	no rank	Actinobacteria	Actinobacteria	Micrococcales	Microbacteriaceae	Leucobacter	36	0	36	0	2	211	211
Bacteria	no rank	Actinobacteria	Actinobacteria	Micrococcales	Microbacteriaceae	Microbacterium	272	1	271	1	64	706	706
Bacteria	no rank	Actinobacteria	Actinobacteria	Micrococcales	Microbacteriaceae	Microcella	5	0	5	0	1	9	9
Bacteria	no rank	Actinobacteria	Actinobacteria	Micrococcales	Microbacteriaceae	Microterricola	5	0	5	0	0	23	23
Bacteria	no rank	Actinobacteria	Actinobacteria	Micrococcales	Microbacteriaceae	Mycetocola	11	0	11	0	0	35	35
Bacteria	no rank	Actinobacteria	Actinobacteria	Micrococcales	Microbacteriaceae	Naasia	1	0	1	0	0	1	1
Bacteria	no rank	Actinobacteria	Actinobacteria	Micrococcales	Microbacteriaceae	Okibacterium	1	0	1	0	0	2	2
Bacteria	no rank	Actinobacteria	Actinobacteria	Micrococcales	Microbacteriaceae	Plantibacter	14	0	14	0	5	55	55
Bacteria	no rank	Actinobacteria	Actinobacteria	Micrococcales	Microbacteriaceae	Pontimonas	1	0	1	0	0	1	1
Bacteria	no rank	Actinobacteria	Actinobacteria	Micrococcales	Microbacteriaceae	Protaetiibacter	1	0	1	0	0	1	1
Bacteria	no rank	Actinobacteria	Actinobacteria	Micrococcales	Microbacteriaceae	Pseudoclavibacter	18	0	18	0	5	40	40
Bacteria	no rank	Actinobacteria	Actinobacteria	Micrococcales	Microbacteriaceae	Rathayibacter	133	0	133	0	4	290	290
Bacteria	no rank	Actinobacteria	Actinobacteria	Micrococcales	Microbacteriaceae	Rhodoglobus	1	0	1	0	0	1	1
Bacteria	no rank	Actinobacteria	Actinobacteria	Micrococcales	Microbacteriaceae	Rhodoluna	5	0	5	0	0	9	9
Bacteria	no rank	Actinobacteria	Actinobacteria	Micrococcales	Microbacteriaceae	Salinibacterium	10	0	10	0	1	37	37
Bacteria	no rank	Actinobacteria	Actinobacteria	Micrococcales	Microbacteriaceae	Schumannella	2	0	2	0	0	2	2
Bacteria	no rank	Actinobacteria	Actinobacteria	Micrococcales	Microbacteriaceae	Subtercola	9	0	9	0	0	47	47
Bacteria	no rank	Actinobacteria	Actinobacteria	Micrococcales	Microbacteriaceae	Yonghaparkia	2	0	2	0	0	4	4
Bacteria	no rank	Actinobacteria	Actinobacteria	Micrococcales	Microbacteriaceae	no rank	12	0	11	1	3	75	75
Bacteria	no rank	Actinobacteria	Actinobacteria	Micrococcales	Micrococcaceae	Acaricomes	1	1	1	1	0	3	3
Bacteria	no rank	Actinobacteria	Actinobacteria	Micrococcales	Micrococcaceae	Arthrobacter	198	195	197	196	19	1631	1631
Bacteria	no rank	Actinobacteria	Actinobacteria	Micrococcales	Micrococcaceae	Auritidibacter	6	0	6	0	0	11	11
Bacteria	no rank	Actinobacteria	Actinobacteria	Micrococcales	Micrococcaceae	Citricoccus	5	1	5	1	0	13	13
Bacteria	no rank	Actinobacteria	Actinobacteria	Micrococcales	Micrococcaceae	Enteractinococcus	2	0	2	0	0	2	2
Bacteria	no rank	Actinobacteria	Actinobacteria	Micrococcales	Micrococcaceae	Glutamicibacter	19	18	19	18	2	87	87
Bacteria	no rank	Actinobacteria	Actinobacteria	Micrococcales	Micrococcaceae	Haematomicrobium	1	1	1	1	0	3	3
Bacteria	no rank	Actinobacteria	Actinobacteria	Micrococcales	Micrococcaceae	Kocuria	85	66	76	75	8	162	162
Bacteria	no rank	Actinobacteria	Actinobacteria	Micrococcales	Micrococcaceae	Micrococcus	85	1	85	1	22	120	119
Bacteria	no rank	Actinobacteria	Actinobacteria	Micrococcales	Micrococcaceae	Neomicrococcus	1	0	1	0	0	2	2
Bacteria	no rank	Actinobacteria	Actinobacteria	Micrococcales	Micrococcaceae	Nesterenkonia	15	0	15	0	1	29	29
Bacteria	no rank	Actinobacteria	Actinobacteria	Micrococcales	Micrococcaceae	Paenarthrobacter	9	9	9	9	0	92	92
Bacteria	no rank	Actinobacteria	Actinobacteria	Micrococcales	Micrococcaceae	Paeniglutamicibacter	3	3	3	3	0	11	11
Bacteria	no rank	Actinobacteria	Actinobacteria	Micrococcales	Micrococcaceae	Pseudarthrobacter	19	19	19	19	1	155	155
Bacteria	no rank	Actinobacteria	Actinobacteria	Micrococcales	Micrococcaceae	Pseudoglutamicibacter	3	3	3	3	0	6	6
Bacteria	no rank	Actinobacteria	Actinobacteria	Micrococcales	Micrococcaceae	Psychromicrobium	1	1	1	1	0	4	4
Bacteria	no rank	Actinobacteria	Actinobacteria	Micrococcales	Micrococcaceae	Renibacterium	3	3	3	3	0	12	12
Bacteria	no rank	Actinobacteria	Actinobacteria	Micrococcales	Micrococcaceae	Rothia	97	1	1	97	6	105	105
Bacteria	no rank	Actinobacteria	Actinobacteria	Micrococcales	Micrococcaceae	Sinomonas	8	8	8	8	2	62	62
Bacteria	no rank	Actinobacteria	Actinobacteria	Micrococcales	Micrococcaceae	Tersicoccus	2	2	2	2	1	12	12
Bacteria	no rank	Actinobacteria	Actinobacteria	Micrococcales	Micrococcaceae	Yaniella	1	0	1	0	0	1	1
Bacteria	no rank	Actinobacteria	Actinobacteria	Micrococcales	Micrococcaceae	Zhihengliuella	3	2	3	2	1	14	14
Bacteria	no rank	Actinobacteria	Actinobacteria	Micrococcales	Micrococcaceae	no rank	2	1	2	1	0	9	9
Bacteria	no rank	Actinobacteria	Actinobacteria	Micrococcales	Promicromonosporaceae	Cellulosimicrobium	23	20	23	20	1	49	49
Bacteria	no rank	Actinobacteria	Actinobacteria	Micrococcales	Promicromonosporaceae	Isoptericola	9	8	8	9	1	38	38
Bacteria	no rank	Actinobacteria	Actinobacteria	Micrococcales	Promicromonosporaceae	Krasilnikoviella	1	1	1	1	0	3	3
Bacteria	no rank	Actinobacteria	Actinobacteria	Micrococcales	Promicromonosporaceae	Myceligenerans	1	1	1	1	1	5	5
Bacteria	no rank	Actinobacteria	Actinobacteria	Micrococcales	Promicromonosporaceae	Promicromonospora	9	9	9	9	0	21	21
Bacteria	no rank	Actinobacteria	Actinobacteria	Micrococcales	Promicromonosporaceae	Xylanibacterium	2	2	2	2	0	4	4
Bacteria	no rank	Actinobacteria	Actinobacteria	Micrococcales	Promicromonosporaceae	Xylanimicrobium	1	1	1	1	0	2	2
Bacteria	no rank	Actinobacteria	Actinobacteria	Micrococcales	Promicromonosporaceae	Xylanimonas	2	1	1	2	0	3	3
Bacteria	no rank	Actinobacteria	Actinobacteria	Micrococcales	Promicromonosporaceae	no rank	2	1	1	2	0	4	4
Bacteria	no rank	Actinobacteria	Actinobacteria	Micrococcales	Rarobacteraceae	Rarobacter	2	2	2	2	0	6	6
Bacteria	no rank	Actinobacteria	Actinobacteria	Micrococcales	Ruaniaceae	Haloactinobacterium	2	2	2	2	0	5	5
Bacteria	no rank	Actinobacteria	Actinobacteria	Micrococcales	Ruaniaceae	Ruania	3	3	3	3	0	6	6
Bacteria	no rank	Actinobacteria	Actinobacteria	Micrococcales	Ruaniaceae	no rank	1	1	1	1	0	2	2
Bacteria	no rank	Actinobacteria	Actinobacteria	Micrococcales	Sanguibacteraceae	Sanguibacter	9	8	8	9	1	36	36
Bacteria	no rank	Actinobacteria	Actinobacteria	Micrococcales	no rank	Luteimicrobium	1	1	1	1	1	4	4
Bacteria	no rank	Actinobacteria	Actinobacteria	Micrococcales	no rank	Timonella	1	1	1	1	0	3	3
Bacteria	no rank	Actinobacteria	Actinobacteria	Micrococcales	no rank	no rank	7	2	7	2	1	46	46
Bacteria	no rank	Actinobacteria	Actinobacteria	Micromonosporales	Micromonosporaceae	Actinocatenispora	1	1	1	1	0	16	16
Bacteria	no rank	Actinobacteria	Actinobacteria	Micromonosporales	Micromonosporaceae	Actinoplanes	26	25	26	25	2	2080	2080
Bacteria	no rank	Actinobacteria	Actinobacteria	Micromonosporales	Micromonosporaceae	Asanoa	3	3	3	3	0	91	91
Bacteria	no rank	Actinobacteria	Actinobacteria	Micromonosporales	Micromonosporaceae	Catellatospora	2	2	2	2	1	85	85
Bacteria	no rank	Actinobacteria	Actinobacteria	Micromonosporales	Micromonosporaceae	Catelliglobosispora	1	1	1	1	0	20	20
Bacteria	no rank	Actinobacteria	Actinobacteria	Micromonosporales	Micromonosporaceae	Catenuloplanes	1	1	1	1	0	78	78
Bacteria	no rank	Actinobacteria	Actinobacteria	Micromonosporales	Micromonosporaceae	Couchioplanes	2	2	2	2	0	162	160
Bacteria	no rank	Actinobacteria	Actinobacteria	Micromonosporales	Micromonosporaceae	Dactylosporangium	1	0	1	0	0	51	51
Bacteria	no rank	Actinobacteria	Actinobacteria	Micromonosporales	Micromonosporaceae	Hamadaea	1	1	1	1	0	29	29
Bacteria	no rank	Actinobacteria	Actinobacteria	Micromonosporales	Micromonosporaceae	Jishengella	3	3	3	3	1	57	57
Bacteria	no rank	Actinobacteria	Actinobacteria	Micromonosporales	Micromonosporaceae	Krasilnikovia	1	1	1	1	0	82	82
Bacteria	no rank	Actinobacteria	Actinobacteria	Micromonosporales	Micromonosporaceae	Longispora	1	1	1	1	0	20	20
Bacteria	no rank	Actinobacteria	Actinobacteria	Micromonosporales	Micromonosporaceae	Micromonospora	149	146	148	146	20	2896	2893
Bacteria	no rank	Actinobacteria	Actinobacteria	Micromonosporales	Micromonosporaceae	Pilimelia	1	0	1	0	0	16	16
Bacteria	no rank	Actinobacteria	Actinobacteria	Micromonosporales	Micromonosporaceae	Plantactinospora	5	5	5	5	3	103	103
Bacteria	no rank	Actinobacteria	Actinobacteria	Micromonosporales	Micromonosporaceae	Pseudosporangium	1	1	1	1	0	70	70
Bacteria	no rank	Actinobacteria	Actinobacteria	Micromonosporales	Micromonosporaceae	Salinispora	94	94	94	94	5	1632	1632
Bacteria	no rank	Actinobacteria	Actinobacteria	Micromonosporales	Micromonosporaceae	Verrucosispora	8	8	8	8	0	160	160
Bacteria	no rank	Actinobacteria	Actinobacteria	Micromonosporales	Micromonosporaceae	Xiangella	2	2	2	2	0	36	36
Bacteria	no rank	Actinobacteria	Actinobacteria	Micromonosporales	Micromonosporaceae	no rank	2	2	2	2	0	41	41
Bacteria	no rank	Actinobacteria	Actinobacteria	Nakamurellales	Nakamurellaceae	Nakamurella	7	7	7	7	0	134	134
Bacteria	no rank	Actinobacteria	Actinobacteria	Propionibacteriales	Nocardioidaceae	Actinopolymorpha	3	3	3	3	0	17	17
Bacteria	no rank	Actinobacteria	Actinobacteria	Propionibacteriales	Nocardioidaceae	Aeromicrobium	25	21	22	24	0	175	175
Bacteria	no rank	Actinobacteria	Actinobacteria	Propionibacteriales	Nocardioidaceae	Friedmanniella	3	3	3	3	1	18	18
Bacteria	no rank	Actinobacteria	Actinobacteria	Propionibacteriales	Nocardioidaceae	Kribbella	30	30	30	30	0	380	379
Bacteria	no rank	Actinobacteria	Actinobacteria	Propionibacteriales	Nocardioidaceae	Marmoricola	10	9	10	9	3	88	88
Bacteria	no rank	Actinobacteria	Actinobacteria	Propionibacteriales	Nocardioidaceae	Micropruina	1	1	1	1	0	2	2
Bacteria	no rank	Actinobacteria	Actinobacteria	Propionibacteriales	Nocardioidaceae	Mumia	2	2	2	2	0	18	14
Bacteria	no rank	Actinobacteria	Actinobacteria	Propionibacteriales	Nocardioidaceae	Nocardioides	98	95	97	96	14	810	808
Bacteria	no rank	Actinobacteria	Actinobacteria	Propionibacteriales	Nocardioidaceae	Pimelobacter	4	3	3	4	0	64	64
Bacteria	no rank	Actinobacteria	Actinobacteria	Propionibacteriales	Nocardioidaceae	Propionicicella	1	1	1	1	1	4	4
Bacteria	no rank	Actinobacteria	Actinobacteria	Propionibacteriales	Nocardioidaceae	Propionicimonas	1	0	1	0	0	1	1
Bacteria	no rank	Actinobacteria	Actinobacteria	Propionibacteriales	Nocardioidaceae	Thermasporomyces	1	1	1	1	0	4	4
Bacteria	no rank	Actinobacteria	Actinobacteria	Propionibacteriales	Nocardioidaceae	no rank	1	1	1	1	0	12	6
Bacteria	no rank	Actinobacteria	Actinobacteria	Propionibacteriales	Propionibacteriaceae	Acidipropionibacterium	16	16	16	16	2	34	34
Bacteria	no rank	Actinobacteria	Actinobacteria	Propionibacteriales	Propionibacteriaceae	Aestuariimicrobium	1	1	1	1	0	2	2
Bacteria	no rank	Actinobacteria	Actinobacteria	Propionibacteriales	Propionibacteriaceae	Auraticoccus	1	1	1	1	1	4	4
Bacteria	no rank	Actinobacteria	Actinobacteria	Propionibacteriales	Propionibacteriaceae	Cutibacterium	302	291	295	298	1	594	594
Bacteria	no rank	Actinobacteria	Actinobacteria	Propionibacteriales	Propionibacteriaceae	Desertihabitans	2	2	2	2	0	4	4
Bacteria	no rank	Actinobacteria	Actinobacteria	Propionibacteriales	Propionibacteriaceae	Granulicoccus	2	2	2	2	0	6	6
Bacteria	no rank	Actinobacteria	Actinobacteria	Propionibacteriales	Propionibacteriaceae	Luteococcus	2	2	2	2	1	5	5
Bacteria	no rank	Actinobacteria	Actinobacteria	Propionibacteriales	Propionibacteriaceae	Microlunatus	3	3	3	3	0	10	10
Bacteria	no rank	Actinobacteria	Actinobacteria	Propionibacteriales	Propionibacteriaceae	Naumannella	1	1	1	1	0	2	2
Bacteria	no rank	Actinobacteria	Actinobacteria	Propionibacteriales	Propionibacteriaceae	Nigerium	2	0	2	0	0	2	2
Bacteria	no rank	Actinobacteria	Actinobacteria	Propionibacteriales	Propionibacteriaceae	Ponticoccus	1	1	1	1	0	6	6
Bacteria	no rank	Actinobacteria	Actinobacteria	Propionibacteriales	Propionibacteriaceae	Propionibacterium	51	42	50	43	9	103	103
Bacteria	no rank	Actinobacteria	Actinobacteria	Propionibacteriales	Propionibacteriaceae	Propioniciclava	3	1	3	1	0	4	4
Bacteria	no rank	Actinobacteria	Actinobacteria	Propionibacteriales	Propionibacteriaceae	Propioniferax	1	1	1	1	0	2	2
Bacteria	no rank	Actinobacteria	Actinobacteria	Propionibacteriales	Propionibacteriaceae	Propionimicrobium	4	4	4	4	1	9	9
Bacteria	no rank	Actinobacteria	Actinobacteria	Propionibacteriales	Propionibacteriaceae	Pseudopropionibacterium	9	9	9	9	4	22	22
Bacteria	no rank	Actinobacteria	Actinobacteria	Propionibacteriales	Propionibacteriaceae	Raineyella	1	1	1	1	0	4	4
Bacteria	no rank	Actinobacteria	Actinobacteria	Propionibacteriales	Propionibacteriaceae	Tessaracoccus	15	15	15	15	4	35	35
Bacteria	no rank	Actinobacteria	Actinobacteria	Propionibacteriales	Propionibacteriaceae	no rank	13	12	13	12	2	67	67
Bacteria	no rank	Actinobacteria	Actinobacteria	Propionibacteriales	no rank	no rank	1	0	1	0	0	1	1
Bacteria	no rank	Actinobacteria	Actinobacteria	Pseudonocardiales	Pseudonocardiaceae	Actinoalloteichus	8	0	8	0	0	104	104
Bacteria	no rank	Actinobacteria	Actinobacteria	Pseudonocardiales	Pseudonocardiaceae	Actinocrispum	1	0	1	0	0	41	41
Bacteria	no rank	Actinobacteria	Actinobacteria	Pseudonocardiales	Pseudonocardiaceae	Actinokineospora	8	1	8	1	0	135	135
Bacteria	no rank	Actinobacteria	Actinobacteria	Pseudonocardiales	Pseudonocardiaceae	Actinomycetospora	3	0	3	0	0	45	45
Bacteria	no rank	Actinobacteria	Actinobacteria	Pseudonocardiales	Pseudonocardiaceae	Actinophytocola	4	1	4	1	0	93	92
Bacteria	no rank	Actinobacteria	Actinobacteria	Pseudonocardiales	Pseudonocardiaceae	Actinosynnema	4	3	4	3	0	116	116
Bacteria	no rank	Actinobacteria	Actinobacteria	Pseudonocardiales	Pseudonocardiaceae	Alloactinosynnema	5	0	5	0	1	106	106
Bacteria	no rank	Actinobacteria	Actinobacteria	Pseudonocardiales	Pseudonocardiaceae	Allokutzneria	3	3	3	3	0	86	86
Bacteria	no rank	Actinobacteria	Actinobacteria	Pseudonocardiales	Pseudonocardiaceae	Amycolatopsis	91	2	91	2	24	2367	2367
Bacteria	no rank	Actinobacteria	Actinobacteria	Pseudonocardiales	Pseudonocardiaceae	Crossiella	1	1	1	1	0	32	32
Bacteria	no rank	Actinobacteria	Actinobacteria	Pseudonocardiales	Pseudonocardiaceae	Gandjariella	1	0	1	0	0	31	31
Bacteria	no rank	Actinobacteria	Actinobacteria	Pseudonocardiales	Pseudonocardiaceae	Haloechinothrix	1	0	1	0	0	16	16
Bacteria	no rank	Actinobacteria	Actinobacteria	Pseudonocardiales	Pseudonocardiaceae	Herbihabitans	1	0	1	0	0	18	18
Bacteria	no rank	Actinobacteria	Actinobacteria	Pseudonocardiales	Pseudonocardiaceae	Kibdelosporangium	4	1	4	1	1	158	158
Bacteria	no rank	Actinobacteria	Actinobacteria	Pseudonocardiales	Pseudonocardiaceae	Kutzneria	3	0	3	0	1	119	119
Bacteria	no rank	Actinobacteria	Actinobacteria	Pseudonocardiales	Pseudonocardiaceae	Labedaea	1	0	1	0	1	22	22
Bacteria	no rank	Actinobacteria	Actinobacteria	Pseudonocardiales	Pseudonocardiaceae	Lechevalieria	7	0	7	0	3	228	228
Bacteria	no rank	Actinobacteria	Actinobacteria	Pseudonocardiales	Pseudonocardiaceae	Lentzea	12	0	12	0	2	396	396
Bacteria	no rank	Actinobacteria	Actinobacteria	Pseudonocardiales	Pseudonocardiaceae	Prauserella	11	0	11	0	0	226	226
Bacteria	no rank	Actinobacteria	Actinobacteria	Pseudonocardiales	Pseudonocardiaceae	Pseudonocardia	51	0	51	0	6	860	860
Bacteria	no rank	Actinobacteria	Actinobacteria	Pseudonocardiales	Pseudonocardiaceae	Saccharomonospora	18	0	18	0	1	178	178
Bacteria	no rank	Actinobacteria	Actinobacteria	Pseudonocardiales	Pseudonocardiaceae	Saccharopolyspora	21	12	21	12	2	620	620
Bacteria	no rank	Actinobacteria	Actinobacteria	Pseudonocardiales	Pseudonocardiaceae	Saccharothrix	13	2	13	2	4	395	395
Bacteria	no rank	Actinobacteria	Actinobacteria	Pseudonocardiales	Pseudonocardiaceae	Sciscionella	2	0	2	0	0	53	53
Bacteria	no rank	Actinobacteria	Actinobacteria	Pseudonocardiales	Pseudonocardiaceae	Streptoalloteichus	1	1	1	1	0	21	21
Bacteria	no rank	Actinobacteria	Actinobacteria	Pseudonocardiales	Pseudonocardiaceae	Tamaricihabitans	1	0	1	0	0	20	20
Bacteria	no rank	Actinobacteria	Actinobacteria	Pseudonocardiales	Pseudonocardiaceae	Thermocrispum	3	0	3	0	0	41	41
Bacteria	no rank	Actinobacteria	Actinobacteria	Pseudonocardiales	Pseudonocardiaceae	Umezawaea	1	0	1	0	0	35	35
Bacteria	no rank	Actinobacteria	Actinobacteria	Pseudonocardiales	Pseudonocardiaceae	Yuhushiella	2	0	2	0	0	44	44
Bacteria	no rank	Actinobacteria	Actinobacteria	Pseudonocardiales	Pseudonocardiaceae	no rank	2	1	2	1	1	43	43
Bacteria	no rank	Actinobacteria	Actinobacteria	Pseudonocardiales	no rank	no rank	7	4	7	4	0	81	81
Bacteria	no rank	Actinobacteria	Actinobacteria	Sporichthyales	Sporichthyaceae	Sporichthya	1	1	1	1	0	12	12
Bacteria	no rank	Actinobacteria	Actinobacteria	Streptomycetales	Streptomycetaceae	Kitasatospora	33	33	33	33	2	507	507
Bacteria	no rank	Actinobacteria	Actinobacteria	Streptomycetales	Streptomycetaceae	Streptacidiphilus	13	13	13	13	0	205	205
Bacteria	no rank	Actinobacteria	Actinobacteria	Streptomycetales	Streptomycetaceae	Streptomyces	1485	1450	1475	1458	154	20008	20004
Bacteria	no rank	Actinobacteria	Actinobacteria	Streptomycetales	Streptomycetaceae	no rank	6	2	6	2	0	27	27
Bacteria	no rank	Actinobacteria	Actinobacteria	Streptosporangiales	Nocardiopsaceae	Actinorugispora	1	0	1	0	0	7	7
Bacteria	no rank	Actinobacteria	Actinobacteria	Streptosporangiales	Nocardiopsaceae	Allosalinactinospora	1	0	1	0	0	6	6
Bacteria	no rank	Actinobacteria	Actinobacteria	Streptosporangiales	Nocardiopsaceae	Haloactinospora	1	0	1	0	0	6	6
Bacteria	no rank	Actinobacteria	Actinobacteria	Streptosporangiales	Nocardiopsaceae	Marinactinospora	1	0	1	0	0	8	8
Bacteria	no rank	Actinobacteria	Actinobacteria	Streptosporangiales	Nocardiopsaceae	Marinitenerispora	3	0	3	0	0	29	29
Bacteria	no rank	Actinobacteria	Actinobacteria	Streptosporangiales	Nocardiopsaceae	Murinocardiopsis	1	0	1	0	0	12	12
Bacteria	no rank	Actinobacteria	Actinobacteria	Streptosporangiales	Nocardiopsaceae	Nocardiopsis	41	0	41	0	4	315	315
Bacteria	no rank	Actinobacteria	Actinobacteria	Streptosporangiales	Nocardiopsaceae	Streptomonospora	2	0	2	0	0	18	18
Bacteria	no rank	Actinobacteria	Actinobacteria	Streptosporangiales	Nocardiopsaceae	Thermobifida	9	0	9	0	0	44	44
Bacteria	no rank	Actinobacteria	Actinobacteria	Streptosporangiales	Nocardiopsaceae	no rank	1	0	1	0	0	6	6
Bacteria	no rank	Actinobacteria	Actinobacteria	Streptosporangiales	Streptosporangiaceae	Herbidospora	7	7	7	7	0	63	63
Bacteria	no rank	Actinobacteria	Actinobacteria	Streptosporangiales	Streptosporangiaceae	Microbispora	15	13	15	13	2	191	191
Bacteria	no rank	Actinobacteria	Actinobacteria	Streptosporangiales	Streptosporangiaceae	Microtetraspora	3	3	3	3	0	52	52
Bacteria	no rank	Actinobacteria	Actinobacteria	Streptosporangiales	Streptosporangiaceae	Nonomuraea	29	27	29	27	3	464	464
Bacteria	no rank	Actinobacteria	Actinobacteria	Streptosporangiales	Streptosporangiaceae	Planobispora	1	1	1	1	1	41	38
Bacteria	no rank	Actinobacteria	Actinobacteria	Streptosporangiales	Streptosporangiaceae	Planomonospora	1	0	1	0	0	23	23
Bacteria	no rank	Actinobacteria	Actinobacteria	Streptosporangiales	Streptosporangiaceae	Sinosporangium	1	1	1	1	0	11	11
Bacteria	no rank	Actinobacteria	Actinobacteria	Streptosporangiales	Streptosporangiaceae	Sphaerisporangium	3	3	3	3	2	30	30
Bacteria	no rank	Actinobacteria	Actinobacteria	Streptosporangiales	Streptosporangiaceae	Streptosporangium	8	8	8	8	0	128	128
Bacteria	no rank	Actinobacteria	Actinobacteria	Streptosporangiales	Streptosporangiaceae	Thermoactinospora	1	1	1	1	0	14	14
Bacteria	no rank	Actinobacteria	Actinobacteria	Streptosporangiales	Streptosporangiaceae	Thermopolyspora	1	1	1	1	0	10	10
Bacteria	no rank	Actinobacteria	Actinobacteria	Streptosporangiales	Streptosporangiaceae	no rank	1	1	1	1	0	13	13
Bacteria	no rank	Actinobacteria	Actinobacteria	Streptosporangiales	Thermomonosporaceae	Actinoallomurus	1	1	1	1	1	13	13
Bacteria	no rank	Actinobacteria	Actinobacteria	Streptosporangiales	Thermomonosporaceae	Actinocorallia	2	2	2	2	0	26	26
Bacteria	no rank	Actinobacteria	Actinobacteria	Streptosporangiales	Thermomonosporaceae	Actinomadura	49	48	49	48	7	515	515
Bacteria	no rank	Actinobacteria	Actinobacteria	Streptosporangiales	Thermomonosporaceae	Spirillospora	1	1	1	1	0	21	21
Bacteria	no rank	Actinobacteria	Actinobacteria	Streptosporangiales	Thermomonosporaceae	Thermomonospora	2	2	2	2	0	21	21
Bacteria	no rank	Actinobacteria	Actinobacteria	Streptosporangiales	Thermomonosporaceae	Thermostaphylospora	1	1	1	1	0	11	11
Bacteria	no rank	Actinobacteria	Actinobacteria	Streptosporangiales	no rank	Allonocardiopsis	1	1	1	1	0	6	6
Bacteria	no rank	Actinobacteria	Actinobacteria	no rank	no rank	Halopolyspora	2	2	2	2	0	73	73
Bacteria	no rank	Actinobacteria	Actinobacteria	no rank	no rank	Thermobispora	1	0	1	0	0	13	13
Bacteria	no rank	Actinobacteria	Actinobacteria	no rank	no rank	no rank	135	75	134	76	6	1297	1297
Bacteria	no rank	Actinobacteria	Coriobacteriia	Coriobacteriales	Atopobiaceae	Atopobium	22	0	0	22	1	23	23
Bacteria	no rank	Actinobacteria	Coriobacteriia	Coriobacteriales	Atopobiaceae	Libanicoccus	1	1	1	1	0	3	3
Bacteria	no rank	Actinobacteria	Coriobacteriia	Coriobacteriales	Atopobiaceae	Olsenella	41	31	31	41	4	122	122
Bacteria	no rank	Actinobacteria	Coriobacteriia	Coriobacteriales	Atopobiaceae	Parolsenella	1	1	1	1	0	2	2
Bacteria	no rank	Actinobacteria	Coriobacteriia	Coriobacteriales	Atopobiaceae	no rank	3	2	2	3	0	5	5
Bacteria	no rank	Actinobacteria	Coriobacteriia	Coriobacteriales	Coriobacteriaceae	Collinsella	127	103	106	124	11	609	604
Bacteria	no rank	Actinobacteria	Coriobacteriia	Coriobacteriales	Coriobacteriaceae	Coriobacterium	1	1	1	1	0	2	2
Bacteria	no rank	Actinobacteria	Coriobacteriia	Coriobacteriales	Coriobacteriaceae	Enorma	9	2	2	9	0	12	12
Bacteria	no rank	Actinobacteria	Coriobacteriia	Coriobacteriales	Coriobacteriaceae	Olegusella	2	0	0	2	0	2	2
Bacteria	no rank	Actinobacteria	Coriobacteriia	Coriobacteriales	Coriobacteriaceae	Parvibacter	1	0	1	0	0	1	1
Bacteria	no rank	Actinobacteria	Coriobacteriia	Coriobacteriales	Coriobacteriaceae	Senegalimassilia	4	0	4	0	1	16	16
Bacteria	no rank	Actinobacteria	Coriobacteriia	Coriobacteriales	Coriobacteriaceae	no rank	34	29	29	34	3	177	177
Bacteria	no rank	Actinobacteria	Coriobacteriia	Coriobacteriales	no rank	no rank	1	1	1	1	0	2	2
Bacteria	no rank	Actinobacteria	Coriobacteriia	Eggerthellales	Eggerthellaceae	Adlercreutzia	3	0	3	0	0	10	10
Bacteria	no rank	Actinobacteria	Coriobacteriia	Eggerthellales	Eggerthellaceae	Arabia	1	0	1	0	0	34	34
Bacteria	no rank	Actinobacteria	Coriobacteriia	Eggerthellales	Eggerthellaceae	Asaccharobacter	4	0	4	0	0	12	12
Bacteria	no rank	Actinobacteria	Coriobacteriia	Eggerthellales	Eggerthellaceae	Cryptobacterium	1	0	0	0	1	1	1
Bacteria	no rank	Actinobacteria	Coriobacteriia	Eggerthellales	Eggerthellaceae	Denitrobacterium	2	0	2	0	0	24	24
Bacteria	no rank	Actinobacteria	Coriobacteriia	Eggerthellales	Eggerthellaceae	Eggerthella	41	0	41	0	1	773	769
Bacteria	no rank	Actinobacteria	Coriobacteriia	Eggerthellales	Eggerthellaceae	Enterorhabdus	4	0	4	0	0	10	10
Bacteria	no rank	Actinobacteria	Coriobacteriia	Eggerthellales	Eggerthellaceae	Enteroscipio	2	0	2	0	2	36	36
Bacteria	no rank	Actinobacteria	Coriobacteriia	Eggerthellales	Eggerthellaceae	Gordonibacter	12	0	11	0	1	252	252
Bacteria	no rank	Actinobacteria	Coriobacteriia	Eggerthellales	Eggerthellaceae	Paraeggerthella	2	0	2	0	0	39	39
Bacteria	no rank	Actinobacteria	Coriobacteriia	Eggerthellales	Eggerthellaceae	Raoultibacter	3	0	3	0	0	82	82
Bacteria	no rank	Actinobacteria	Coriobacteriia	Eggerthellales	Eggerthellaceae	Rubneribacter	1	0	0	0	1	1	1
Bacteria	no rank	Actinobacteria	Coriobacteriia	Eggerthellales	Eggerthellaceae	Slackia	8	0	8	0	2	17	17
Bacteria	no rank	Actinobacteria	Coriobacteriia	Eggerthellales	Eggerthellaceae	no rank	5	0	4	0	2	64	64
Bacteria	no rank	Actinobacteria	Coriobacteriia	no rank	no rank	no rank	3	2	3	2	0	18	18
Bacteria	no rank	Actinobacteria	Nitriliruptoria	Egibacterales	Egibacteraceae	Egibacter	1	1	1	1	0	29	29
Bacteria	no rank	Actinobacteria	Nitriliruptoria	Egicoccales	Egicoccaceae	Egicoccus	1	1	1	1	0	27	27
Bacteria	no rank	Actinobacteria	Nitriliruptoria	Euzebyales	Euzebyaceae	Euzebya	3	3	3	3	1	165	165
Bacteria	no rank	Actinobacteria	Nitriliruptoria	Nitriliruptorales	Nitriliruptoraceae	Nitriliruptor	4	4	4	4	1	71	71
Bacteria	no rank	Actinobacteria	Rubrobacteria	Gaiellales	Gaiellaceae	Gaiella	1	1	1	1	0	10	10
Bacteria	no rank	Actinobacteria	Rubrobacteria	Gaiellales	no rank	no rank	1	1	1	1	0	19	19
Bacteria	no rank	Actinobacteria	Rubrobacteria	Rubrobacterales	Baekduiaceae	Baekduia	1	1	1	1	0	32	32
Bacteria	no rank	Actinobacteria	Rubrobacteria	Rubrobacterales	Rubrobacteraceae	Rubrobacter	7	7	7	7	1	86	86
Bacteria	no rank	Actinobacteria	Thermoleophilia	Solirubrobacterales	Conexibacteraceae	Conexibacter	4	4	4	4	1	119	119
Bacteria	no rank	Actinobacteria	Thermoleophilia	Solirubrobacterales	Patulibacteraceae	Patulibacter	3	3	3	3	0	67	67
Bacteria	no rank	Actinobacteria	Thermoleophilia	Solirubrobacterales	Solirubrobacteraceae	Solirubrobacter	3	3	3	3	0	161	161
Bacteria	no rank	Actinobacteria	Thermoleophilia	Solirubrobacterales	no rank	no rank	6	3	6	3	0	82	82
Bacteria	no rank	Actinobacteria	Thermoleophilia	Thermoleophilales	Thermoleophilaceae	Thermoleophilum	1	1	1	1	0	22	22
Bacteria	no rank	Actinobacteria	Thermoleophilia	no rank	no rank	no rank	1	0	1	0	0	1	1
Bacteria	no rank	Actinobacteria	no rank	no rank	no rank	no rank	59	22	59	22	4	430	430
Bacteria	no rank	Aquificae	Aquificae	Aquificales	Aquificaceae	Aquifex	3	3	3	3	0	28	28
Bacteria	no rank	Aquificae	Aquificae	Aquificales	Aquificaceae	Hydrogenivirga	2	2	2	2	0	55	55
Bacteria	no rank	Aquificae	Aquificae	Aquificales	Aquificaceae	Hydrogenobacter	3	3	3	3	0	15	15
Bacteria	no rank	Aquificae	Aquificae	Aquificales	Aquificaceae	Hydrogenobaculum	7	6	7	6	0	75	75
Bacteria	no rank	Aquificae	Aquificae	Aquificales	Aquificaceae	Thermocrinis	4	4	4	4	0	26	26
Bacteria	no rank	Aquificae	Aquificae	Aquificales	Aquificaceae	no rank	2	1	2	1	0	8	8
Bacteria	no rank	Aquificae	Aquificae	Aquificales	Hydrogenothermaceae	Hydrogenothermus	2	2	2	2	0	29	29
Bacteria	no rank	Aquificae	Aquificae	Aquificales	Hydrogenothermaceae	Persephonella	8	7	8	7	0	115	115
Bacteria	no rank	Aquificae	Aquificae	Aquificales	Hydrogenothermaceae	Sulfurihydrogenibium	6	5	6	5	0	45	45
Bacteria	no rank	Aquificae	Aquificae	Aquificales	no rank	Thermosulfidibacter	1	1	1	1	0	19	19
Bacteria	no rank	Aquificae	Aquificae	Desulfurobacteriales	Desulfurobacteriaceae	Balnearium	1	1	1	1	0	14	14
Bacteria	no rank	Aquificae	Aquificae	Desulfurobacteriales	Desulfurobacteriaceae	Desulfurobacterium	6	6	6	6	0	77	77
Bacteria	no rank	Aquificae	Aquificae	Desulfurobacteriales	Desulfurobacteriaceae	Phorcysia	1	1	1	1	0	13	13
Bacteria	no rank	Aquificae	Aquificae	Desulfurobacteriales	Desulfurobacteriaceae	Thermovibrio	4	4	4	4	0	31	31
Bacteria	no rank	Aquificae	no rank	no rank	no rank	no rank	7	1	7	1	0	34	34
Bacteria	no rank	Armatimonadetes	Armatimonadia	Capsulimonadales	Capsulimonadaceae	Capsulimonas	1	1	1	1	0	52	52
Bacteria	no rank	Armatimonadetes	Chthonomonadetes	Chthonomonadales	Chthonomonadaceae	Chthonomonas	4	4	4	4	3	35	35
Bacteria	no rank	Armatimonadetes	Fimbriimonadia	Fimbriimonadales	Fimbriimonadaceae	Fimbriimonas	1	1	1	1	0	12	12
Bacteria	no rank	Armatimonadetes	no rank	no rank	no rank	no rank	33	19	33	19	3	199	199
Bacteria	no rank	Bacteroidetes	Bacteroidia	Bacteroidales	Bacteroidaceae	Anaerorhabdus	1	1	1	1	0	22	22
Bacteria	no rank	Bacteroidetes	Bacteroidia	Bacteroidales	Bacteroidaceae	Bacteroides	1109	11	11	1107	140	1344	1313
Bacteria	no rank	Bacteroidetes	Bacteroidia	Bacteroidales	Bacteroidaceae	Mediterranea	2	0	0	2	0	2	2
Bacteria	no rank	Bacteroidetes	Bacteroidia	Bacteroidales	Bacteroidaceae	no rank	6	0	0	6	0	6	6
Bacteria	no rank	Bacteroidetes	Bacteroidia	Bacteroidales	Balneicellaceae	Balneicella	1	0	0	1	0	1	1
Bacteria	no rank	Bacteroidetes	Bacteroidia	Bacteroidales	Barnesiellaceae	Barnesiella	5	0	0	5	1	6	6
Bacteria	no rank	Bacteroidetes	Bacteroidia	Bacteroidales	Barnesiellaceae	Coprobacter	4	0	0	3	1	4	4
Bacteria	no rank	Bacteroidetes	Bacteroidia	Bacteroidales	Dysgonamonadaceae	Dysgonomonas	18	1	1	17	2	22	20
Bacteria	no rank	Bacteroidetes	Bacteroidia	Bacteroidales	Dysgonamonadaceae	Proteiniphilum	3	0	0	3	0	3	3
Bacteria	no rank	Bacteroidetes	Bacteroidia	Bacteroidales	Dysgonamonadaceae	no rank	1	0	0	1	0	1	1
Bacteria	no rank	Bacteroidetes	Bacteroidia	Bacteroidales	Lentimicrobiaceae	Lentimicrobium	1	0	0	1	0	1	1
Bacteria	no rank	Bacteroidetes	Bacteroidia	Bacteroidales	Muribaculaceae	Candidatus Amulumruptor	1	0	0	1	0	1	1
Bacteria	no rank	Bacteroidetes	Bacteroidia	Bacteroidales	Muribaculaceae	Duncaniella	4	0	0	4	0	4	4
Bacteria	no rank	Bacteroidetes	Bacteroidia	Bacteroidales	Muribaculaceae	Muribaculum	11	0	0	11	3	14	14
Bacteria	no rank	Bacteroidetes	Bacteroidia	Bacteroidales	Muribaculaceae	Paramuribaculum	2	0	0	2	2	4	4
Bacteria	no rank	Bacteroidetes	Bacteroidia	Bacteroidales	Muribaculaceae	no rank	25	0	0	25	4	29	29
Bacteria	no rank	Bacteroidetes	Bacteroidia	Bacteroidales	Odoribacteraceae	Butyricimonas	17	0	0	17	0	17	17
Bacteria	no rank	Bacteroidetes	Bacteroidia	Bacteroidales	Odoribacteraceae	Culturomica	2	0	0	2	0	2	2
Bacteria	no rank	Bacteroidetes	Bacteroidia	Bacteroidales	Odoribacteraceae	Odoribacter	20	0	0	20	1	21	21
Bacteria	no rank	Bacteroidetes	Bacteroidia	Bacteroidales	Paludibacteraceae	Paludibacter	4	0	0	4	0	4	4
Bacteria	no rank	Bacteroidetes	Bacteroidia	Bacteroidales	Porphyromonadaceae	Fermentimonas	1	0	0	1	0	1	1
Bacteria	no rank	Bacteroidetes	Bacteroidia	Bacteroidales	Porphyromonadaceae	Gabonia	1	0	0	1	0	1	1
Bacteria	no rank	Bacteroidetes	Bacteroidia	Bacteroidales	Porphyromonadaceae	Gabonibacter	1	0	0	1	0	1	1
Bacteria	no rank	Bacteroidetes	Bacteroidia	Bacteroidales	Porphyromonadaceae	Lascolabacillus	1	0	0	1	0	1	1
Bacteria	no rank	Bacteroidetes	Bacteroidia	Bacteroidales	Porphyromonadaceae	Macellibacteroides	1	0	0	1	0	1	1
Bacteria	no rank	Bacteroidetes	Bacteroidia	Bacteroidales	Porphyromonadaceae	Massilibacteroides	1	0	0	1	0	1	1
Bacteria	no rank	Bacteroidetes	Bacteroidia	Bacteroidales	Porphyromonadaceae	Petrimonas	2	0	0	2	0	2	2
Bacteria	no rank	Bacteroidetes	Bacteroidia	Bacteroidales	Porphyromonadaceae	Porphyromonas	127	0	0	127	1	129	128
Bacteria	no rank	Bacteroidetes	Bacteroidia	Bacteroidales	Porphyromonadaceae	Sanguibacteroides	3	0	0	3	0	3	3
Bacteria	no rank	Bacteroidetes	Bacteroidia	Bacteroidales	Porphyromonadaceae	no rank	15	0	0	15	0	15	15
Bacteria	no rank	Bacteroidetes	Bacteroidia	Bacteroidales	Prevotellaceae	Alloprevotella	7	0	0	7	0	8	8
Bacteria	no rank	Bacteroidetes	Bacteroidia	Bacteroidales	Prevotellaceae	Paraprevotella	5	0	0	5	0	5	5
Bacteria	no rank	Bacteroidetes	Bacteroidia	Bacteroidales	Prevotellaceae	Prevotella	338	0	0	336	23	380	360
Bacteria	no rank	Bacteroidetes	Bacteroidia	Bacteroidales	Prevotellaceae	Prevotellamassilia	1	0	0	1	1	2	2
Bacteria	no rank	Bacteroidetes	Bacteroidia	Bacteroidales	Prevotellaceae	no rank	11	0	0	11	3	14	14
Bacteria	no rank	Bacteroidetes	Bacteroidia	Bacteroidales	Rikenellaceae	Acetobacteroides	1	0	0	1	0	1	1
Bacteria	no rank	Bacteroidetes	Bacteroidia	Bacteroidales	Rikenellaceae	Alistipes	61	0	0	61	2	68	63
Bacteria	no rank	Bacteroidetes	Bacteroidia	Bacteroidales	Rikenellaceae	Millionella	1	0	0	1	0	1	1
Bacteria	no rank	Bacteroidetes	Bacteroidia	Bacteroidales	Rikenellaceae	Mucinivorans	1	0	0	1	0	1	1
Bacteria	no rank	Bacteroidetes	Bacteroidia	Bacteroidales	Rikenellaceae	Rikenella	2	0	0	2	0	2	2
Bacteria	no rank	Bacteroidetes	Bacteroidia	Bacteroidales	Rikenellaceae	Tidjanibacter	1	0	0	1	0	1	1
Bacteria	no rank	Bacteroidetes	Bacteroidia	Bacteroidales	Rikenellaceae	no rank	7	0	0	7	0	7	7
Bacteria	no rank	Bacteroidetes	Bacteroidia	Bacteroidales	Tannerellaceae	Parabacteroides	181	0	0	181	45	229	228
Bacteria	no rank	Bacteroidetes	Bacteroidia	Bacteroidales	Tannerellaceae	Tannerella	17	2	2	17	0	21	20
Bacteria	no rank	Bacteroidetes	Bacteroidia	Bacteroidales	Williamwhitmaniaceae	Williamwhitmania	1	0	0	1	0	1	1
Bacteria	no rank	Bacteroidetes	Bacteroidia	Bacteroidales	no rank	Candidatus Azobacteroides	2	0	0	2	0	2	2
Bacteria	no rank	Bacteroidetes	Bacteroidia	Bacteroidales	no rank	Phocaeicola	1	0	0	1	0	1	1
Bacteria	no rank	Bacteroidetes	Bacteroidia	Bacteroidales	no rank	no rank	32	2	2	32	2	38	38
Bacteria	no rank	Bacteroidetes	Bacteroidia	Marinilabiliales	Marinifilaceae	Ancylomarina	4	0	0	4	1	6	6
Bacteria	no rank	Bacteroidetes	Bacteroidia	Marinilabiliales	Marinifilaceae	Labilibaculum	3	0	0	3	1	4	4
Bacteria	no rank	Bacteroidetes	Bacteroidia	Marinilabiliales	Marinifilaceae	Marinifilum	4	1	1	4	0	36	36
Bacteria	no rank	Bacteroidetes	Bacteroidia	Marinilabiliales	Marinifilaceae	no rank	1	0	0	1	1	2	2
Bacteria	no rank	Bacteroidetes	Bacteroidia	Marinilabiliales	Marinilabiliaceae	Alkaliflexus	1	0	0	1	0	1	1
Bacteria	no rank	Bacteroidetes	Bacteroidia	Marinilabiliales	Marinilabiliaceae	Alkalitalea	2	0	0	2	0	2	2
Bacteria	no rank	Bacteroidetes	Bacteroidia	Marinilabiliales	Marinilabiliaceae	Anaerophaga	2	0	0	2	0	2	2
Bacteria	no rank	Bacteroidetes	Bacteroidia	Marinilabiliales	Marinilabiliaceae	Carboxylicivirga	1	0	0	1	1	3	3
Bacteria	no rank	Bacteroidetes	Bacteroidia	Marinilabiliales	Marinilabiliaceae	Geofilum	2	0	0	2	1	3	3
Bacteria	no rank	Bacteroidetes	Bacteroidia	Marinilabiliales	Marinilabiliaceae	Labilibacter	3	0	0	3	1	4	4
Bacteria	no rank	Bacteroidetes	Bacteroidia	Marinilabiliales	Marinilabiliaceae	Marinilabilia	5	0	0	5	0	5	5
Bacteria	no rank	Bacteroidetes	Bacteroidia	Marinilabiliales	Marinilabiliaceae	Natronoflexus	1	0	0	1	0	1	1
Bacteria	no rank	Bacteroidetes	Bacteroidia	Marinilabiliales	Marinilabiliaceae	Saccharicrinis	3	0	0	3	0	3	3
Bacteria	no rank	Bacteroidetes	Bacteroidia	Marinilabiliales	Marinilabiliaceae	Thermophagus	2	0	0	2	0	2	2
Bacteria	no rank	Bacteroidetes	Bacteroidia	Marinilabiliales	Marinilabiliaceae	no rank	1	0	0	1	1	2	2
Bacteria	no rank	Bacteroidetes	Bacteroidia	Marinilabiliales	Prolixibacteraceae	Draconibacterium	3	0	0	3	0	3	3
Bacteria	no rank	Bacteroidetes	Bacteroidia	Marinilabiliales	Prolixibacteraceae	Mangrovibacterium	2	0	0	2	0	2	2
Bacteria	no rank	Bacteroidetes	Bacteroidia	Marinilabiliales	Prolixibacteraceae	Maribellus	1	1	1	1	0	2	2
Bacteria	no rank	Bacteroidetes	Bacteroidia	Marinilabiliales	Prolixibacteraceae	Mariniphaga	2	0	0	2	0	2	2
Bacteria	no rank	Bacteroidetes	Bacteroidia	Marinilabiliales	Prolixibacteraceae	Prolixibacter	5	0	0	5	3	8	8
Bacteria	no rank	Bacteroidetes	Bacteroidia	Marinilabiliales	Prolixibacteraceae	Sunxiuqinia	4	0	0	4	2	8	8
Bacteria	no rank	Bacteroidetes	Bacteroidia	Marinilabiliales	Prolixibacteraceae	Tangfeifania	1	0	0	1	0	1	1
Bacteria	no rank	Bacteroidetes	Bacteroidia	Marinilabiliales	Prolixibacteraceae	no rank	1	0	0	1	1	2	2
Bacteria	no rank	Bacteroidetes	Bacteroidia	Marinilabiliales	Salinivirgaceae	Salinivirga	1	0	0	1	0	1	1
Bacteria	no rank	Bacteroidetes	Bacteroidia	Marinilabiliales	Salinivirgaceae	no rank	1	0	0	1	0	1	1
Bacteria	no rank	Bacteroidetes	Bacteroidia	Marinilabiliales	no rank	no rank	8	1	1	8	0	9	9
Bacteria	no rank	Bacteroidetes	Bacteroidia	no rank	no rank	no rank	8	0	0	8	1	10	10
Bacteria	no rank	Bacteroidetes	Chitinophagia	Chitinophagales	Chitinophagaceae	Asinibacterium	1	0	0	0	1	1	1
Bacteria	no rank	Bacteroidetes	Chitinophagia	Chitinophagales	Chitinophagaceae	Chitinophaga	50	0	0	50	7	57	57
Bacteria	no rank	Bacteroidetes	Chitinophagia	Chitinophagales	Chitinophagaceae	Cnuella	2	0	0	0	2	2	2
Bacteria	no rank	Bacteroidetes	Chitinophagia	Chitinophagales	Chitinophagaceae	Crenotalea	1	0	0	1	0	1	1
Bacteria	no rank	Bacteroidetes	Chitinophagia	Chitinophagales	Chitinophagaceae	Flavisolibacter	1	0	0	0	1	1	1
Bacteria	no rank	Bacteroidetes	Chitinophagia	Chitinophagales	Chitinophagaceae	Ilyomonas	1	0	0	0	1	1	1
Bacteria	no rank	Bacteroidetes	Chitinophagia	Chitinophagales	Chitinophagaceae	Lacibacter	2	0	1	0	2	6	6
Bacteria	no rank	Bacteroidetes	Chitinophagia	Chitinophagales	Chitinophagaceae	Niastella	4	0	1	0	3	4	4
Bacteria	no rank	Bacteroidetes	Chitinophagia	Chitinophagales	Chitinophagaceae	Parafilimonas	1	0	0	0	1	1	1
Bacteria	no rank	Bacteroidetes	Chitinophagia	Chitinophagales	Chitinophagaceae	Pseudobacter	2	0	0	0	2	2	2
Bacteria	no rank	Bacteroidetes	Chitinophagia	Chitinophagales	Chitinophagaceae	Sediminibacterium	1	0	0	0	1	1	1
Bacteria	no rank	Bacteroidetes	Chitinophagia	Chitinophagales	Chitinophagaceae	Thermoflavifilum	1	0	0	1	0	1	1
Bacteria	no rank	Bacteroidetes	Chitinophagia	Chitinophagales	Chitinophagaceae	Vibrionimonas	1	0	0	0	1	1	1
Bacteria	no rank	Bacteroidetes	Chitinophagia	Chitinophagales	Chitinophagaceae	no rank	13	1	5	4	5	23	23
Bacteria	no rank	Bacteroidetes	Cytophagia	Cytophagales	Amoebophilaceae	Candidatus Amoebophilus	2	0	0	2	0	2	2
Bacteria	no rank	Bacteroidetes	Cytophagia	Cytophagales	Amoebophilaceae	Candidatus Cardinium	7	0	0	7	0	7	7
Bacteria	no rank	Bacteroidetes	Cytophagia	Cytophagales	Bernardetiaceae	Bernardetia	1	0	0	1	0	1	1
Bacteria	no rank	Bacteroidetes	Cytophagia	Cytophagales	Bernardetiaceae	Hugenholtzia	1	0	0	1	0	1	1
Bacteria	no rank	Bacteroidetes	Cytophagia	Cytophagales	Catalimonadaceae	Catalinimonas	1	0	0	1	0	1	1
Bacteria	no rank	Bacteroidetes	Cytophagia	Cytophagales	Cyclobacteriaceae	Algoriphagus	39	1	2	38	7	50	50
Bacteria	no rank	Bacteroidetes	Cytophagia	Cytophagales	Cyclobacteriaceae	Aquiflexum	2	0	0	2	1	3	3
Bacteria	no rank	Bacteroidetes	Cytophagia	Cytophagales	Cyclobacteriaceae	Belliella	3	0	0	3	1	5	5
Bacteria	no rank	Bacteroidetes	Cytophagia	Cytophagales	Cyclobacteriaceae	Cecembia	3	0	0	3	1	4	4
Bacteria	no rank	Bacteroidetes	Cytophagia	Cytophagales	Cyclobacteriaceae	Cyclobacterium	8	0	0	8	3	11	11
Bacteria	no rank	Bacteroidetes	Cytophagia	Cytophagales	Cyclobacteriaceae	Echinicola	5	0	0	5	2	7	7
Bacteria	no rank	Bacteroidetes	Cytophagia	Cytophagales	Cyclobacteriaceae	Indibacter	1	0	0	1	0	1	1
Bacteria	no rank	Bacteroidetes	Cytophagia	Cytophagales	Cyclobacteriaceae	Litoribacter	1	0	0	1	1	2	2
Bacteria	no rank	Bacteroidetes	Cytophagia	Cytophagales	Cyclobacteriaceae	Lunatimonas	1	0	0	1	0	1	1
Bacteria	no rank	Bacteroidetes	Cytophagia	Cytophagales	Cyclobacteriaceae	Mariniradius	1	0	0	1	1	2	2
Bacteria	no rank	Bacteroidetes	Cytophagia	Cytophagales	Cyclobacteriaceae	Mongoliibacter	2	0	0	2	0	2	2
Bacteria	no rank	Bacteroidetes	Cytophagia	Cytophagales	Cyclobacteriaceae	Negadavirga	1	0	0	1	0	1	1
Bacteria	no rank	Bacteroidetes	Cytophagia	Cytophagales	Cyclobacteriaceae	Nitritalea	1	0	0	1	0	1	1
Bacteria	no rank	Bacteroidetes	Cytophagia	Cytophagales	Cyclobacteriaceae	no rank	1	0	0	1	0	1	1
Bacteria	no rank	Bacteroidetes	Cytophagia	Cytophagales	Cytophagaceae	Anditalea	1	0	0	1	1	2	2
Bacteria	no rank	Bacteroidetes	Cytophagia	Cytophagales	Cytophagaceae	Arcicella	1	0	0	1	0	1	1
Bacteria	no rank	Bacteroidetes	Cytophagia	Cytophagales	Cytophagaceae	Arsenicibacter	1	0	0	1	1	2	2
Bacteria	no rank	Bacteroidetes	Cytophagia	Cytophagales	Cytophagaceae	Arundinibacter	1	0	0	1	0	1	1
Bacteria	no rank	Bacteroidetes	Cytophagia	Cytophagales	Cytophagaceae	Chryseotalea	1	0	0	1	1	2	2
Bacteria	no rank	Bacteroidetes	Cytophagia	Cytophagales	Cytophagaceae	Cytophaga	4	0	0	4	0	4	4
Bacteria	no rank	Bacteroidetes	Cytophagia	Cytophagales	Cytophagaceae	Dyadobacter	20	0	0	20	3	23	23
Bacteria	no rank	Bacteroidetes	Cytophagia	Cytophagales	Cytophagaceae	Ekhidna	1	0	0	1	0	1	1
Bacteria	no rank	Bacteroidetes	Cytophagia	Cytophagales	Cytophagaceae	Emticicia	4	0	0	4	1	5	5
Bacteria	no rank	Bacteroidetes	Cytophagia	Cytophagales	Cytophagaceae	Fibrella	2	0	0	2	1	3	3
Bacteria	no rank	Bacteroidetes	Cytophagia	Cytophagales	Cytophagaceae	Fibrisoma	2	0	0	2	1	4	4
Bacteria	no rank	Bacteroidetes	Cytophagia	Cytophagales	Cytophagaceae	Flectobacillus	2	0	0	2	0	2	2
Bacteria	no rank	Bacteroidetes	Cytophagia	Cytophagales	Cytophagaceae	Flexibacter	2	0	0	2	0	2	2
Bacteria	no rank	Bacteroidetes	Cytophagia	Cytophagales	Cytophagaceae	Larkinella	7	1	1	7	1	9	9
Bacteria	no rank	Bacteroidetes	Cytophagia	Cytophagales	Cytophagaceae	Marinoscillum	1	0	0	1	0	1	1
Bacteria	no rank	Bacteroidetes	Cytophagia	Cytophagales	Cytophagaceae	Ohtaekwangia	1	0	0	1	0	1	1
Bacteria	no rank	Bacteroidetes	Cytophagia	Cytophagales	Cytophagaceae	Pseudarcicella	1	0	0	1	0	1	1
Bacteria	no rank	Bacteroidetes	Cytophagia	Cytophagales	Cytophagaceae	Rhodonellum	3	0	0	3	0	3	3
Bacteria	no rank	Bacteroidetes	Cytophagia	Cytophagales	Cytophagaceae	Rudanella	1	0	0	1	1	2	2
Bacteria	no rank	Bacteroidetes	Cytophagia	Cytophagales	Cytophagaceae	Runella	7	0	0	7	3	11	11
Bacteria	no rank	Bacteroidetes	Cytophagia	Cytophagales	Cytophagaceae	Siphonobacter	5	1	1	5	1	8	8
Bacteria	no rank	Bacteroidetes	Cytophagia	Cytophagales	Cytophagaceae	Spirosoma	18	0	0	17	7	28	28
Bacteria	no rank	Bacteroidetes	Cytophagia	Cytophagales	Cytophagaceae	Sporocytophaga	2	0	0	2	0	2	2
Bacteria	no rank	Bacteroidetes	Cytophagia	Cytophagales	Cytophagaceae	no rank	5	1	2	4	1	48	48
Bacteria	no rank	Bacteroidetes	Cytophagia	Cytophagales	Flammeovirgaceae	Cesiribacter	1	0	0	1	0	1	1
Bacteria	no rank	Bacteroidetes	Cytophagia	Cytophagales	Flammeovirgaceae	Fabibacter	5	0	0	5	2	7	7
Bacteria	no rank	Bacteroidetes	Cytophagia	Cytophagales	Flammeovirgaceae	Flammeovirga	6	0	0	6	1	7	7
Bacteria	no rank	Bacteroidetes	Cytophagia	Cytophagales	Flammeovirgaceae	Flexithrix	1	0	0	1	0	1	1
Bacteria	no rank	Bacteroidetes	Cytophagia	Cytophagales	Flammeovirgaceae	Fulvivirga	2	0	0	2	1	3	3
Bacteria	no rank	Bacteroidetes	Cytophagia	Cytophagales	Flammeovirgaceae	Marivirga	2	0	0	2	0	2	2
Bacteria	no rank	Bacteroidetes	Cytophagia	Cytophagales	Flammeovirgaceae	Nafulsella	1	0	0	1	0	1	1
Bacteria	no rank	Bacteroidetes	Cytophagia	Cytophagales	Flammeovirgaceae	Reichenbachiella	5	0	0	5	1	6	6
Bacteria	no rank	Bacteroidetes	Cytophagia	Cytophagales	Flammeovirgaceae	Roseivirga	6	0	0	6	3	11	11
Bacteria	no rank	Bacteroidetes	Cytophagia	Cytophagales	Flammeovirgaceae	Sediminitomix	1	0	0	1	0	1	1
Bacteria	no rank	Bacteroidetes	Cytophagia	Cytophagales	Flammeovirgaceae	no rank	2	0	0	2	0	2	2
Bacteria	no rank	Bacteroidetes	Cytophagia	Cytophagales	Hymenobacteraceae	Adhaeribacter	4	0	0	4	1	5	5
Bacteria	no rank	Bacteroidetes	Cytophagia	Cytophagales	Hymenobacteraceae	Hymenobacter	57	1	3	54	15	183	183
Bacteria	no rank	Bacteroidetes	Cytophagia	Cytophagales	Hymenobacteraceae	Pontibacter	22	0	0	22	6	28	28
Bacteria	no rank	Bacteroidetes	Cytophagia	Cytophagales	Hymenobacteraceae	Rufibacter	7	0	0	7	1	8	8
Bacteria	no rank	Bacteroidetes	Cytophagia	Cytophagales	Hymenobacteraceae	Siccationidurans	1	0	0	1	1	4	4
Bacteria	no rank	Bacteroidetes	Cytophagia	Cytophagales	Hymenobacteraceae	no rank	1	0	0	1	0	1	1
Bacteria	no rank	Bacteroidetes	Cytophagia	Cytophagales	Microscillaceae	Eisenibacter	1	0	0	1	0	1	1
Bacteria	no rank	Bacteroidetes	Cytophagia	Cytophagales	Microscillaceae	Microscilla	1	0	0	1	1	2	2
Bacteria	no rank	Bacteroidetes	Cytophagia	Cytophagales	Persicobacteraceae	Persicobacter	1	0	0	1	0	1	1
Bacteria	no rank	Bacteroidetes	Cytophagia	Cytophagales	Raineyaceae	Raineya	1	0	0	1	0	1	1
Bacteria	no rank	Bacteroidetes	Cytophagia	Cytophagales	Thermonemataceae	Thermonema	1	0	0	1	0	1	1
Bacteria	no rank	Bacteroidetes	Cytophagia	Cytophagales	no rank	Chryseolinea	3	0	0	3	1	5	5
Bacteria	no rank	Bacteroidetes	Cytophagia	Cytophagales	no rank	Luteivirga	1	0	1	0	0	43	43
Bacteria	no rank	Bacteroidetes	Cytophagia	Cytophagales	no rank	Solirubrum	1	0	0	1	0	2	2
Bacteria	no rank	Bacteroidetes	Cytophagia	Cytophagales	no rank	Thermoflexibacter	1	0	0	1	0	1	1
Bacteria	no rank	Bacteroidetes	Cytophagia	Cytophagales	no rank	no rank	11	0	0	10	1	12	12
Bacteria	no rank	Bacteroidetes	Flavobacteriia	Flavobacteriales	Blattabacteriaceae	Blattabacterium	22	0	0	22	0	22	22
Bacteria	no rank	Bacteroidetes	Flavobacteriia	Flavobacteriales	Crocinitomicaceae	Brumimicrobium	1	0	0	0	1	1	1
Bacteria	no rank	Bacteroidetes	Flavobacteriia	Flavobacteriales	Crocinitomicaceae	Fluviicola	1	0	0	0	1	3	3
Bacteria	no rank	Bacteroidetes	Flavobacteriia	Flavobacteriales	Crocinitomicaceae	Lishizhenia	1	0	0	0	1	1	1
Bacteria	no rank	Bacteroidetes	Flavobacteriia	Flavobacteriales	Crocinitomicaceae	no rank	2	0	0	2	0	2	2
Bacteria	no rank	Bacteroidetes	Flavobacteriia	Flavobacteriales	Cryomorphaceae	Owenweeksia	1	0	0	1	0	1	1
Bacteria	no rank	Bacteroidetes	Flavobacteriia	Flavobacteriales	Cryomorphaceae	Vicingus	1	0	0	1	0	1	1
Bacteria	no rank	Bacteroidetes	Flavobacteriia	Flavobacteriales	Cryomorphaceae	no rank	10	0	0	10	0	10	10
Bacteria	no rank	Bacteroidetes	Flavobacteriia	Flavobacteriales	Flavobacteriaceae	Aequorivita	15	0	0	15	6	25	25
Bacteria	no rank	Bacteroidetes	Flavobacteriia	Flavobacteriales	Flavobacteriaceae	Algibacter	14	0	0	14	1	15	15
Bacteria	no rank	Bacteroidetes	Flavobacteriia	Flavobacteriales	Flavobacteriaceae	Altibacter	1	0	0	1	0	1	1
Bacteria	no rank	Bacteroidetes	Flavobacteriia	Flavobacteriales	Flavobacteriaceae	Antarcticibacterium	2	0	0	2	0	2	2
Bacteria	no rank	Bacteroidetes	Flavobacteriia	Flavobacteriales	Flavobacteriaceae	Aquimarina	33	0	0	33	5	38	38
Bacteria	no rank	Bacteroidetes	Flavobacteriia	Flavobacteriales	Flavobacteriaceae	Arenibacter	17	0	0	17	3	20	20
Bacteria	no rank	Bacteroidetes	Flavobacteriia	Flavobacteriales	Flavobacteriaceae	Arenitalea	2	0	0	2	0	2	2
Bacteria	no rank	Bacteroidetes	Flavobacteriia	Flavobacteriales	Flavobacteriaceae	Aureicoccus	1	0	0	1	0	1	1
Bacteria	no rank	Bacteroidetes	Flavobacteriia	Flavobacteriales	Flavobacteriaceae	Aureitalea	2	0	0	2	0	2	2
Bacteria	no rank	Bacteroidetes	Flavobacteriia	Flavobacteriales	Flavobacteriaceae	Bizionia	8	1	1	8	2	11	11
Bacteria	no rank	Bacteroidetes	Flavobacteriia	Flavobacteriales	Flavobacteriaceae	Capnocytophaga	64	0	0	64	7	74	74
Bacteria	no rank	Bacteroidetes	Flavobacteriia	Flavobacteriales	Flavobacteriaceae	Cellulophaga	17	1	1	17	4	22	22
Bacteria	no rank	Bacteroidetes	Flavobacteriia	Flavobacteriales	Flavobacteriaceae	Changchengzhania	1	0	0	1	0	1	1
Bacteria	no rank	Bacteroidetes	Flavobacteriia	Flavobacteriales	Flavobacteriaceae	Chishuiella	1	0	0	0	1	1	1
Bacteria	no rank	Bacteroidetes	Flavobacteriia	Flavobacteriales	Flavobacteriaceae	Chryseobacterium	79	0	8	1	77	103	103
Bacteria	no rank	Bacteroidetes	Flavobacteriia	Flavobacteriales	Flavobacteriaceae	Confluentibacter	3	0	0	3	2	6	6
Bacteria	no rank	Bacteroidetes	Flavobacteriia	Flavobacteriales	Flavobacteriaceae	Croceibacter	1	0	0	1	0	1	1
Bacteria	no rank	Bacteroidetes	Flavobacteriia	Flavobacteriales	Flavobacteriaceae	Croceitalea	1	0	0	1	0	1	1
Bacteria	no rank	Bacteroidetes	Flavobacteriia	Flavobacteriales	Flavobacteriaceae	Croceivirga	2	0	0	2	0	2	2
Bacteria	no rank	Bacteroidetes	Flavobacteriia	Flavobacteriales	Flavobacteriaceae	Dokdonia	10	0	0	10	1	11	11
Bacteria	no rank	Bacteroidetes	Flavobacteriia	Flavobacteriales	Flavobacteriaceae	Elizabethkingia	40	0	12	0	39	55	55
Bacteria	no rank	Bacteroidetes	Flavobacteriia	Flavobacteriales	Flavobacteriaceae	Empedobacter	2	0	1	0	1	65	65
Bacteria	no rank	Bacteroidetes	Flavobacteriia	Flavobacteriales	Flavobacteriaceae	Eudoraea	1	0	0	1	0	1	1
Bacteria	no rank	Bacteroidetes	Flavobacteriia	Flavobacteriales	Flavobacteriaceae	Euzebyella	1	0	0	1	0	1	1
Bacteria	no rank	Bacteroidetes	Flavobacteriia	Flavobacteriales	Flavobacteriaceae	Flagellimonas	8	0	0	8	1	9	9
Bacteria	no rank	Bacteroidetes	Flavobacteriia	Flavobacteriales	Flavobacteriaceae	Flavicella	1	0	0	1	0	1	1
Bacteria	no rank	Bacteroidetes	Flavobacteriia	Flavobacteriales	Flavobacteriaceae	Flavimarina	1	0	0	1	0	1	1
Bacteria	no rank	Bacteroidetes	Flavobacteriia	Flavobacteriales	Flavobacteriaceae	Flaviramulus	2	0	0	2	1	3	3
Bacteria	no rank	Bacteroidetes	Flavobacteriia	Flavobacteriales	Flavobacteriaceae	Flavivirga	2	0	0	2	0	2	2
Bacteria	no rank	Bacteroidetes	Flavobacteriia	Flavobacteriales	Flavobacteriaceae	Flavobacterium	97	0	15	8	83	121	121
Bacteria	no rank	Bacteroidetes	Flavobacteriia	Flavobacteriales	Flavobacteriaceae	Formosa	10	0	0	10	1	11	11
Bacteria	no rank	Bacteroidetes	Flavobacteriia	Flavobacteriales	Flavobacteriaceae	Gaetbulibacter	2	0	0	2	0	2	2
Bacteria	no rank	Bacteroidetes	Flavobacteriia	Flavobacteriales	Flavobacteriaceae	Galbibacter	1	0	0	1	0	1	1
Bacteria	no rank	Bacteroidetes	Flavobacteriia	Flavobacteriales	Flavobacteriaceae	Gelidibacter	6	0	0	6	2	8	8
Bacteria	no rank	Bacteroidetes	Flavobacteriia	Flavobacteriales	Flavobacteriaceae	Gillisia	8	0	0	8	2	10	10
Bacteria	no rank	Bacteroidetes	Flavobacteriia	Flavobacteriales	Flavobacteriaceae	Gilvibacter	1	0	0	1	0	1	1
Bacteria	no rank	Bacteroidetes	Flavobacteriia	Flavobacteriales	Flavobacteriaceae	Gramella	14	0	0	14	1	15	15
Bacteria	no rank	Bacteroidetes	Flavobacteriia	Flavobacteriales	Flavobacteriaceae	Hanstruepera	2	0	0	2	0	2	2
Bacteria	no rank	Bacteroidetes	Flavobacteriia	Flavobacteriales	Flavobacteriaceae	Hyunsoonleella	3	0	0	3	0	3	3
Bacteria	no rank	Bacteroidetes	Flavobacteriia	Flavobacteriales	Flavobacteriaceae	Ichthyenterobacterium	1	0	0	1	0	1	1
Bacteria	no rank	Bacteroidetes	Flavobacteriia	Flavobacteriales	Flavobacteriaceae	Imtechella	1	0	0	1	0	1	1
Bacteria	no rank	Bacteroidetes	Flavobacteriia	Flavobacteriales	Flavobacteriaceae	Jejuia	4	0	0	4	1	5	5
Bacteria	no rank	Bacteroidetes	Flavobacteriia	Flavobacteriales	Flavobacteriaceae	Joostella	1	0	0	1	0	1	1
Bacteria	no rank	Bacteroidetes	Flavobacteriia	Flavobacteriales	Flavobacteriaceae	Kordia	6	1	1	6	2	9	9
Bacteria	no rank	Bacteroidetes	Flavobacteriia	Flavobacteriales	Flavobacteriaceae	Kriegella	1	0	0	1	0	1	1
Bacteria	no rank	Bacteroidetes	Flavobacteriia	Flavobacteriales	Flavobacteriaceae	Lacinutrix	11	0	0	10	2	14	13
Bacteria	no rank	Bacteroidetes	Flavobacteriia	Flavobacteriales	Flavobacteriaceae	Leeuwenhoekiella	12	0	0	11	3	14	14
Bacteria	no rank	Bacteroidetes	Flavobacteriia	Flavobacteriales	Flavobacteriaceae	Lutibacter	15	0	0	15	2	17	17
Bacteria	no rank	Bacteroidetes	Flavobacteriia	Flavobacteriales	Flavobacteriaceae	Mangrovimonas	6	0	0	6	0	6	6
Bacteria	no rank	Bacteroidetes	Flavobacteriia	Flavobacteriales	Flavobacteriaceae	Maribacter	32	0	0	32	4	37	37
Bacteria	no rank	Bacteroidetes	Flavobacteriia	Flavobacteriales	Flavobacteriaceae	Mariniflexile	2	1	1	2	1	5	5
Bacteria	no rank	Bacteroidetes	Flavobacteriia	Flavobacteriales	Flavobacteriaceae	Marinirhabdus	1	0	0	1	1	2	2
Bacteria	no rank	Bacteroidetes	Flavobacteriia	Flavobacteriales	Flavobacteriaceae	Maripseudobacter	1	0	0	1	0	1	1
Bacteria	no rank	Bacteroidetes	Flavobacteriia	Flavobacteriales	Flavobacteriaceae	Marixanthomonas	2	0	0	2	0	2	2
Bacteria	no rank	Bacteroidetes	Flavobacteriia	Flavobacteriales	Flavobacteriaceae	Meridianimaribacter	2	0	0	2	0	2	2
Bacteria	no rank	Bacteroidetes	Flavobacteriia	Flavobacteriales	Flavobacteriaceae	Mesoflavibacter	5	0	0	5	2	7	7
Bacteria	no rank	Bacteroidetes	Flavobacteriia	Flavobacteriales	Flavobacteriaceae	Mesonia	7	0	0	7	2	9	9
Bacteria	no rank	Bacteroidetes	Flavobacteriia	Flavobacteriales	Flavobacteriaceae	Muricauda	29	0	0	29	8	40	40
Bacteria	no rank	Bacteroidetes	Flavobacteriia	Flavobacteriales	Flavobacteriaceae	Muriicola	1	0	0	1	0	1	1
Bacteria	no rank	Bacteroidetes	Flavobacteriia	Flavobacteriales	Flavobacteriaceae	Myroides	4	0	0	0	4	4	4
Bacteria	no rank	Bacteroidetes	Flavobacteriia	Flavobacteriales	Flavobacteriaceae	Nonlabens	25	0	1	23	6	31	31
Bacteria	no rank	Bacteroidetes	Flavobacteriia	Flavobacteriales	Flavobacteriaceae	Oceanihabitans	2	0	0	2	0	2	2
Bacteria	no rank	Bacteroidetes	Flavobacteriia	Flavobacteriales	Flavobacteriaceae	Ochrovirga	1	0	0	1	0	1	1
Bacteria	no rank	Bacteroidetes	Flavobacteriia	Flavobacteriales	Flavobacteriaceae	Olleya	10	0	0	10	3	13	13
Bacteria	no rank	Bacteroidetes	Flavobacteriia	Flavobacteriales	Flavobacteriaceae	Polaribacter	37	0	0	37	9	47	47
Bacteria	no rank	Bacteroidetes	Flavobacteriia	Flavobacteriales	Flavobacteriaceae	Pricia	1	0	0	1	0	1	1
Bacteria	no rank	Bacteroidetes	Flavobacteriia	Flavobacteriales	Flavobacteriaceae	Pseudozobellia	1	0	0	1	0	1	1
Bacteria	no rank	Bacteroidetes	Flavobacteriia	Flavobacteriales	Flavobacteriaceae	Psychroflexus	11	0	0	11	1	12	12
Bacteria	no rank	Bacteroidetes	Flavobacteriia	Flavobacteriales	Flavobacteriaceae	Psychroserpens	7	0	0	7	1	8	8
Bacteria	no rank	Bacteroidetes	Flavobacteriia	Flavobacteriales	Flavobacteriaceae	Pustulibacterium	1	0	0	1	0	1	1
Bacteria	no rank	Bacteroidetes	Flavobacteriia	Flavobacteriales	Flavobacteriaceae	Riemerella	3	0	0	0	3	3	3
Bacteria	no rank	Bacteroidetes	Flavobacteriia	Flavobacteriales	Flavobacteriaceae	Robertkochia	3	0	0	3	0	3	3
Bacteria	no rank	Bacteroidetes	Flavobacteriia	Flavobacteriales	Flavobacteriaceae	Robiginitalea	3	0	0	3	0	3	3
Bacteria	no rank	Bacteroidetes	Flavobacteriia	Flavobacteriales	Flavobacteriaceae	Salegentibacter	18	0	0	18	4	22	22
Bacteria	no rank	Bacteroidetes	Flavobacteriia	Flavobacteriales	Flavobacteriaceae	Salinimicrobium	5	0	0	5	0	5	5
Bacteria	no rank	Bacteroidetes	Flavobacteriia	Flavobacteriales	Flavobacteriaceae	Sediminibacter	1	0	0	1	1	2	2
Bacteria	no rank	Bacteroidetes	Flavobacteriia	Flavobacteriales	Flavobacteriaceae	Sediminicola	2	0	0	2	0	2	2
Bacteria	no rank	Bacteroidetes	Flavobacteriia	Flavobacteriales	Flavobacteriaceae	Seonamhaeicola	6	0	0	6	0	6	6
Bacteria	no rank	Bacteroidetes	Flavobacteriia	Flavobacteriales	Flavobacteriaceae	Siansivirga	1	0	0	1	0	1	1
Bacteria	no rank	Bacteroidetes	Flavobacteriia	Flavobacteriales	Flavobacteriaceae	Sinomicrobium	3	0	0	3	2	5	5
Bacteria	no rank	Bacteroidetes	Flavobacteriia	Flavobacteriales	Flavobacteriaceae	Soonwooa	1	0	0	0	1	1	1
Bacteria	no rank	Bacteroidetes	Flavobacteriia	Flavobacteriales	Flavobacteriaceae	Subsaximicrobium	3	0	0	3	0	3	3
Bacteria	no rank	Bacteroidetes	Flavobacteriia	Flavobacteriales	Flavobacteriaceae	Tamlana	5	0	0	5	0	5	5
Bacteria	no rank	Bacteroidetes	Flavobacteriia	Flavobacteriales	Flavobacteriaceae	Tenacibaculum	37	2	2	37	8	51	51
Bacteria	no rank	Bacteroidetes	Flavobacteriia	Flavobacteriales	Flavobacteriaceae	Ulvibacter	5	0	0	5	0	5	5
Bacteria	no rank	Bacteroidetes	Flavobacteriia	Flavobacteriales	Flavobacteriaceae	Ulvibacterium	1	0	0	1	0	1	1
Bacteria	no rank	Bacteroidetes	Flavobacteriia	Flavobacteriales	Flavobacteriaceae	Wenyingzhuangia	2	0	0	2	1	4	4
Bacteria	no rank	Bacteroidetes	Flavobacteriia	Flavobacteriales	Flavobacteriaceae	Winogradskyella	20	0	0	20	3	24	24
Bacteria	no rank	Bacteroidetes	Flavobacteriia	Flavobacteriales	Flavobacteriaceae	Xanthomarina	1	0	0	1	0	1	1
Bacteria	no rank	Bacteroidetes	Flavobacteriia	Flavobacteriales	Flavobacteriaceae	Zeaxanthinibacter	1	0	0	1	0	1	1
Bacteria	no rank	Bacteroidetes	Flavobacteriia	Flavobacteriales	Flavobacteriaceae	Zhouia	2	0	0	2	0	2	2
Bacteria	no rank	Bacteroidetes	Flavobacteriia	Flavobacteriales	Flavobacteriaceae	Zobellia	5	0	0	5	1	6	6
Bacteria	no rank	Bacteroidetes	Flavobacteriia	Flavobacteriales	Flavobacteriaceae	Zunongwangia	3	0	0	3	1	4	4
Bacteria	no rank	Bacteroidetes	Flavobacteriia	Flavobacteriales	Flavobacteriaceae	no rank	44	0	2	40	6	50	50
Bacteria	no rank	Bacteroidetes	Flavobacteriia	Flavobacteriales	Ichthyobacteriaceae	Ichthyobacterium	1	0	0	1	1	2	2
Bacteria	no rank	Bacteroidetes	Flavobacteriia	Flavobacteriales	Schleiferiaceae	Schleiferia	3	0	0	3	0	3	3
Bacteria	no rank	Bacteroidetes	Flavobacteriia	Flavobacteriales	Schleiferiaceae	Thermaurantimonas	1	0	0	1	0	1	1
Bacteria	no rank	Bacteroidetes	Flavobacteriia	Flavobacteriales	no rank	no rank	27	0	2	25	2	29	29
Bacteria	no rank	Bacteroidetes	Flavobacteriia	no rank	no rank	no rank	5	1	1	5	0	6	6
Bacteria	no rank	Bacteroidetes	Saprospiria	Saprospirales	Haliscomenobacteraceae	Haliscomenobacter	1	0	0	1	1	3	3
Bacteria	no rank	Bacteroidetes	Saprospiria	Saprospirales	Haliscomenobacteraceae	Phaeodactylibacter	2	0	0	2	0	2	2
Bacteria	no rank	Bacteroidetes	Saprospiria	Saprospirales	Lewinellaceae	Lewinella	11	0	0	11	4	15	15
Bacteria	no rank	Bacteroidetes	Saprospiria	Saprospirales	Lewinellaceae	no rank	1	0	0	1	0	1	1
Bacteria	no rank	Bacteroidetes	Saprospiria	Saprospirales	Saprospiraceae	Aureispira	1	0	0	1	1	3	3
Bacteria	no rank	Bacteroidetes	Saprospiria	Saprospirales	Saprospiraceae	Saprospira	2	0	0	2	0	2	2
Bacteria	no rank	Bacteroidetes	Saprospiria	Saprospirales	Saprospiraceae	no rank	1	0	0	1	0	1	1
Bacteria	no rank	Bacteroidetes	Saprospiria	Saprospirales	no rank	no rank	1	1	1	1	0	3	3
Bacteria	no rank	Bacteroidetes	Sphingobacteriia	Sphingobacteriales	Sphingobacteriaceae	Anseongella	2	2	2	2	2	6	6
Bacteria	no rank	Bacteroidetes	Sphingobacteriia	Sphingobacteriales	Sphingobacteriaceae	Arcticibacter	3	0	0	3	0	3	3
Bacteria	no rank	Bacteroidetes	Sphingobacteriia	Sphingobacteriales	Sphingobacteriaceae	Mucilaginibacter	48	6	6	48	16	72	72
Bacteria	no rank	Bacteroidetes	Sphingobacteriia	Sphingobacteriales	Sphingobacteriaceae	Nubsella	1	0	0	1	0	1	1
Bacteria	no rank	Bacteroidetes	Sphingobacteriia	Sphingobacteriales	Sphingobacteriaceae	Olivibacter	4	0	0	4	3	7	7
Bacteria	no rank	Bacteroidetes	Sphingobacteriia	Sphingobacteriales	Sphingobacteriaceae	Parapedobacter	6	0	0	6	2	8	8
Bacteria	no rank	Bacteroidetes	Sphingobacteriia	Sphingobacteriales	Sphingobacteriaceae	Pedobacter	116	4	5	115	23	154	154
Bacteria	no rank	Bacteroidetes	Sphingobacteriia	Sphingobacteriales	Sphingobacteriaceae	Pelobium	1	0	0	1	1	2	2
Bacteria	no rank	Bacteroidetes	Sphingobacteriia	Sphingobacteriales	Sphingobacteriaceae	Pseudopedobacter	2	0	1	1	0	2	2
Bacteria	no rank	Bacteroidetes	Sphingobacteriia	Sphingobacteriales	Sphingobacteriaceae	Pseudosphingobacterium	1	0	0	1	0	1	1
Bacteria	no rank	Bacteroidetes	Sphingobacteriia	Sphingobacteriales	Sphingobacteriaceae	Solitalea	3	0	0	3	0	3	3
Bacteria	no rank	Bacteroidetes	Sphingobacteriia	Sphingobacteriales	Sphingobacteriaceae	Sphingobacterium	57	1	1	57	13	74	74
Bacteria	no rank	Bacteroidetes	Sphingobacteriia	Sphingobacteriales	Sphingobacteriaceae	no rank	7	0	0	6	1	8	8
Bacteria	no rank	Bacteroidetes	Sphingobacteriia	Sphingobacteriales	no rank	no rank	21	1	5	11	7	33	33
Bacteria	no rank	Bacteroidetes	no rank	Bacteroidetes Order II. Incertae sedis	Rhodothermaceae	Longibacter	1	0	0	1	0	1	1
Bacteria	no rank	Bacteroidetes	no rank	Bacteroidetes Order II. Incertae sedis	Rhodothermaceae	Longimonas	1	0	0	1	0	1	1
Bacteria	no rank	Bacteroidetes	no rank	Bacteroidetes Order II. Incertae sedis	Rhodothermaceae	Rhodothermus	4	4	4	4	2	10	10
Bacteria	no rank	Bacteroidetes	no rank	Bacteroidetes Order II. Incertae sedis	Rhodothermaceae	Salinibacter	14	6	6	14	0	22	22
Bacteria	no rank	Bacteroidetes	no rank	Bacteroidetes Order II. Incertae sedis	Rhodothermaceae	Salisaeta	1	0	0	1	0	1	1
Bacteria	no rank	Bacteroidetes	no rank	Bacteroidetes Order II. Incertae sedis	Rhodothermaceae	no rank	3	0	0	3	1	4	4
Bacteria	no rank	Bacteroidetes	no rank	no rank	no rank	no rank	177	11	21	158	23	227	227
Bacteria	no rank	Balneolaeota	Balneolia	Balneolales	Balneolaceae	Aliifodinibius	4	0	0	4	2	8	8
Bacteria	no rank	Balneolaeota	Balneolia	Balneolales	Balneolaceae	Balneola	3	0	0	3	0	3	3
Bacteria	no rank	Balneolaeota	Balneolia	Balneolales	Balneolaceae	Gracilimonas	4	1	1	4	2	7	7
Bacteria	no rank	Balneolaeota	Balneolia	Balneolales	Balneolaceae	Rhodohalobacter	3	0	0	3	1	5	5
Bacteria	no rank	Balneolaeota	Balneolia	Balneolales	Balneolaceae	no rank	6	0	0	6	0	6	6
Bacteria	no rank	Balneolaeota	no rank	no rank	no rank	Candidatus Cyclonatronum	1	0	0	1	0	1	1
Bacteria	no rank	Caldiserica	Caldisericia	Caldisericales	Caldisericaceae	Caldisericum	4	4	4	4	0	19	19
Bacteria	no rank	Caldiserica	no rank	no rank	no rank	no rank	6	4	6	4	0	20	20
Bacteria	no rank	Calditrichaeota	Calditrichae	Calditrichales	Calditrichaceae	Caldithrix	7	5	7	5	0	44	44
Bacteria	no rank	Calditrichaeota	Calditrichae	Calditrichales	no rank	no rank	1	1	1	1	0	13	13
Bacteria	no rank	Calditrichaeota	no rank	no rank	no rank	no rank	10	8	10	8	0	63	63
Bacteria	no rank	Candidatus Abawacabacteria	no rank	no rank	no rank	no rank	2	0	2	0	0	2	2
Bacteria	no rank	Candidatus Abyssubacteria	no rank	no rank	no rank	no rank	2	2	2	2	0	19	19
Bacteria	no rank	Candidatus Aerophobetes	no rank	no rank	no rank	no rank	16	10	11	15	0	39	39
Bacteria	no rank	Candidatus Amesbacteria	no rank	no rank	no rank	no rank	7	1	3	5	0	8	8
Bacteria	no rank	Candidatus Aminicenantes	no rank	no rank	no rank	Candidatus Saccharicenans	1	1	1	1	0	11	11
Bacteria	no rank	Candidatus Aminicenantes	no rank	no rank	no rank	no rank	24	17	23	18	0	119	119
Bacteria	no rank	Candidatus Atribacteria	no rank	no rank	no rank	no rank	18	11	18	11	1	100	100
Bacteria	no rank	Candidatus Aureabacteria	no rank	no rank	no rank	no rank	1	1	1	1	0	10	10
Bacteria	no rank	Candidatus Azambacteria	no rank	no rank	no rank	no rank	6	0	6	0	0	6	6
Bacteria	no rank	Candidatus Beckwithbacteria	no rank	no rank	no rank	no rank	3	0	3	0	0	3	3
Bacteria	no rank	Candidatus Berkelbacteria	no rank	no rank	no rank	no rank	20	3	6	16	2	24	24
Bacteria	no rank	Candidatus Bipolaricaulota	no rank	no rank	no rank	Candidatus Bipolaricaulis	2	2	2	2	0	9	9
Bacteria	no rank	Candidatus Bipolaricaulota	no rank	no rank	no rank	no rank	7	2	6	3	0	28	28
Bacteria	no rank	Candidatus Brennerbacteria	no rank	no rank	no rank	no rank	3	0	2	1	0	4	4
Bacteria	no rank	Candidatus Campbellbacteria	no rank	no rank	no rank	no rank	2	0	1	0	1	2	2
Bacteria	no rank	Candidatus Cloacimonetes	no rank	no rank	no rank	Candidatus Cloacimonas	6	6	6	6	1	27	27
Bacteria	no rank	Candidatus Cloacimonetes	no rank	no rank	no rank	Candidatus Syntrophosphaera	1	1	1	1	0	2	2
Bacteria	no rank	Candidatus Cloacimonetes	no rank	no rank	no rank	no rank	14	9	14	9	0	82	82
Bacteria	no rank	Candidatus Coatesbacteria	no rank	no rank	no rank	no rank	5	3	5	3	0	12	12
Bacteria	no rank	Candidatus Collierbacteria	no rank	no rank	no rank	no rank	6	0	6	0	0	6	6
Bacteria	no rank	Candidatus Colwellbacteria	no rank	no rank	no rank	no rank	1	0	1	0	0	1	1
Bacteria	no rank	Candidatus Cryosericota	Candidatus Cryosericia	Candidatus Cryosericales	Candidatus Cryosericaceae	Candidatus Cryosericum	7	7	7	7	2	37	37
Bacteria	no rank	Candidatus Curtissbacteria	no rank	no rank	no rank	no rank	6	0	6	0	0	6	6
Bacteria	no rank	Candidatus Dadabacteria	no rank	no rank	no rank	no rank	9	6	6	9	0	47	47
Bacteria	no rank	Candidatus Daviesbacteria	no rank	no rank	no rank	no rank	9	1	7	1	2	10	10
Bacteria	no rank	Candidatus Delongbacteria	no rank	no rank	no rank	no rank	1	1	1	1	0	3	3
Bacteria	no rank	Candidatus Desantisbacteria	no rank	no rank	no rank	no rank	11	1	11	1	0	37	37
Bacteria	no rank	Candidatus Dormibacteraeota	no rank	no rank	no rank	Candidatus Dormibacter	1	1	1	1	0	19	19
Bacteria	no rank	Candidatus Dormibacteraeota	no rank	no rank	no rank	no rank	2	2	2	2	0	16	16
Bacteria	no rank	Candidatus Doudnabacteria	no rank	no rank	no rank	no rank	7	0	7	0	0	8	8
Bacteria	no rank	Candidatus Edwardsbacteria	no rank	no rank	no rank	no rank	3	1	3	1	0	16	16
Bacteria	no rank	Candidatus Eisenbacteria	no rank	no rank	no rank	no rank	12	11	12	11	0	69	69
Bacteria	no rank	Candidatus Eremiobacteraeota	no rank	Candidatus Eremiobacterales	no rank	Candidatus Eremiobacter	1	1	1	1	0	11	11
Bacteria	no rank	Candidatus Eremiobacteraeota	no rank	no rank	no rank	no rank	1	1	1	1	0	2	2
Bacteria	no rank	Candidatus Falkowbacteria	no rank	no rank	no rank	no rank	9	0	9	0	0	9	9
Bacteria	no rank	Candidatus Fermentibacteria	Candidatus Fermentibacteria (class)	Candidatus Fermentibacterales	Candidatus Fermentibacteraceae	Candidatus Fermentibacter	3	1	3	1	0	7	7
Bacteria	no rank	Candidatus Fermentibacteria	no rank	no rank	no rank	no rank	3	3	3	3	0	29	29
Bacteria	no rank	Candidatus Firestonebacteria	no rank	no rank	no rank	no rank	3	2	3	2	1	30	30
Bacteria	no rank	Candidatus Fischerbacteria	no rank	no rank	no rank	no rank	1	1	1	1	0	11	11
Bacteria	no rank	Candidatus Fraserbacteria	no rank	no rank	no rank	no rank	1	1	1	1	1	4	4
Bacteria	no rank	Candidatus Giovannonibacteria	no rank	no rank	no rank	no rank	6	0	1	5	0	6	6
Bacteria	no rank	Candidatus Glassbacteria	no rank	no rank	no rank	no rank	3	2	3	2	0	9	9
Bacteria	no rank	Candidatus Goldbacteria	no rank	no rank	no rank	no rank	1	1	1	1	0	14	14
Bacteria	no rank	Candidatus Gottesmanbacteria	no rank	no rank	no rank	no rank	9	0	9	0	0	10	10
Bacteria	no rank	Candidatus Gracilibacteria	no rank	no rank	no rank	no rank	8	0	6	0	2	15	15
Bacteria	no rank	Candidatus Handelsmanbacteria	no rank	no rank	no rank	no rank	1	1	1	1	0	6	6
Bacteria	no rank	Candidatus Harrisonbacteria	no rank	no rank	no rank	no rank	2	0	2	0	0	2	2
Bacteria	no rank	Candidatus Hydrogenedentes	no rank	no rank	no rank	no rank	6	6	6	6	0	67	67
Bacteria	no rank	Candidatus Hydrothermae	no rank	no rank	no rank	no rank	4	2	4	2	0	28	28
Bacteria	no rank	Candidatus Jorgensenbacteria	no rank	no rank	no rank	no rank	7	1	5	3	0	8	8
Bacteria	no rank	Candidatus Kaiserbacteria	no rank	no rank	no rank	no rank	16	0	14	0	2	17	17
Bacteria	no rank	Candidatus Kapabacteria	no rank	no rank	no rank	no rank	2	2	2	2	0	4	4
Bacteria	no rank	Candidatus Kerfeldbacteria	no rank	no rank	no rank	no rank	3	0	3	0	0	3	3
Bacteria	no rank	Candidatus Komeilibacteria	no rank	no rank	no rank	no rank	1	0	1	0	0	1	1
Bacteria	no rank	Candidatus Kryptonia	no rank	no rank	no rank	Candidatus Chrysopegis	1	0	0	1	0	1	1
Bacteria	no rank	Candidatus Kryptonia	no rank	no rank	no rank	Candidatus Kryptobacter	4	0	2	2	0	4	4
Bacteria	no rank	Candidatus Kryptonia	no rank	no rank	no rank	Candidatus Kryptonium	7	6	7	6	0	13	13
Bacteria	no rank	Candidatus Kryptonia	no rank	no rank	no rank	Candidatus Thermokryptus	1	1	1	1	0	2	2
Bacteria	no rank	Candidatus Kuenenbacteria	no rank	no rank	no rank	no rank	2	0	1	0	1	2	2
Bacteria	no rank	Candidatus Latescibacteria	no rank	no rank	no rank	no rank	12	7	9	10	1	26	26
Bacteria	no rank	Candidatus Levybacteria	no rank	no rank	no rank	no rank	14	0	14	0	0	14	14
Bacteria	no rank	Candidatus Lindowbacteria	no rank	no rank	no rank	no rank	2	1	2	1	0	14	14
Bacteria	no rank	Candidatus Liptonbacteria	no rank	no rank	no rank	no rank	4	0	3	1	0	4	4
Bacteria	no rank	Candidatus Lloydbacteria	no rank	no rank	no rank	no rank	6	0	5	0	1	6	6
Bacteria	no rank	Candidatus Magasanikbacteria	no rank	no rank	no rank	no rank	20	0	19	0	3	22	22
Bacteria	no rank	Candidatus Margulisbacteria	Candidatus Riflemargulisbacteria	no rank	no rank	no rank	2	2	2	2	1	10	10
Bacteria	no rank	Candidatus Margulisbacteria	Candidatus Termititenacia	Candidatus Termititenacales	Candidatus Termititenacaceae	Candidatus Termititenax	3	0	0	3	1	4	4
Bacteria	no rank	Candidatus Margulisbacteria	no rank	no rank	no rank	no rank	1	0	1	0	1	2	2
Bacteria	no rank	Candidatus Marinimicrobia	no rank	no rank	no rank	no rank	32	22	30	24	0	71	71
Bacteria	no rank	Candidatus Melainabacteria	no rank	Candidatus Gastranaerophilales	no rank	no rank	25	8	25	8	1	89	89
Bacteria	no rank	Candidatus Melainabacteria	no rank	no rank	no rank	no rank	20	14	20	14	2	200	200
Bacteria	no rank	Candidatus Microgenomates	no rank	no rank	no rank	no rank	3	0	1	0	2	3	3
Bacteria	no rank	Candidatus Moranbacteria	no rank	no rank	no rank	no rank	16	0	15	0	2	17	17
Bacteria	no rank	Candidatus Nealsonbacteria	no rank	no rank	no rank	no rank	4	0	3	1	1	7	7
Bacteria	no rank	Candidatus Niyogibacteria	no rank	no rank	no rank	no rank	2	0	0	2	0	2	2
Bacteria	no rank	Candidatus Nomurabacteria	no rank	no rank	no rank	no rank	18	0	18	0	0	18	18
Bacteria	no rank	Candidatus Omnitrophica	no rank	no rank	no rank	no rank	115	64	115	64	1	640	640
Bacteria	no rank	Candidatus Pacebacteria	no rank	no rank	no rank	no rank	8	0	7	0	1	8	8
Bacteria	no rank	Candidatus Parcubacteria	no rank	no rank	no rank	no rank	13	2	12	3	0	19	19
Bacteria	no rank	Candidatus Peregrinibacteria	Candidatus Peribacteria	no rank	no rank	no rank	4	0	1	0	3	4	4
Bacteria	no rank	Candidatus Peregrinibacteria	no rank	no rank	no rank	no rank	20	0	12	5	4	22	22
Bacteria	no rank	Candidatus Poribacteria	no rank	no rank	no rank	no rank	9	1	1	8	4	18	18
Bacteria	no rank	Candidatus Portnoybacteria	no rank	no rank	no rank	no rank	4	1	2	3	0	5	5
Bacteria	no rank	Candidatus Raymondbacteria	no rank	no rank	no rank	no rank	4	0	3	1	0	15	15
Bacteria	no rank	Candidatus Riflebacteria	Candidatus Ozemobacteria	no rank	Candidatus Ozemobacteraceae	Candidatus Ozemobacter	1	1	1	1	0	20	20
Bacteria	no rank	Candidatus Riflebacteria	no rank	no rank	no rank	no rank	4	2	4	2	0	56	56
Bacteria	no rank	Candidatus Roizmanbacteria	no rank	no rank	no rank	no rank	16	0	10	0	6	16	16
Bacteria	no rank	Candidatus Rokubacteria	no rank	no rank	no rank	no rank	83	34	81	36	1	384	384
Bacteria	no rank	Candidatus Ryanbacteria	no rank	no rank	no rank	no rank	3	0	0	2	1	3	3
Bacteria	no rank	Candidatus Saccharibacteria	no rank	no rank	no rank	Candidatus Saccharimonas	1	0	0	0	1	1	1
Bacteria	no rank	Candidatus Saccharibacteria	no rank	no rank	no rank	no rank	17	0	12	0	5	18	18
Bacteria	no rank	Candidatus Schekmanbacteria	no rank	no rank	no rank	no rank	6	3	6	3	0	36	36
Bacteria	no rank	Candidatus Shapirobacteria	no rank	no rank	no rank	no rank	10	0	10	0	0	10	10
Bacteria	no rank	Candidatus Spechtbacteria	no rank	no rank	no rank	no rank	1	0	0	1	0	1	1
Bacteria	no rank	Candidatus Staskawiczbacteria	no rank	no rank	no rank	no rank	1	0	1	0	0	1	1
Bacteria	no rank	Candidatus Sumerlaeota	no rank	no rank	no rank	no rank	2	1	1	2	0	9	9
Bacteria	no rank	Candidatus Sungbacteria	no rank	no rank	no rank	no rank	1	0	1	0	0	1	1
Bacteria	no rank	Candidatus Tagabacteria	no rank	no rank	no rank	no rank	5	0	0	5	0	5	5
Bacteria	no rank	Candidatus Taylorbacteria	no rank	no rank	no rank	no rank	1	0	0	0	1	1	1
Bacteria	no rank	Candidatus Tectomicrobia	no rank	no rank	no rank	Candidatus Entotheonella	4	2	4	2	0	26	18
Bacteria	no rank	Candidatus Tectomicrobia	no rank	no rank	no rank	no rank	2	2	2	2	0	12	12
Bacteria	no rank	Candidatus Terrybacteria	no rank	no rank	no rank	no rank	3	0	2	1	0	3	3
Bacteria	no rank	Candidatus Uhrbacteria	no rank	no rank	no rank	no rank	14	0	12	0	2	17	17
Bacteria	no rank	Candidatus Vogelbacteria	no rank	no rank	no rank	no rank	1	0	0	0	1	1	1
Bacteria	no rank	Candidatus Wallbacteria	no rank	no rank	no rank	no rank	2	1	2	1	0	32	32
Bacteria	no rank	Candidatus Wirthbacteria	no rank	no rank	no rank	no rank	1	0	1	0	0	1	1
Bacteria	no rank	Candidatus Woesebacteria	no rank	no rank	no rank	no rank	19	0	15	0	5	24	24
Bacteria	no rank	Candidatus Wolfebacteria	no rank	no rank	no rank	no rank	8	3	8	3	1	12	12
Bacteria	no rank	Candidatus Yanofskybacteria	no rank	no rank	no rank	no rank	8	0	8	0	0	8	8
Bacteria	no rank	Candidatus Yonathbacteria	no rank	no rank	no rank	no rank	6	0	6	0	0	7	7
Bacteria	no rank	Candidatus Zambryskibacteria	no rank	no rank	no rank	no rank	14	0	13	1	1	17	17
Bacteria	no rank	Chlamydiae	Chlamydiia	Chlamydiales	Chlamydiaceae	Chlamydia	364	0	0	364	0	364	364
Bacteria	no rank	Chlamydiae	Chlamydiia	Chlamydiales	no rank	no rank	4	1	1	4	0	5	5
Bacteria	no rank	Chlamydiae	Chlamydiia	Parachlamydiales	Candidatus Parilichlamydiaceae	Candidatus Similichlamydia	1	0	0	1	0	1	1
Bacteria	no rank	Chlamydiae	Chlamydiia	Parachlamydiales	Criblamydiaceae	Criblamydia	1	0	0	1	0	1	1
Bacteria	no rank	Chlamydiae	Chlamydiia	Parachlamydiales	Criblamydiaceae	Estrella	1	0	0	1	1	2	2
Bacteria	no rank	Chlamydiae	Chlamydiia	Parachlamydiales	Parachlamydiaceae	Candidatus Protochlamydia	6	0	0	6	0	6	6
Bacteria	no rank	Chlamydiae	Chlamydiia	Parachlamydiales	Parachlamydiaceae	Neochlamydia	3	0	0	3	0	3	3
Bacteria	no rank	Chlamydiae	Chlamydiia	Parachlamydiales	Parachlamydiaceae	Parachlamydia	6	1	1	6	1	9	9
Bacteria	no rank	Chlamydiae	Chlamydiia	Parachlamydiales	Parachlamydiaceae	no rank	1	0	0	1	0	1	1
Bacteria	no rank	Chlamydiae	Chlamydiia	Parachlamydiales	Rhabdochlamydiaceae	Candidatus Rhabdochlamydia	1	0	0	1	0	1	1
Bacteria	no rank	Chlamydiae	Chlamydiia	Parachlamydiales	Simkaniaceae	Simkania	1	1	1	1	0	2	2
Bacteria	no rank	Chlamydiae	Chlamydiia	Parachlamydiales	Waddliaceae	Waddlia	2	0	0	2	0	2	2
Bacteria	no rank	Chlamydiae	no rank	no rank	no rank	no rank	8	4	4	8	0	13	13
Bacteria	no rank	Chlorobi	Chlorobia	Chlorobiales	Candidatus Thermochlorobacteriaceae	Candidatus Thermochlorobacter	1	1	1	1	0	11	11
Bacteria	no rank	Chlorobi	Chlorobia	Chlorobiales	Candidatus Thermochlorobacteriaceae	no rank	1	1	1	1	0	5	5
Bacteria	no rank	Chlorobi	Chlorobia	Chlorobiales	Chlorobiaceae	Chlorobaculum	4	0	4	0	0	4	4
Bacteria	no rank	Chlorobi	Chlorobia	Chlorobiales	Chlorobiaceae	Chlorobium	19	1	19	1	2	36	36
Bacteria	no rank	Chlorobi	Chlorobia	Chlorobiales	Chlorobiaceae	Chloroherpeton	1	1	1	1	0	9	9
Bacteria	no rank	Chlorobi	Chlorobia	Chlorobiales	Chlorobiaceae	Pelodictyon	3	0	3	0	0	3	3
Bacteria	no rank	Chlorobi	Chlorobia	Chlorobiales	Chlorobiaceae	Prosthecochloris	7	0	7	0	0	7	7
Bacteria	no rank	Chlorobi	no rank	no rank	no rank	no rank	6	4	4	6	0	10	10
Bacteria	no rank	Chloroflexi	Anaerolineae	Anaerolineales	Anaerolineaceae	Anaerolinea	5	4	5	4	0	51	51
Bacteria	no rank	Chloroflexi	Anaerolineae	Anaerolineales	Anaerolineaceae	Bellilinea	2	2	2	2	0	30	30
Bacteria	no rank	Chloroflexi	Anaerolineae	Anaerolineales	Anaerolineaceae	Brevefilum	1	0	0	1	0	1	1
Bacteria	no rank	Chloroflexi	Anaerolineae	Anaerolineales	Anaerolineaceae	Flexilinea	1	1	1	1	1	24	24
Bacteria	no rank	Chloroflexi	Anaerolineae	Anaerolineales	Anaerolineaceae	Leptolinea	2	2	2	2	0	50	50
Bacteria	no rank	Chloroflexi	Anaerolineae	Anaerolineales	Anaerolineaceae	Levilinea	2	2	2	2	0	40	40
Bacteria	no rank	Chloroflexi	Anaerolineae	Anaerolineales	Anaerolineaceae	Longilinea	1	1	1	1	0	15	15
Bacteria	no rank	Chloroflexi	Anaerolineae	Anaerolineales	Anaerolineaceae	Ornatilinea	1	0	1	0	0	23	23
Bacteria	no rank	Chloroflexi	Anaerolineae	Anaerolineales	Anaerolineaceae	Pelolinea	2	2	2	2	2	42	42
Bacteria	no rank	Chloroflexi	Anaerolineae	Anaerolineales	Anaerolineaceae	Thermanaerothrix	1	1	1	1	0	10	10
Bacteria	no rank	Chloroflexi	Anaerolineae	Anaerolineales	Anaerolineaceae	no rank	14	10	12	12	4	105	105
Bacteria	no rank	Chloroflexi	Anaerolineae	Anaerolineales	no rank	no rank	10	9	10	9	0	40	40
Bacteria	no rank	Chloroflexi	Anaerolineae	no rank	no rank	no rank	28	18	24	22	2	189	189
Bacteria	no rank	Chloroflexi	Ardenticatenia	Ardenticatenales	Ardenticatenaceae	Ardenticatena	2	2	2	2	0	27	27
Bacteria	no rank	Chloroflexi	Ardenticatenia	Ardenticatenales	Ardenticatenaceae	Candidatus Promineofilum	1	1	1	1	0	2	2
Bacteria	no rank	Chloroflexi	Ardenticatenia	no rank	no rank	no rank	2	2	2	2	0	18	18
Bacteria	no rank	Chloroflexi	Caldilineae	Caldilineales	Caldilineaceae	Caldilinea	1	1	1	1	0	2	2
Bacteria	no rank	Chloroflexi	Caldilineae	Caldilineales	Caldilineaceae	Litorilinea	2	1	2	1	0	6	6
Bacteria	no rank	Chloroflexi	Caldilineae	no rank	no rank	no rank	3	2	3	2	0	9	9
Bacteria	no rank	Chloroflexi	Candidatus Thermofonsia	no rank	no rank	no rank	10	8	10	8	0	45	45
Bacteria	no rank	Chloroflexi	Chloroflexia	Chloroflexales	Chloroflexaceae	Chloroflexus	7	7	7	7	0	109	109
Bacteria	no rank	Chloroflexi	Chloroflexia	Chloroflexales	Oscillochloridaceae	Candidatus Chloroploca	3	3	3	3	0	67	67
Bacteria	no rank	Chloroflexi	Chloroflexia	Chloroflexales	Oscillochloridaceae	Candidatus Viridilinea	2	2	2	2	0	28	28
Bacteria	no rank	Chloroflexi	Chloroflexia	Chloroflexales	Oscillochloridaceae	Oscillochloris	2	2	2	2	1	28	28
Bacteria	no rank	Chloroflexi	Chloroflexia	Chloroflexales	Roseiflexaceae	Kouleothrix	1	1	1	1	1	8	8
Bacteria	no rank	Chloroflexi	Chloroflexia	Chloroflexales	Roseiflexaceae	Roseiflexus	3	1	3	1	0	32	32
Bacteria	no rank	Chloroflexi	Chloroflexia	Chloroflexales	no rank	no rank	1	1	1	1	0	18	18
Bacteria	no rank	Chloroflexi	Chloroflexia	Herpetosiphonales	Herpetosiphonaceae	Herpetosiphon	3	3	3	3	2	44	44
Bacteria	no rank	Chloroflexi	Dehalococcoidia	Dehalococcoidales	Dehalococcoidaceae	Dehalococcoides	33	0	33	0	1	34	34
Bacteria	no rank	Chloroflexi	Dehalococcoidia	no rank	no rank	Dehalogenimonas	6	0	6	0	2	10	10
Bacteria	no rank	Chloroflexi	Dehalococcoidia	no rank	no rank	no rank	31	9	30	10	2	103	103
Bacteria	no rank	Chloroflexi	Ktedonobacteria	Ktedonobacterales	Dictyobacteraceae	Dictyobacter	3	0	3	0	0	13	13
Bacteria	no rank	Chloroflexi	Ktedonobacteria	Ktedonobacterales	Dictyobacteraceae	Tengunoibacter	1	0	1	0	0	4	4
Bacteria	no rank	Chloroflexi	Ktedonobacteria	Ktedonobacterales	Ktedonobacteraceae	Ktedonobacter	7	0	7	0	0	20	20
Bacteria	no rank	Chloroflexi	Ktedonobacteria	Ktedonobacterales	Thermosporotrichaceae	Thermosporothrix	2	0	2	0	0	10	10
Bacteria	no rank	Chloroflexi	Ktedonobacteria	Ktedonobacterales	no rank	no rank	1	0	1	0	0	7	7
Bacteria	no rank	Chloroflexi	Ktedonobacteria	Thermogemmatisporales	Thermogemmatisporaceae	Thermogemmatispora	3	0	3	0	0	11	11
Bacteria	no rank	Chloroflexi	Tepidiformia	no rank	no rank	no rank	1	1	1	1	1	13	13
Bacteria	no rank	Chloroflexi	Thermoflexia	Thermoflexales	Thermoflexaceae	Thermoflexus	2	2	2	2	0	16	16
Bacteria	no rank	Chloroflexi	Thermoflexia	no rank	no rank	no rank	1	1	1	1	0	2	2
Bacteria	no rank	Chloroflexi	Thermomicrobia	Sphaerobacterales	Sphaerobacteraceae	Nitrolancea	1	1	1	1	0	4	4
Bacteria	no rank	Chloroflexi	Thermomicrobia	Sphaerobacterales	Sphaerobacteraceae	Sphaerobacter	2	2	2	2	0	24	24
Bacteria	no rank	Chloroflexi	Thermomicrobia	Sphaerobacterales	Sphaerobacteraceae	no rank	1	1	1	1	0	18	18
Bacteria	no rank	Chloroflexi	Thermomicrobia	Thermomicrobiales	Thermomicrobiaceae	Thermomicrobium	1	1	1	1	0	7	7
Bacteria	no rank	Chloroflexi	Thermomicrobia	Thermomicrobiales	no rank	no rank	1	1	1	1	0	8	8
Bacteria	no rank	Chloroflexi	Thermomicrobia	no rank	no rank	Thermorudis	1	1	1	1	0	5	5
Bacteria	no rank	Chloroflexi	no rank	no rank	no rank	no rank	341	194	327	208	6	2828	2828
Bacteria	no rank	Chrysiogenetes	Chrysiogenetes	Chrysiogenales	Chrysiogenaceae	Chrysiogenes	1	1	1	1	0	29	29
Bacteria	no rank	Chrysiogenetes	Chrysiogenetes	Chrysiogenales	Chrysiogenaceae	Desulfurispirillum	1	1	1	1	1	21	21
Bacteria	no rank	Chrysiogenetes	Chrysiogenetes	Chrysiogenales	no rank	no rank	2	1	2	1	0	19	19
Bacteria	no rank	Coprothermobacterota	Coprothermobacteria	Coprothermobacterales	Coprothermobacteraceae	Coprothermobacter	4	4	4	4	0	14	14
Bacteria	no rank	Cyanobacteria	Gloeobacteria	Gloeobacterales	Gloeobacteraceae	Gloeobacter	2	2	2	2	0	9	9
Bacteria	no rank	Cyanobacteria	no rank	Chroococcales	Aphanothecaceae	Aphanothece	4	4	4	4	1	66	66
Bacteria	no rank	Cyanobacteria	no rank	Chroococcales	Aphanothecaceae	Candidatus Atelocyanobacterium	2	0	0	2	0	2	2
Bacteria	no rank	Cyanobacteria	no rank	Chroococcales	Aphanothecaceae	Crocosphaera	9	8	9	8	0	160	160
Bacteria	no rank	Cyanobacteria	no rank	Chroococcales	Aphanothecaceae	Euhalothece	2	2	2	2	0	21	21
Bacteria	no rank	Cyanobacteria	no rank	Chroococcales	Aphanothecaceae	Gloeothece	2	2	2	2	0	75	75
Bacteria	no rank	Cyanobacteria	no rank	Chroococcales	Aphanothecaceae	Halothece	1	1	1	1	0	18	18
Bacteria	no rank	Cyanobacteria	no rank	Chroococcales	Aphanothecaceae	Rippkaea	2	2	2	2	0	48	48
Bacteria	no rank	Cyanobacteria	no rank	Chroococcales	Aphanothecaceae	Rubidibacter	1	1	1	1	0	2	2
Bacteria	no rank	Cyanobacteria	no rank	Chroococcales	Chroococcaceae	Chondrocystis	1	1	1	1	0	21	21
Bacteria	no rank	Cyanobacteria	no rank	Chroococcales	Chroococcaceae	Chroogloeocystis	1	1	1	1	0	14	14
Bacteria	no rank	Cyanobacteria	no rank	Chroococcales	Chroococcaceae	Cyanosarcina	1	1	1	1	1	22	22
Bacteria	no rank	Cyanobacteria	no rank	Chroococcales	Chroococcaceae	Geminocystis	3	3	3	3	1	74	74
Bacteria	no rank	Cyanobacteria	no rank	Chroococcales	Chroococcaceae	Gloeocapsa	3	3	3	3	1	55	55
Bacteria	no rank	Cyanobacteria	no rank	Chroococcales	Chroococcaceae	Gloeocapsopsis	2	2	2	2	2	26	26
Bacteria	no rank	Cyanobacteria	no rank	Chroococcales	Cyanobacteriaceae	Cyanobacterium	6	5	6	5	1	101	101
Bacteria	no rank	Cyanobacteria	no rank	Chroococcales	Entophysalidaceae	Chlorogloea	1	1	1	1	0	15	15
Bacteria	no rank	Cyanobacteria	no rank	Chroococcales	Microcystaceae	Microcystis	71	45	60	56	3	150	150
Bacteria	no rank	Cyanobacteria	no rank	Chroococcales	no rank	no rank	2	2	2	2	0	22	22
Bacteria	no rank	Cyanobacteria	no rank	Chroococcidiopsidales	Chroococcidiopsidaceae	Aliterella	1	1	1	1	0	18	18
Bacteria	no rank	Cyanobacteria	no rank	Chroococcidiopsidales	Chroococcidiopsidaceae	Chroococcidiopsis	5	5	5	5	3	107	107
Bacteria	no rank	Cyanobacteria	no rank	Gloeoemargaritales	Gloeomargaritaceae	Gloeomargarita	1	1	1	1	0	11	11
Bacteria	no rank	Cyanobacteria	no rank	Nostocales	Aphanizomenonaceae	Anabaenopsis	1	1	1	1	0	17	17
Bacteria	no rank	Cyanobacteria	no rank	Nostocales	Aphanizomenonaceae	Aphanizomenon	4	2	4	2	0	6	6
Bacteria	no rank	Cyanobacteria	no rank	Nostocales	Aphanizomenonaceae	Cuspidothrix	1	1	1	1	0	3	3
Bacteria	no rank	Cyanobacteria	no rank	Nostocales	Aphanizomenonaceae	Cylindrospermopsis	21	19	21	19	0	40	40
Bacteria	no rank	Cyanobacteria	no rank	Nostocales	Aphanizomenonaceae	Dolichospermum	5	1	1	5	0	7	7
Bacteria	no rank	Cyanobacteria	no rank	Nostocales	Aphanizomenonaceae	Nodularia	6	6	6	6	1	42	42
Bacteria	no rank	Cyanobacteria	no rank	Nostocales	Aphanizomenonaceae	Raphidiopsis	2	2	2	2	0	4	4
Bacteria	no rank	Cyanobacteria	no rank	Nostocales	Aphanizomenonaceae	Sphaerospermopsis	2	0	0	2	0	2	2
Bacteria	no rank	Cyanobacteria	no rank	Nostocales	Calotrichaceae	Calothrix	17	17	17	17	5	259	259
Bacteria	no rank	Cyanobacteria	no rank	Nostocales	Chlorogloeopsidaceae	Chlorogloeopsis	3	3	3	3	0	51	51
Bacteria	no rank	Cyanobacteria	no rank	Nostocales	Fortieaceae	Aulosira	1	1	1	1	0	14	14
Bacteria	no rank	Cyanobacteria	no rank	Nostocales	Fortieaceae	Fortiea	1	1	1	1	1	11	11
Bacteria	no rank	Cyanobacteria	no rank	Nostocales	Hapalosiphonaceae	Fischerella	44	41	44	41	0	418	418
Bacteria	no rank	Cyanobacteria	no rank	Nostocales	Hapalosiphonaceae	Hapalosiphon	1	1	1	1	0	11	11
Bacteria	no rank	Cyanobacteria	no rank	Nostocales	Hapalosiphonaceae	Mastigocladus	1	1	1	1	0	9	9
Bacteria	no rank	Cyanobacteria	no rank	Nostocales	Hapalosiphonaceae	Mastigocoleus	1	1	1	1	0	14	9
Bacteria	no rank	Cyanobacteria	no rank	Nostocales	Hapalosiphonaceae	Westiellopsis	1	1	1	1	0	8	8
Bacteria	no rank	Cyanobacteria	no rank	Nostocales	Hapalosiphonaceae	no rank	1	1	1	1	1	9	9
Bacteria	no rank	Cyanobacteria	no rank	Nostocales	Nostocaceae	Anabaena	14	11	14	11	3	124	124
Bacteria	no rank	Cyanobacteria	no rank	Nostocales	Nostocaceae	Cylindrospermum	2	2	2	2	1	22	22
Bacteria	no rank	Cyanobacteria	no rank	Nostocales	Nostocaceae	Nostoc	50	47	50	47	12	945	945
Bacteria	no rank	Cyanobacteria	no rank	Nostocales	Nostocaceae	Richelia	2	1	1	2	0	5	5
Bacteria	no rank	Cyanobacteria	no rank	Nostocales	Nostocaceae	Trichormus	5	5	5	5	1	70	70
Bacteria	no rank	Cyanobacteria	no rank	Nostocales	Rivulariaceae	Microchaete	1	1	1	1	1	15	15
Bacteria	no rank	Cyanobacteria	no rank	Nostocales	Rivulariaceae	Rivularia	1	1	1	1	1	14	14
Bacteria	no rank	Cyanobacteria	no rank	Nostocales	Scytonemataceae	Scytonema	7	7	7	7	2	122	122
Bacteria	no rank	Cyanobacteria	no rank	Nostocales	Symphyonemataceae	Mastigocladopsis	1	1	1	1	0	11	11
Bacteria	no rank	Cyanobacteria	no rank	Nostocales	Tolypothrichaceae	Tolypothrix	6	6	6	6	4	112	112
Bacteria	no rank	Cyanobacteria	no rank	Nostocales	no rank	no rank	4	3	4	3	0	45	45
Bacteria	no rank	Cyanobacteria	no rank	Oscillatoriales	Coleofasciculaceae	Coleofasciculus	1	1	1	1	1	20	20
Bacteria	no rank	Cyanobacteria	no rank	Oscillatoriales	Coleofasciculaceae	Geitlerinema	3	3	3	3	0	74	74
Bacteria	no rank	Cyanobacteria	no rank	Oscillatoriales	Coleofasciculaceae	Roseofilum	1	1	1	1	0	30	30
Bacteria	no rank	Cyanobacteria	no rank	Oscillatoriales	Cyanothecaceae	Cyanothece	2	2	2	2	0	39	39
Bacteria	no rank	Cyanobacteria	no rank	Oscillatoriales	Desertifilaceae	Desertifilum	1	1	1	1	0	40	40
Bacteria	no rank	Cyanobacteria	no rank	Oscillatoriales	Gomontiellaceae	Crinalium	1	1	1	1	0	17	17
Bacteria	no rank	Cyanobacteria	no rank	Oscillatoriales	Gomontiellaceae	Hormoscilla	2	2	2	2	2	16	16
Bacteria	no rank	Cyanobacteria	no rank	Oscillatoriales	Microcoleaceae	Arthrospira	7	7	7	7	0	199	199
Bacteria	no rank	Cyanobacteria	no rank	Oscillatoriales	Microcoleaceae	Hydrocoleum	1	1	1	1	0	32	32
Bacteria	no rank	Cyanobacteria	no rank	Oscillatoriales	Microcoleaceae	Kamptonema	2	2	2	2	0	72	72
Bacteria	no rank	Cyanobacteria	no rank	Oscillatoriales	Microcoleaceae	Limnospira	3	3	3	3	0	96	96
Bacteria	no rank	Cyanobacteria	no rank	Oscillatoriales	Microcoleaceae	Microcoleus	2	2	2	2	0	32	32
Bacteria	no rank	Cyanobacteria	no rank	Oscillatoriales	Microcoleaceae	Planktothricoides	1	1	1	1	0	25	25
Bacteria	no rank	Cyanobacteria	no rank	Oscillatoriales	Microcoleaceae	Planktothrix	14	13	14	13	1	328	328
Bacteria	no rank	Cyanobacteria	no rank	Oscillatoriales	Microcoleaceae	Trichodesmium	1	1	1	1	0	6	6
Bacteria	no rank	Cyanobacteria	no rank	Oscillatoriales	Microcoleaceae	Tychonema	1	1	1	1	0	9	9
Bacteria	no rank	Cyanobacteria	no rank	Oscillatoriales	Oscillatoriaceae	Limnoraphis	1	1	1	1	0	46	45
Bacteria	no rank	Cyanobacteria	no rank	Oscillatoriales	Oscillatoriaceae	Lyngbya	3	3	3	3	0	142	142
Bacteria	no rank	Cyanobacteria	no rank	Oscillatoriales	Oscillatoriaceae	Moorea	5	5	5	5	2	43	43
Bacteria	no rank	Cyanobacteria	no rank	Oscillatoriales	Oscillatoriaceae	Okeania	2	2	2	2	0	22	22
Bacteria	no rank	Cyanobacteria	no rank	Oscillatoriales	Oscillatoriaceae	Oscillatoria	3	3	3	3	0	69	69
Bacteria	no rank	Cyanobacteria	no rank	Oscillatoriales	Oscillatoriaceae	Phormidium	7	6	7	6	0	197	197
Bacteria	no rank	Cyanobacteria	no rank	Oscillatoriales	no rank	no rank	32	14	32	14	0	364	364
Bacteria	no rank	Cyanobacteria	no rank	Pleurocapsales	Dermocarpellaceae	Stanieria	2	2	2	2	2	53	53
Bacteria	no rank	Cyanobacteria	no rank	Pleurocapsales	Hydrococcaceae	Hydrococcus	1	1	1	1	0	18	18
Bacteria	no rank	Cyanobacteria	no rank	Pleurocapsales	Hyellaceae	Hyella	1	1	1	1	1	36	36
Bacteria	no rank	Cyanobacteria	no rank	Pleurocapsales	Hyellaceae	Myxosarcina	1	1	1	1	0	35	35
Bacteria	no rank	Cyanobacteria	no rank	Pleurocapsales	Hyellaceae	Pleurocapsa	3	3	3	3	0	64	64
Bacteria	no rank	Cyanobacteria	no rank	Pleurocapsales	Xenococcaceae	Xenococcus	1	1	1	1	0	24	24
Bacteria	no rank	Cyanobacteria	no rank	Spirulinales	Spirulinaceae	Spirulina	3	2	3	2	0	94	94
Bacteria	no rank	Cyanobacteria	no rank	Synechococcales	Acaryochloridaceae	Acaryochloris	3	3	3	3	1	144	144
Bacteria	no rank	Cyanobacteria	no rank	Synechococcales	Chamaesiphonaceae	Chamaesiphon	2	1	2	1	0	6	6
Bacteria	no rank	Cyanobacteria	no rank	Synechococcales	Coelosphaeriaceae	Snowella	1	1	1	1	0	20	20
Bacteria	no rank	Cyanobacteria	no rank	Synechococcales	Leptolyngbyaceae	Alkalinema	1	0	1	0	1	15	15
Bacteria	no rank	Cyanobacteria	no rank	Synechococcales	Leptolyngbyaceae	Leptolyngbya	26	24	26	24	12	506	506
Bacteria	no rank	Cyanobacteria	no rank	Synechococcales	Leptolyngbyaceae	Neosynechococcus	1	1	1	1	0	11	11
Bacteria	no rank	Cyanobacteria	no rank	Synechococcales	Leptolyngbyaceae	Phormidesmis	5	4	5	4	1	47	47
Bacteria	no rank	Cyanobacteria	no rank	Synechococcales	Merismopediaceae	Aphanocapsa	2	0	0	2	0	2	2
Bacteria	no rank	Cyanobacteria	no rank	Synechococcales	Merismopediaceae	Merismopedia	1	1	1	1	0	25	25
Bacteria	no rank	Cyanobacteria	no rank	Synechococcales	Merismopediaceae	Synechocystis	10	10	10	10	1	221	221
Bacteria	no rank	Cyanobacteria	no rank	Synechococcales	Prochloraceae	Prochlorococcus	63	0	0	63	0	63	63
Bacteria	no rank	Cyanobacteria	no rank	Synechococcales	Prochlorotrichaceae	Halomicronema	2	2	2	2	0	68	68
Bacteria	no rank	Cyanobacteria	no rank	Synechococcales	Prochlorotrichaceae	Nodosilinea	1	1	1	1	0	35	35
Bacteria	no rank	Cyanobacteria	no rank	Synechococcales	Prochlorotrichaceae	Prochlorothrix	2	1	2	1	0	26	26
Bacteria	no rank	Cyanobacteria	no rank	Synechococcales	Pseudanabaenaceae	Limnothrix	4	3	4	3	0	78	78
Bacteria	no rank	Cyanobacteria	no rank	Synechococcales	Pseudanabaenaceae	Pseudanabaena	12	12	12	12	2	307	307
Bacteria	no rank	Cyanobacteria	no rank	Synechococcales	Synechococcaceae	Cyanobium	9	6	8	7	0	63	63
Bacteria	no rank	Cyanobacteria	no rank	Synechococcales	Synechococcaceae	Dactylococcopsis	1	1	1	1	0	2	2
Bacteria	no rank	Cyanobacteria	no rank	Synechococcales	Synechococcaceae	Synechococcus	96	49	51	94	0	494	494
Bacteria	no rank	Cyanobacteria	no rank	Synechococcales	Synechococcaceae	Thermosynechococcus	4	3	4	3	0	38	38
Bacteria	no rank	Cyanobacteria	no rank	Synechococcales	Synechococcaceae	Vulcanococcus	1	1	1	1	0	27	27
Bacteria	no rank	Cyanobacteria	no rank	Synechococcales	no rank	no rank	1	0	0	1	0	1	1
Bacteria	no rank	Cyanobacteria	no rank	no rank	no rank	no rank	51	25	48	28	2	613	613
Bacteria	no rank	Deferribacteres	Deferribacteres	Deferribacterales	Deferribacteraceae	Calditerrivibrio	2	2	2	2	0	29	29
Bacteria	no rank	Deferribacteres	Deferribacteres	Deferribacterales	Deferribacteraceae	Deferribacter	1	1	1	1	0	19	19
Bacteria	no rank	Deferribacteres	Deferribacteres	Deferribacterales	Deferribacteraceae	Denitrovibrio	3	3	3	3	0	94	94
Bacteria	no rank	Deferribacteres	Deferribacteres	Deferribacterales	Deferribacteraceae	Flexistipes	1	1	1	1	0	14	14
Bacteria	no rank	Deferribacteres	Deferribacteres	Deferribacterales	Deferribacteraceae	Geovibrio	2	2	2	2	0	58	58
Bacteria	no rank	Deferribacteres	Deferribacteres	Deferribacterales	Deferribacteraceae	Mucispirillum	2	2	2	2	0	4	4
Bacteria	no rank	Deferribacteres	Deferribacteres	Deferribacterales	Deferribacteraceae	Seleniivibrio	2	2	2	2	0	60	60
Bacteria	no rank	Deinococcus-Thermus	Deinococci	Deinococcales	Deinococcaceae	Deinococcus	63	48	63	48	12	1808	1806
Bacteria	no rank	Deinococcus-Thermus	Deinococci	Deinococcales	Trueperaceae	Truepera	1	1	1	1	0	11	11
Bacteria	no rank	Deinococcus-Thermus	Deinococci	Deinococcales	Trueperaceae	no rank	1	1	1	1	0	29	29
Bacteria	no rank	Deinococcus-Thermus	Deinococci	Thermales	Thermaceae	Marinithermus	1	1	1	1	0	9	9
Bacteria	no rank	Deinococcus-Thermus	Deinococci	Thermales	Thermaceae	Meiothermus	24	7	24	7	2	381	381
Bacteria	no rank	Deinococcus-Thermus	Deinococci	Thermales	Thermaceae	Oceanithermus	2	2	2	2	0	25	25
Bacteria	no rank	Deinococcus-Thermus	Deinococci	Thermales	Thermaceae	Thermus	77	76	77	76	0	525	525
Bacteria	no rank	Deinococcus-Thermus	no rank	no rank	no rank	no rank	1	0	1	0	0	2	2
Bacteria	no rank	Dictyoglomi	Dictyoglomia	Dictyoglomales	Dictyoglomaceae	Dictyoglomus	5	3	4	4	0	35	35
Bacteria	no rank	Elusimicrobia	Elusimicrobia	Elusimicrobiales	Elusimicrobiaceae	Elusimicrobium	2	0	2	0	0	6	6
Bacteria	no rank	Elusimicrobia	Endomicrobia	Endomicrobiales	Endomicrobiaceae	Endomicrobium	3	1	1	3	0	9	9
Bacteria	no rank	Elusimicrobia	no rank	no rank	no rank	no rank	66	44	65	45	7	368	368
Bacteria	no rank	Fibrobacteres	Chitinivibrionia	Chitinivibrionales	Chitinivibrionaceae	Chitinivibrio	1	1	1	1	0	12	12
Bacteria	no rank	Fibrobacteres	Fibrobacteria	Fibrobacterales	Fibrobacteraceae	Fibrobacter	43	43	43	43	5	1123	1122
Bacteria	no rank	Fibrobacteres	no rank	no rank	no rank	no rank	1	1	1	1	0	9	9
Bacteria	no rank	Firmicutes	Bacilli	Bacillales	Alicyclobacillaceae	Alicyclobacillus	23	23	23	23	2	257	257
Bacteria	no rank	Firmicutes	Bacilli	Bacillales	Alicyclobacillaceae	Effusibacillus	3	3	3	3	0	40	40
Bacteria	no rank	Firmicutes	Bacilli	Bacillales	Alicyclobacillaceae	Kyrpidia	2	2	2	2	0	16	16
Bacteria	no rank	Firmicutes	Bacilli	Bacillales	Alicyclobacillaceae	Tumebacillus	5	5	5	5	0	100	100
Bacteria	no rank	Firmicutes	Bacilli	Bacillales	Bacillaceae	Aeribacillus	7	7	7	7	0	85	85
Bacteria	no rank	Firmicutes	Bacilli	Bacillales	Bacillaceae	Alkalibacillus	2	2	2	2	0	15	15
Bacteria	no rank	Firmicutes	Bacilli	Bacillales	Bacillaceae	Alkalicoccus	3	3	3	3	0	44	44
Bacteria	no rank	Firmicutes	Bacilli	Bacillales	Bacillaceae	Allobacillus	2	2	2	2	0	13	13
Bacteria	no rank	Firmicutes	Bacilli	Bacillales	Bacillaceae	Alteribacillus	4	4	4	4	0	30	30
Bacteria	no rank	Firmicutes	Bacilli	Bacillales	Bacillaceae	Amphibacillus	4	4	4	4	1	34	34
Bacteria	no rank	Firmicutes	Bacilli	Bacillales	Bacillaceae	Anaerobacillus	5	5	5	5	1	111	106
Bacteria	no rank	Firmicutes	Bacilli	Bacillales	Bacillaceae	Anoxybacillus	35	33	35	33	4	444	444
Bacteria	no rank	Firmicutes	Bacilli	Bacillales	Bacillaceae	Aquibacillus	1	1	1	1	0	29	29
Bacteria	no rank	Firmicutes	Bacilli	Bacillales	Bacillaceae	Aquisalibacillus	1	1	1	1	1	14	14
Bacteria	no rank	Firmicutes	Bacilli	Bacillales	Bacillaceae	Aureibacillus	1	1	1	1	0	10	10
Bacteria	no rank	Firmicutes	Bacilli	Bacillales	Bacillaceae	Bacillus	4568	4534	4553	4549	423	57993	57981
Bacteria	no rank	Firmicutes	Bacilli	Bacillales	Bacillaceae	Caldalkalibacillus	1	1	1	1	0	10	10
Bacteria	no rank	Firmicutes	Bacilli	Bacillales	Bacillaceae	Caldibacillus	7	4	7	4	0	28	28
Bacteria	no rank	Firmicutes	Bacilli	Bacillales	Bacillaceae	Calditerricola	1	1	1	1	0	4	4
Bacteria	no rank	Firmicutes	Bacilli	Bacillales	Bacillaceae	Cerasibacillus	2	2	2	2	0	8	8
Bacteria	no rank	Firmicutes	Bacilli	Bacillales	Bacillaceae	Domibacillus	12	12	12	12	2	286	286
Bacteria	no rank	Firmicutes	Bacilli	Bacillales	Bacillaceae	Edaphobacillus	1	1	1	1	0	13	13
Bacteria	no rank	Firmicutes	Bacilli	Bacillales	Bacillaceae	Falsibacillus	2	2	2	2	0	32	32
Bacteria	no rank	Firmicutes	Bacilli	Bacillales	Bacillaceae	Fictibacillus	15	14	14	15	2	154	154
Bacteria	no rank	Firmicutes	Bacilli	Bacillales	Bacillaceae	Filobacillus	1	1	1	1	1	19	19
Bacteria	no rank	Firmicutes	Bacilli	Bacillales	Bacillaceae	Geobacillus	85	84	85	84	6	868	868
Bacteria	no rank	Firmicutes	Bacilli	Bacillales	Bacillaceae	Gracilibacillus	14	10	13	11	1	184	184
Bacteria	no rank	Firmicutes	Bacilli	Bacillales	Bacillaceae	Halalkalibacillus	2	2	2	2	0	29	29
Bacteria	no rank	Firmicutes	Bacilli	Bacillales	Bacillaceae	Halobacillus	24	24	24	24	3	336	336
Bacteria	no rank	Firmicutes	Bacilli	Bacillales	Bacillaceae	Halolactibacillus	7	7	7	7	0	179	179
Bacteria	no rank	Firmicutes	Bacilli	Bacillales	Bacillaceae	Hydrogenibacillus	3	3	3	3	0	17	17
Bacteria	no rank	Firmicutes	Bacilli	Bacillales	Bacillaceae	Lentibacillus	10	10	10	10	0	67	67
Bacteria	no rank	Firmicutes	Bacilli	Bacillales	Bacillaceae	Lottiidibacillus	1	1	1	1	0	26	26
Bacteria	no rank	Firmicutes	Bacilli	Bacillales	Bacillaceae	Lysinibacillus	112	111	112	111	17	2649	2645
Bacteria	no rank	Firmicutes	Bacilli	Bacillales	Bacillaceae	Marinococcus	5	5	5	5	0	57	57
Bacteria	no rank	Firmicutes	Bacilli	Bacillales	Bacillaceae	Massilibacterium	2	2	2	2	2	32	32
Bacteria	no rank	Firmicutes	Bacilli	Bacillales	Bacillaceae	Melghiribacillus	1	1	1	1	0	15	15
Bacteria	no rank	Firmicutes	Bacilli	Bacillales	Bacillaceae	Natribacillus	1	1	1	1	0	5	5
Bacteria	no rank	Firmicutes	Bacilli	Bacillales	Bacillaceae	Numidum	2	2	2	2	0	10	10
Bacteria	no rank	Firmicutes	Bacilli	Bacillales	Bacillaceae	Oceanobacillus	32	32	32	32	2	289	289
Bacteria	no rank	Firmicutes	Bacilli	Bacillales	Bacillaceae	Ornithinibacillus	4	4	4	4	0	64	64
Bacteria	no rank	Firmicutes	Bacilli	Bacillales	Bacillaceae	Parageobacillus	19	18	19	18	2	241	241
Bacteria	no rank	Firmicutes	Bacilli	Bacillales	Bacillaceae	Paraliobacillus	8	7	8	7	1	151	149
Bacteria	no rank	Firmicutes	Bacilli	Bacillales	Bacillaceae	Paucisalibacillus	3	3	3	3	0	45	45
Bacteria	no rank	Firmicutes	Bacilli	Bacillales	Bacillaceae	Pelagirhabdus	1	1	1	1	0	19	19
Bacteria	no rank	Firmicutes	Bacilli	Bacillales	Bacillaceae	Piscibacillus	1	1	1	1	0	8	8
Bacteria	no rank	Firmicutes	Bacilli	Bacillales	Bacillaceae	Pontibacillus	7	7	7	7	0	106	106
Bacteria	no rank	Firmicutes	Bacilli	Bacillales	Bacillaceae	Pradoshia	2	2	2	2	0	12	12
Bacteria	no rank	Firmicutes	Bacilli	Bacillales	Bacillaceae	Pseudogracilibacillus	1	1	1	1	0	14	14
Bacteria	no rank	Firmicutes	Bacilli	Bacillales	Bacillaceae	Psychrobacillus	10	10	10	10	2	205	205
Bacteria	no rank	Firmicutes	Bacilli	Bacillales	Bacillaceae	Pueribacillus	1	1	1	1	0	6	6
Bacteria	no rank	Firmicutes	Bacilli	Bacillales	Bacillaceae	Quasibacillus	2	2	2	2	0	28	28
Bacteria	no rank	Firmicutes	Bacilli	Bacillales	Bacillaceae	Rubeoparvulum	2	2	2	2	2	36	36
Bacteria	no rank	Firmicutes	Bacilli	Bacillales	Bacillaceae	Salibacterium	2	2	2	2	0	20	20
Bacteria	no rank	Firmicutes	Bacilli	Bacillales	Bacillaceae	Salimicrobium	8	8	8	8	0	117	117
Bacteria	no rank	Firmicutes	Bacilli	Bacillales	Bacillaceae	Salinibacillus	1	1	1	1	0	8	8
Bacteria	no rank	Firmicutes	Bacilli	Bacillales	Bacillaceae	Salipaludibacillus	5	5	5	5	0	95	95
Bacteria	no rank	Firmicutes	Bacilli	Bacillales	Bacillaceae	Salirhabdus	1	1	1	1	0	15	15
Bacteria	no rank	Firmicutes	Bacilli	Bacillales	Bacillaceae	Salisediminibacterium	4	4	4	4	0	69	69
Bacteria	no rank	Firmicutes	Bacilli	Bacillales	Bacillaceae	Saliterribacillus	1	1	1	1	0	26	26
Bacteria	no rank	Firmicutes	Bacilli	Bacillales	Bacillaceae	Salsuginibacillus	2	2	2	2	0	27	27
Bacteria	no rank	Firmicutes	Bacilli	Bacillales	Bacillaceae	Sediminibacillus	5	5	5	5	0	51	51
Bacteria	no rank	Firmicutes	Bacilli	Bacillales	Bacillaceae	Streptohalobacillus	1	1	1	1	0	26	26
Bacteria	no rank	Firmicutes	Bacilli	Bacillales	Bacillaceae	Tenuibacillus	2	2	2	2	2	30	30
Bacteria	no rank	Firmicutes	Bacilli	Bacillales	Bacillaceae	Tepidibacillus	2	2	2	2	0	13	13
Bacteria	no rank	Firmicutes	Bacilli	Bacillales	Bacillaceae	Terribacillus	17	17	17	17	1	186	186
Bacteria	no rank	Firmicutes	Bacilli	Bacillales	Bacillaceae	Terrilactibacillus	2	2	2	2	0	16	16
Bacteria	no rank	Firmicutes	Bacilli	Bacillales	Bacillaceae	Thalassobacillus	5	5	5	5	1	45	45
Bacteria	no rank	Firmicutes	Bacilli	Bacillales	Bacillaceae	Thermolongibacillus	1	1	1	1	0	12	12
Bacteria	no rank	Firmicutes	Bacilli	Bacillales	Bacillaceae	Virgibacillus	40	39	39	40	8	280	280
Bacteria	no rank	Firmicutes	Bacilli	Bacillales	Bacillaceae	Vulcanibacillus	1	1	1	1	0	5	5
Bacteria	no rank	Firmicutes	Bacilli	Bacillales	Bacillaceae	no rank	14	11	14	11	0	182	182
Bacteria	no rank	Firmicutes	Bacilli	Bacillales	Bacillales Family X. Incertae Sedis	Thermicanus	1	1	1	1	0	9	9
Bacteria	no rank	Firmicutes	Bacilli	Bacillales	Listeriaceae	Brochothrix	25	13	13	25	0	38	38
Bacteria	no rank	Firmicutes	Bacilli	Bacillales	Listeriaceae	Listeria	3255	3232	3235	3252	260	16357	16333
Bacteria	no rank	Firmicutes	Bacilli	Bacillales	Listeriaceae	no rank	1	1	1	1	0	2	2
Bacteria	no rank	Firmicutes	Bacilli	Bacillales	Paenibacillaceae	Ammoniphilus	3	3	3	3	1	94	94
Bacteria	no rank	Firmicutes	Bacilli	Bacillales	Paenibacillaceae	Aneurinibacillus	18	18	18	18	0	307	307
Bacteria	no rank	Firmicutes	Bacilli	Bacillales	Paenibacillaceae	Brevibacillus	84	83	84	83	8	1552	1552
Bacteria	no rank	Firmicutes	Bacilli	Bacillales	Paenibacillaceae	Cohnella	20	20	20	20	3	814	814
Bacteria	no rank	Firmicutes	Bacilli	Bacillales	Paenibacillaceae	Fontibacillus	2	2	2	2	0	51	51
Bacteria	no rank	Firmicutes	Bacilli	Bacillales	Paenibacillaceae	Gorillibacterium	3	3	3	3	2	74	74
Bacteria	no rank	Firmicutes	Bacilli	Bacillales	Paenibacillaceae	Longirhabdus	1	1	1	1	0	4	4
Bacteria	no rank	Firmicutes	Bacilli	Bacillales	Paenibacillaceae	Paenibacillus	535	528	533	530	83	17487	17484
Bacteria	no rank	Firmicutes	Bacilli	Bacillales	Paenibacillaceae	Saccharibacillus	6	5	5	6	1	218	218
Bacteria	no rank	Firmicutes	Bacilli	Bacillales	Paenibacillaceae	Thermobacillus	3	3	3	3	0	53	53
Bacteria	no rank	Firmicutes	Bacilli	Bacillales	Paenibacillaceae	no rank	9	9	9	9	0	244	244
Bacteria	no rank	Firmicutes	Bacilli	Bacillales	Planococcaceae	Bhargavaea	6	6	6	6	0	78	78
Bacteria	no rank	Firmicutes	Bacilli	Bacillales	Planococcaceae	Caryophanon	2	2	2	2	0	59	59
Bacteria	no rank	Firmicutes	Bacilli	Bacillales	Planococcaceae	Chryseomicrobium	1	1	1	1	0	27	27
Bacteria	no rank	Firmicutes	Bacilli	Bacillales	Planococcaceae	Filibacter	1	1	1	1	0	13	13
Bacteria	no rank	Firmicutes	Bacilli	Bacillales	Planococcaceae	Jeotgalibacillus	8	8	8	8	1	148	148
Bacteria	no rank	Firmicutes	Bacilli	Bacillales	Planococcaceae	Kurthia	17	17	17	17	4	279	279
Bacteria	no rank	Firmicutes	Bacilli	Bacillales	Planococcaceae	Paenisporosarcina	8	8	8	8	0	152	152
Bacteria	no rank	Firmicutes	Bacilli	Bacillales	Planococcaceae	Planococcus	34	33	34	33	6	589	588
Bacteria	no rank	Firmicutes	Bacilli	Bacillales	Planococcaceae	Planomicrobium	13	12	13	12	1	230	230
Bacteria	no rank	Firmicutes	Bacilli	Bacillales	Planococcaceae	Rummeliibacillus	8	8	8	8	1	136	136
Bacteria	no rank	Firmicutes	Bacilli	Bacillales	Planococcaceae	Solibacillus	7	7	7	7	1	165	165
Bacteria	no rank	Firmicutes	Bacilli	Bacillales	Planococcaceae	Sporosarcina	44	44	44	44	7	710	710
Bacteria	no rank	Firmicutes	Bacilli	Bacillales	Planococcaceae	Tetzosporium	1	1	1	1	0	21	21
Bacteria	no rank	Firmicutes	Bacilli	Bacillales	Planococcaceae	Ureibacillus	4	4	4	4	0	46	46
Bacteria	no rank	Firmicutes	Bacilli	Bacillales	Planococcaceae	Viridibacillus	6	6	6	6	0	109	109
Bacteria	no rank	Firmicutes	Bacilli	Bacillales	Planococcaceae	no rank	2	2	2	2	0	38	38
Bacteria	no rank	Firmicutes	Bacilli	Bacillales	Sporolactobacillaceae	Caenibacillus	1	1	1	1	0	6	6
Bacteria	no rank	Firmicutes	Bacilli	Bacillales	Sporolactobacillaceae	Scopulibacillus	1	1	1	1	0	15	15
Bacteria	no rank	Firmicutes	Bacilli	Bacillales	Sporolactobacillaceae	Sinobaca	1	1	1	1	0	22	22
Bacteria	no rank	Firmicutes	Bacilli	Bacillales	Sporolactobacillaceae	Sporolactobacillus	18	18	18	18	1	169	169
Bacteria	no rank	Firmicutes	Bacilli	Bacillales	Sporolactobacillaceae	Tuberibacillus	2	2	2	2	0	13	13
Bacteria	no rank	Firmicutes	Bacilli	Bacillales	Sporolactobacillaceae	no rank	2	2	2	2	1	72	72
Bacteria	no rank	Firmicutes	Bacilli	Bacillales	Staphylococcaceae	Abyssicoccus	1	1	1	1	0	2	2
Bacteria	no rank	Firmicutes	Bacilli	Bacillales	Staphylococcaceae	Aliicoccus	1	1	1	1	0	3	3
Bacteria	no rank	Firmicutes	Bacilli	Bacillales	Staphylococcaceae	Auricoccus	1	1	1	1	0	3	3
Bacteria	no rank	Firmicutes	Bacilli	Bacillales	Staphylococcaceae	Jeotgalicoccus	6	6	6	6	0	25	25
Bacteria	no rank	Firmicutes	Bacilli	Bacillales	Staphylococcaceae	Macrococcus	67	67	67	67	7	148	148
Bacteria	no rank	Firmicutes	Bacilli	Bacillales	Staphylococcaceae	Nosocomiicoccus	7	7	7	7	0	14	14
Bacteria	no rank	Firmicutes	Bacilli	Bacillales	Staphylococcaceae	Salinicoccus	14	14	14	14	0	51	51
Bacteria	no rank	Firmicutes	Bacilli	Bacillales	Staphylococcaceae	Staphylococcus	13509	13410	13468	13451	327	27425	27417
Bacteria	no rank	Firmicutes	Bacilli	Bacillales	Staphylococcaceae	no rank	1	1	1	1	0	2	2
Bacteria	no rank	Firmicutes	Bacilli	Bacillales	Thermoactinomycetaceae	Baia	1	1	1	1	0	4	4
Bacteria	no rank	Firmicutes	Bacilli	Bacillales	Thermoactinomycetaceae	Desmospora	1	1	1	1	0	5	5
Bacteria	no rank	Firmicutes	Bacilli	Bacillales	Thermoactinomycetaceae	Hazenella	1	1	1	1	0	3	3
Bacteria	no rank	Firmicutes	Bacilli	Bacillales	Thermoactinomycetaceae	Kroppenstedtia	2	2	2	2	0	10	10
Bacteria	no rank	Firmicutes	Bacilli	Bacillales	Thermoactinomycetaceae	Laceyella	4	3	3	4	0	18	18
Bacteria	no rank	Firmicutes	Bacilli	Bacillales	Thermoactinomycetaceae	Lihuaxuella	1	1	1	1	0	6	6
Bacteria	no rank	Firmicutes	Bacilli	Bacillales	Thermoactinomycetaceae	Marininema	2	2	2	2	0	9	9
Bacteria	no rank	Firmicutes	Bacilli	Bacillales	Thermoactinomycetaceae	Melghirimyces	3	3	3	3	0	19	19
Bacteria	no rank	Firmicutes	Bacilli	Bacillales	Thermoactinomycetaceae	Novibacillus	1	1	1	1	0	8	8
Bacteria	no rank	Firmicutes	Bacilli	Bacillales	Thermoactinomycetaceae	Paludifilum	1	1	1	1	0	4	4
Bacteria	no rank	Firmicutes	Bacilli	Bacillales	Thermoactinomycetaceae	Planifilum	2	2	2	2	0	7	7
Bacteria	no rank	Firmicutes	Bacilli	Bacillales	Thermoactinomycetaceae	Risungbinella	2	2	2	2	0	8	8
Bacteria	no rank	Firmicutes	Bacilli	Bacillales	Thermoactinomycetaceae	Seinonella	1	1	1	1	0	4	4
Bacteria	no rank	Firmicutes	Bacilli	Bacillales	Thermoactinomycetaceae	Shimazuella	1	1	1	1	0	4	4
Bacteria	no rank	Firmicutes	Bacilli	Bacillales	Thermoactinomycetaceae	Staphylospora	1	1	1	1	0	4	4
Bacteria	no rank	Firmicutes	Bacilli	Bacillales	Thermoactinomycetaceae	Thermoactinomyces	9	9	9	9	0	38	38
Bacteria	no rank	Firmicutes	Bacilli	Bacillales	Thermoactinomycetaceae	Thermoflavimicrobium	2	2	2	2	1	10	10
Bacteria	no rank	Firmicutes	Bacilli	Bacillales	no rank	Acidibacillus	5	5	5	5	0	56	56
Bacteria	no rank	Firmicutes	Bacilli	Bacillales	no rank	Candidatus Carbobacillus	1	1	1	1	0	8	8
Bacteria	no rank	Firmicutes	Bacilli	Bacillales	no rank	Desulfuribacillus	2	2	2	2	0	59	59
Bacteria	no rank	Firmicutes	Bacilli	Bacillales	no rank	Exiguobacterium	71	71	71	71	4	1877	1872
Bacteria	no rank	Firmicutes	Bacilli	Bacillales	no rank	Gemella	20	0	0	20	2	22	22
Bacteria	no rank	Firmicutes	Bacilli	Bacillales	no rank	Geomicrobium	4	2	2	4	0	7	7
Bacteria	no rank	Firmicutes	Bacilli	Bacillales	no rank	no rank	4	3	3	4	0	67	67
Bacteria	no rank	Firmicutes	Bacilli	Lactobacillales	Aerococcaceae	Abiotrophia	2	0	0	2	0	2	2
Bacteria	no rank	Firmicutes	Bacilli	Lactobacillales	Aerococcaceae	Aerococcus	70	14	14	70	0	87	87
Bacteria	no rank	Firmicutes	Bacilli	Lactobacillales	Aerococcaceae	Dolosicoccus	3	0	0	3	0	3	3
Bacteria	no rank	Firmicutes	Bacilli	Lactobacillales	Aerococcaceae	Eremococcus	2	0	0	2	0	2	2
Bacteria	no rank	Firmicutes	Bacilli	Lactobacillales	Aerococcaceae	Facklamia	10	2	2	10	0	12	12
Bacteria	no rank	Firmicutes	Bacilli	Lactobacillales	Aerococcaceae	Globicatella	4	4	4	4	0	10	10
Bacteria	no rank	Firmicutes	Bacilli	Lactobacillales	Aerococcaceae	Ignavigranum	1	1	1	1	0	2	2
Bacteria	no rank	Firmicutes	Bacilli	Lactobacillales	Aerococcaceae	Suicoccus	1	1	1	1	0	2	2
Bacteria	no rank	Firmicutes	Bacilli	Lactobacillales	Aerococcaceae	Vaginisenegalia	1	0	0	1	0	1	1
Bacteria	no rank	Firmicutes	Bacilli	Lactobacillales	Carnobacteriaceae	Agitococcus	1	0	1	0	1	25	25
Bacteria	no rank	Firmicutes	Bacilli	Lactobacillales	Carnobacteriaceae	Alkalibacterium	12	12	12	12	1	120	120
Bacteria	no rank	Firmicutes	Bacilli	Lactobacillales	Carnobacteriaceae	Allofustis	1	0	0	1	0	1	1
Bacteria	no rank	Firmicutes	Bacilli	Lactobacillales	Carnobacteriaceae	Alloiococcus	2	0	0	2	0	2	2
Bacteria	no rank	Firmicutes	Bacilli	Lactobacillales	Carnobacteriaceae	Atopobacter	2	0	0	2	0	2	2
Bacteria	no rank	Firmicutes	Bacilli	Lactobacillales	Carnobacteriaceae	Atopococcus	1	1	1	1	0	4	4
Bacteria	no rank	Firmicutes	Bacilli	Lactobacillales	Carnobacteriaceae	Atopostipes	1	0	0	1	1	2	2
Bacteria	no rank	Firmicutes	Bacilli	Lactobacillales	Carnobacteriaceae	Carnobacterium	92	89	91	90	20	639	639
Bacteria	no rank	Firmicutes	Bacilli	Lactobacillales	Carnobacteriaceae	Desemzia	1	1	1	1	0	6	6
Bacteria	no rank	Firmicutes	Bacilli	Lactobacillales	Carnobacteriaceae	Dolosigranulum	14	9	9	14	1	24	24
Bacteria	no rank	Firmicutes	Bacilli	Lactobacillales	Carnobacteriaceae	Granulicatella	8	1	1	8	4	19	19
Bacteria	no rank	Firmicutes	Bacilli	Lactobacillales	Carnobacteriaceae	Isobaculum	1	1	1	1	0	2	2
Bacteria	no rank	Firmicutes	Bacilli	Lactobacillales	Carnobacteriaceae	Jeotgalibaca	5	5	5	5	0	22	22
Bacteria	no rank	Firmicutes	Bacilli	Lactobacillales	Carnobacteriaceae	Lacticigenium	1	1	1	1	0	8	8
Bacteria	no rank	Firmicutes	Bacilli	Lactobacillales	Carnobacteriaceae	Marinilactibacillus	7	7	7	7	0	45	45
Bacteria	no rank	Firmicutes	Bacilli	Lactobacillales	Carnobacteriaceae	Pisciglobus	1	1	1	1	1	4	4
Bacteria	no rank	Firmicutes	Bacilli	Lactobacillales	Carnobacteriaceae	Trichococcus	18	15	16	17	6	105	103
Bacteria	no rank	Firmicutes	Bacilli	Lactobacillales	Enterococcaceae	Bavariicoccus	1	0	0	1	1	2	2
Bacteria	no rank	Firmicutes	Bacilli	Lactobacillales	Enterococcaceae	Catellicoccus	1	0	0	1	0	1	1
Bacteria	no rank	Firmicutes	Bacilli	Lactobacillales	Enterococcaceae	Enterococcus	3639	2497	2516	3618	543	9733	9727
Bacteria	no rank	Firmicutes	Bacilli	Lactobacillales	Enterococcaceae	Melissococcus	19	1	1	19	0	20	20
Bacteria	no rank	Firmicutes	Bacilli	Lactobacillales	Enterococcaceae	Pilibacter	1	1	1	1	0	2	2
Bacteria	no rank	Firmicutes	Bacilli	Lactobacillales	Enterococcaceae	Tetragenococcus	24	20	20	24	2	46	46
Bacteria	no rank	Firmicutes	Bacilli	Lactobacillales	Enterococcaceae	Vagococcus	26	24	25	25	3	55	55
Bacteria	no rank	Firmicutes	Bacilli	Lactobacillales	Enterococcaceae	no rank	1	1	1	1	0	2	2
Bacteria	no rank	Firmicutes	Bacilli	Lactobacillales	Lactobacillaceae	Lactobacillus	2576	1242	1263	2552	154	6009	6007
Bacteria	no rank	Firmicutes	Bacilli	Lactobacillales	Lactobacillaceae	Pediococcus	91	77	77	91	2	206	206
Bacteria	no rank	Firmicutes	Bacilli	Lactobacillales	Lactobacillaceae	Sharpea	4	4	4	4	0	14	14
Bacteria	no rank	Firmicutes	Bacilli	Lactobacillales	Leuconostocaceae	Convivina	1	0	0	1	0	1	1
Bacteria	no rank	Firmicutes	Bacilli	Lactobacillales	Leuconostocaceae	Fructobacillus	9	0	0	9	0	9	9
Bacteria	no rank	Firmicutes	Bacilli	Lactobacillales	Leuconostocaceae	Leuconostoc	181	172	175	178	7	452	452
Bacteria	no rank	Firmicutes	Bacilli	Lactobacillales	Leuconostocaceae	Oenococcus	234	26	28	232	3	265	265
Bacteria	no rank	Firmicutes	Bacilli	Lactobacillales	Leuconostocaceae	Weissella	124	52	54	122	0	203	203
Bacteria	no rank	Firmicutes	Bacilli	Lactobacillales	Leuconostocaceae	no rank	2	1	1	2	0	3	3
Bacteria	no rank	Firmicutes	Bacilli	Lactobacillales	Streptococcaceae	Floricoccus	2	2	2	2	0	6	6
Bacteria	no rank	Firmicutes	Bacilli	Lactobacillales	Streptococcaceae	Lactococcus	260	68	68	260	23	393	393
Bacteria	no rank	Firmicutes	Bacilli	Lactobacillales	Streptococcaceae	Streptococcus	14668	204	213	14654	633	15568	15556
Bacteria	no rank	Firmicutes	Bacilli	Lactobacillales	Streptococcaceae	no rank	3	0	0	3	1	4	4
Bacteria	no rank	Firmicutes	Bacilli	Lactobacillales	no rank	no rank	2	0	0	2	0	2	2
Bacteria	no rank	Firmicutes	Bacilli	no rank	no rank	no rank	8	8	8	8	0	32	32
Bacteria	no rank	Firmicutes	Clostridia	Candidatus Borkfalkiales	Candidatus Borkfalkiaceae	Candidatus Borkfalkia	1	1	1	1	0	6	6
Bacteria	no rank	Firmicutes	Clostridia	Clostridiales	Caldicoprobacteraceae	Caldicoprobacter	3	2	3	2	0	26	26
Bacteria	no rank	Firmicutes	Clostridia	Clostridiales	Catabacteriaceae	Catabacter	3	3	3	3	0	50	50
Bacteria	no rank	Firmicutes	Clostridia	Clostridiales	Christensenellaceae	Christensenella	9	9	9	9	0	159	159
Bacteria	no rank	Firmicutes	Clostridia	Clostridiales	Christensenellaceae	no rank	1	1	1	1	0	22	22
Bacteria	no rank	Firmicutes	Clostridia	Clostridiales	Clostridiaceae	Abyssisolibacter	1	1	1	1	0	15	15
Bacteria	no rank	Firmicutes	Clostridia	Clostridiales	Clostridiaceae	Alkaliphilus	5	5	5	5	2	89	89
Bacteria	no rank	Firmicutes	Clostridia	Clostridiales	Clostridiaceae	Anaeromicrobium	1	1	1	1	0	31	31
Bacteria	no rank	Firmicutes	Clostridia	Clostridiales	Clostridiaceae	Beduini	2	2	2	2	0	52	52
Bacteria	no rank	Firmicutes	Clostridia	Clostridiales	Clostridiaceae	Butyricicoccus	26	25	26	25	2	273	273
Bacteria	no rank	Firmicutes	Clostridia	Clostridiales	Clostridiaceae	Caldisalinibacter	1	1	1	1	0	10	10
Bacteria	no rank	Firmicutes	Clostridia	Clostridiales	Clostridiaceae	Caloramator	7	7	7	7	0	109	109
Bacteria	no rank	Firmicutes	Clostridia	Clostridiales	Clostridiaceae	Caloranaerobacter	4	4	4	4	1	34	34
Bacteria	no rank	Firmicutes	Clostridia	Clostridiales	Clostridiaceae	Caminicella	2	2	2	2	0	26	26
Bacteria	no rank	Firmicutes	Clostridia	Clostridiales	Clostridiaceae	Candidatus Arthromitus	6	6	6	6	0	12	12
Bacteria	no rank	Firmicutes	Clostridia	Clostridiales	Clostridiaceae	Clostridiisalibacter	1	1	1	1	0	17	17
Bacteria	no rank	Firmicutes	Clostridia	Clostridiales	Clostridiaceae	Clostridium	1050	970	1036	983	96	12984	12429
Bacteria	no rank	Firmicutes	Clostridia	Clostridiales	Clostridiaceae	Desnuesiella	1	1	1	1	1	27	27
Bacteria	no rank	Firmicutes	Clostridia	Clostridiales	Clostridiaceae	Fervidicella	1	1	1	1	0	14	14
Bacteria	no rank	Firmicutes	Clostridia	Clostridiales	Clostridiaceae	Fonticella	1	1	1	1	0	13	13
Bacteria	no rank	Firmicutes	Clostridia	Clostridiales	Clostridiaceae	Geosporobacter	2	2	2	2	0	44	44
Bacteria	no rank	Firmicutes	Clostridia	Clostridiales	Clostridiaceae	Haloimpatiens	2	2	2	2	0	23	23
Bacteria	no rank	Firmicutes	Clostridia	Clostridiales	Clostridiaceae	Hathewaya	2	2	2	2	0	15	15
Bacteria	no rank	Firmicutes	Clostridia	Clostridiales	Clostridiaceae	Hungatella	23	22	23	22	1	1138	1138
Bacteria	no rank	Firmicutes	Clostridia	Clostridiales	Clostridiaceae	Inediibacterium	1	1	1	1	1	13	13
Bacteria	no rank	Firmicutes	Clostridia	Clostridiales	Clostridiaceae	Keratinibaculum	1	1	1	1	0	6	6
Bacteria	no rank	Firmicutes	Clostridia	Clostridiales	Clostridiaceae	Lactonifactor	10	10	10	10	0	146	146
Bacteria	no rank	Firmicutes	Clostridia	Clostridiales	Clostridiaceae	Lutispora	1	1	1	1	0	11	11
Bacteria	no rank	Firmicutes	Clostridia	Clostridiales	Clostridiaceae	Maledivibacter	1	1	1	1	0	27	27
Bacteria	no rank	Firmicutes	Clostridia	Clostridiales	Clostridiaceae	Marinisporobacter	1	1	1	1	0	16	16
Bacteria	no rank	Firmicutes	Clostridia	Clostridiales	Clostridiaceae	Massilioclostridium	2	2	2	2	0	4	4
Bacteria	no rank	Firmicutes	Clostridia	Clostridiales	Clostridiaceae	Mordavella	1	1	1	1	0	11	11
Bacteria	no rank	Firmicutes	Clostridia	Clostridiales	Clostridiaceae	Natronincola	2	2	2	2	0	36	36
Bacteria	no rank	Firmicutes	Clostridia	Clostridiales	Clostridiaceae	Oxobacter	1	1	1	1	0	18	18
Bacteria	no rank	Firmicutes	Clostridia	Clostridiales	Clostridiaceae	Paramaledivibacter	1	1	1	1	0	15	15
Bacteria	no rank	Firmicutes	Clostridia	Clostridiales	Clostridiaceae	Proteiniclasticum	3	3	3	3	2	87	87
Bacteria	no rank	Firmicutes	Clostridia	Clostridiales	Clostridiaceae	Sarcina	1	1	1	1	0	3	3
Bacteria	no rank	Firmicutes	Clostridia	Clostridiales	Clostridiaceae	Senegalia	1	1	1	1	0	9	9
Bacteria	no rank	Firmicutes	Clostridia	Clostridiales	Clostridiaceae	Serpentinicella	1	1	1	1	0	27	27
Bacteria	no rank	Firmicutes	Clostridia	Clostridiales	Clostridiaceae	Thermobrachium	1	1	1	1	0	16	16
Bacteria	no rank	Firmicutes	Clostridia	Clostridiales	Clostridiaceae	Thermohalobacter	1	1	1	1	0	11	11
Bacteria	no rank	Firmicutes	Clostridia	Clostridiales	Clostridiaceae	Thermotalea	1	1	1	1	0	13	13
Bacteria	no rank	Firmicutes	Clostridia	Clostridiales	Clostridiaceae	Tindallia	3	3	3	3	1	108	108
Bacteria	no rank	Firmicutes	Clostridia	Clostridiales	Clostridiaceae	Youngiibacter	1	1	1	1	1	6	6
Bacteria	no rank	Firmicutes	Clostridia	Clostridiales	Clostridiaceae	no rank	54	53	54	53	11	828	827
Bacteria	no rank	Firmicutes	Clostridia	Clostridiales	Clostridiales Family XII. Incertae Sedis	Acidaminobacter	1	1	1	1	0	18	18
Bacteria	no rank	Firmicutes	Clostridia	Clostridiales	Clostridiales Family XII. Incertae Sedis	Fusibacter	2	2	2	2	0	111	111
Bacteria	no rank	Firmicutes	Clostridia	Clostridiales	Clostridiales Family XIII. Incertae Sedis	Alterileibacterium	1	0	0	1	0	1	1
Bacteria	no rank	Firmicutes	Clostridia	Clostridiales	Clostridiales Family XIII. Incertae Sedis	Aminipila	1	1	1	1	0	17	17
Bacteria	no rank	Firmicutes	Clostridia	Clostridiales	Clostridiales Family XIII. Incertae Sedis	Anaerovorax	1	1	1	1	0	17	17
Bacteria	no rank	Firmicutes	Clostridia	Clostridiales	Clostridiales Family XIII. Incertae Sedis	Bacilliculturomica	1	1	1	1	1	26	26
Bacteria	no rank	Firmicutes	Clostridia	Clostridiales	Clostridiales Family XIII. Incertae Sedis	Casaltella	1	0	0	1	1	2	2
Bacteria	no rank	Firmicutes	Clostridia	Clostridiales	Clostridiales Family XIII. Incertae Sedis	Emergencia	3	3	3	3	0	87	87
Bacteria	no rank	Firmicutes	Clostridia	Clostridiales	Clostridiales Family XIII. Incertae Sedis	Mobilibacterium	1	1	1	1	0	15	15
Bacteria	no rank	Firmicutes	Clostridia	Clostridiales	Clostridiales Family XIII. Incertae Sedis	Mogibacterium	4	0	0	4	0	4	4
Bacteria	no rank	Firmicutes	Clostridia	Clostridiales	Clostridiales Family XIII. Incertae Sedis	no rank	9	1	1	9	1	11	11
Bacteria	no rank	Firmicutes	Clostridia	Clostridiales	Clostridiales Family XVI. Incertae Sedis	Carboxydocella	5	5	5	5	0	72	72
Bacteria	no rank	Firmicutes	Clostridia	Clostridiales	Clostridiales Family XVII. Incertae Sedis	Sulfobacillus	15	14	15	14	0	272	272
Bacteria	no rank	Firmicutes	Clostridia	Clostridiales	Clostridiales Family XVII. Incertae Sedis	Thermaerobacter	4	4	4	4	0	19	19
Bacteria	no rank	Firmicutes	Clostridia	Clostridiales	Defluviitaleaceae	Defluviitalea	1	1	1	1	0	13	13
Bacteria	no rank	Firmicutes	Clostridia	Clostridiales	Eubacteriaceae	Acetobacterium	12	12	12	12	2	733	733
Bacteria	no rank	Firmicutes	Clostridia	Clostridiales	Eubacteriaceae	Alkalibacter	1	1	1	1	0	22	22
Bacteria	no rank	Firmicutes	Clostridia	Clostridiales	Eubacteriaceae	Alkalibaculum	2	2	2	2	0	27	27
Bacteria	no rank	Firmicutes	Clostridia	Clostridiales	Eubacteriaceae	Aminicella	1	1	1	1	0	13	13
Bacteria	no rank	Firmicutes	Clostridia	Clostridiales	Eubacteriaceae	Anaerofustis	4	3	3	4	0	21	21
Bacteria	no rank	Firmicutes	Clostridia	Clostridiales	Eubacteriaceae	Eubacterium	130	110	128	112	9	2313	2085
Bacteria	no rank	Firmicutes	Clostridia	Clostridiales	Eubacteriaceae	Garciella	2	2	2	2	1	12	12
Bacteria	no rank	Firmicutes	Clostridia	Clostridiales	Eubacteriaceae	Intestinibacillus	3	3	3	3	0	44	44
Bacteria	no rank	Firmicutes	Clostridia	Clostridiales	Eubacteriaceae	Pseudoramibacter	1	0	1	0	0	1	1
Bacteria	no rank	Firmicutes	Clostridia	Clostridiales	Eubacteriaceae	no rank	17	16	17	16	5	185	185
Bacteria	no rank	Firmicutes	Clostridia	Clostridiales	Gracilibacteraceae	Gracilibacter	1	0	1	0	0	27	27
Bacteria	no rank	Firmicutes	Clostridia	Clostridiales	Heliobacteriaceae	Heliobacterium	1	1	1	1	1	10	10
Bacteria	no rank	Firmicutes	Clostridia	Clostridiales	Heliobacteriaceae	Heliophilum	1	1	1	1	0	11	11
Bacteria	no rank	Firmicutes	Clostridia	Clostridiales	Hungateiclostridiaceae	Anaerobacterium	1	1	1	1	0	19	19
Bacteria	no rank	Firmicutes	Clostridia	Clostridiales	Hungateiclostridiaceae	Fastidiosipila	1	1	1	1	0	2	2
Bacteria	no rank	Firmicutes	Clostridia	Clostridiales	Hungateiclostridiaceae	Hungateiclostridium	20	19	19	19	1	272	272
Bacteria	no rank	Firmicutes	Clostridia	Clostridiales	Hungateiclostridiaceae	Mageeibacillus	3	3	3	3	0	6	6
Bacteria	no rank	Firmicutes	Clostridia	Clostridiales	Hungateiclostridiaceae	Petroclostridium	1	1	1	1	0	29	29
Bacteria	no rank	Firmicutes	Clostridia	Clostridiales	Hungateiclostridiaceae	Pseudobacteroides	2	2	2	2	0	84	84
Bacteria	no rank	Firmicutes	Clostridia	Clostridiales	Hungateiclostridiaceae	Pseudoclostridium	4	4	4	4	0	68	68
Bacteria	no rank	Firmicutes	Clostridia	Clostridiales	Hungateiclostridiaceae	Ruminiclostridium	10	10	10	10	0	175	175
Bacteria	no rank	Firmicutes	Clostridia	Clostridiales	Hungateiclostridiaceae	Thermoclostridium	4	4	4	4	0	39	39
Bacteria	no rank	Firmicutes	Clostridia	Clostridiales	Hungateiclostridiaceae	no rank	1	1	1	1	1	6	6
Bacteria	no rank	Firmicutes	Clostridia	Clostridiales	Lachnospiraceae	Acetatifactor	1	1	1	1	1	12	12
Bacteria	no rank	Firmicutes	Clostridia	Clostridiales	Lachnospiraceae	Acetitomaculum	1	1	1	1	0	28	28
Bacteria	no rank	Firmicutes	Clostridia	Clostridiales	Lachnospiraceae	Agathobacter	1	1	1	1	0	28	28
Bacteria	no rank	Firmicutes	Clostridia	Clostridiales	Lachnospiraceae	Anaerobium	1	1	1	1	0	21	21
Bacteria	no rank	Firmicutes	Clostridia	Clostridiales	Lachnospiraceae	Anaerobutyricum	11	11	11	11	0	122	122
Bacteria	no rank	Firmicutes	Clostridia	Clostridiales	Lachnospiraceae	Anaerocolumna	4	4	4	4	0	73	73
Bacteria	no rank	Firmicutes	Clostridia	Clostridiales	Lachnospiraceae	Anaerosacchariphilus	1	1	1	1	0	20	20
Bacteria	no rank	Firmicutes	Clostridia	Clostridiales	Lachnospiraceae	Anaerosporobacter	1	1	1	1	0	18	18
Bacteria	no rank	Firmicutes	Clostridia	Clostridiales	Lachnospiraceae	Anaerostipes	21	19	21	19	5	307	298
Bacteria	no rank	Firmicutes	Clostridia	Clostridiales	Lachnospiraceae	Anaerotignum	6	6	6	6	0	69	69
Bacteria	no rank	Firmicutes	Clostridia	Clostridiales	Lachnospiraceae	Bariatricus	1	1	1	1	0	27	27
Bacteria	no rank	Firmicutes	Clostridia	Clostridiales	Lachnospiraceae	Blautia	191	180	191	180	10	2692	2654
Bacteria	no rank	Firmicutes	Clostridia	Clostridiales	Lachnospiraceae	Butyrivibrio	64	59	64	59	5	2997	2969
Bacteria	no rank	Firmicutes	Clostridia	Clostridiales	Lachnospiraceae	Catonella	1	1	1	1	0	17	17
Bacteria	no rank	Firmicutes	Clostridia	Clostridiales	Lachnospiraceae	Cellulosilyticum	4	3	4	3	1	66	66
Bacteria	no rank	Firmicutes	Clostridia	Clostridiales	Lachnospiraceae	Coprococcus	49	42	49	42	5	646	603
Bacteria	no rank	Firmicutes	Clostridia	Clostridiales	Lachnospiraceae	Cuneatibacter	1	1	1	1	0	20	20
Bacteria	no rank	Firmicutes	Clostridia	Clostridiales	Lachnospiraceae	Dorea	63	59	63	59	3	661	638
Bacteria	no rank	Firmicutes	Clostridia	Clostridiales	Lachnospiraceae	Eisenbergiella	14	13	14	13	3	672	672
Bacteria	no rank	Firmicutes	Clostridia	Clostridiales	Lachnospiraceae	Epulopiscium	9	7	9	7	0	158	158
Bacteria	no rank	Firmicutes	Clostridia	Clostridiales	Lachnospiraceae	Extibacter	1	1	1	1	0	21	21
Bacteria	no rank	Firmicutes	Clostridia	Clostridiales	Lachnospiraceae	Faecalicatena	10	10	10	10	2	354	354
Bacteria	no rank	Firmicutes	Clostridia	Clostridiales	Lachnospiraceae	Faecalimonas	2	2	2	2	0	10	10
Bacteria	no rank	Firmicutes	Clostridia	Clostridiales	Lachnospiraceae	Frisingicoccus	1	1	1	1	0	2	2
Bacteria	no rank	Firmicutes	Clostridia	Clostridiales	Lachnospiraceae	Fusicatenibacter	5	5	5	5	0	95	95
Bacteria	no rank	Firmicutes	Clostridia	Clostridiales	Lachnospiraceae	Herbinix	4	4	4	4	1	39	39
Bacteria	no rank	Firmicutes	Clostridia	Clostridiales	Lachnospiraceae	Hespellia	1	1	1	1	0	19	19
Bacteria	no rank	Firmicutes	Clostridia	Clostridiales	Lachnospiraceae	Johnsonella	1	1	1	1	0	3	3
Bacteria	no rank	Firmicutes	Clostridia	Clostridiales	Lachnospiraceae	Kineothrix	2	2	2	2	2	58	58
Bacteria	no rank	Firmicutes	Clostridia	Clostridiales	Lachnospiraceae	Lachnoanaerobaculum	12	12	12	12	0	34	34
Bacteria	no rank	Firmicutes	Clostridia	Clostridiales	Lachnospiraceae	Lachnobacterium	5	5	5	5	0	119	119
Bacteria	no rank	Firmicutes	Clostridia	Clostridiales	Lachnospiraceae	Lachnoclostridium	114	110	114	110	11	3032	3032
Bacteria	no rank	Firmicutes	Clostridia	Clostridiales	Lachnospiraceae	Lachnospira	8	8	8	8	0	191	191
Bacteria	no rank	Firmicutes	Clostridia	Clostridiales	Lachnospiraceae	Lachnotalea	4	4	4	4	0	103	103
Bacteria	no rank	Firmicutes	Clostridia	Clostridiales	Lachnospiraceae	Marvinbryantia	3	3	3	3	0	27	27
Bacteria	no rank	Firmicutes	Clostridia	Clostridiales	Lachnospiraceae	Mediterraneibacter	3	3	3	3	0	30	30
Bacteria	no rank	Firmicutes	Clostridia	Clostridiales	Lachnospiraceae	Merdimonas	2	2	2	2	0	14	14
Bacteria	no rank	Firmicutes	Clostridia	Clostridiales	Lachnospiraceae	Mobilisporobacter	1	1	1	1	0	16	16
Bacteria	no rank	Firmicutes	Clostridia	Clostridiales	Lachnospiraceae	Muricomes	1	1	1	1	0	14	14
Bacteria	no rank	Firmicutes	Clostridia	Clostridiales	Lachnospiraceae	Murimonas	1	1	1	1	0	51	51
Bacteria	no rank	Firmicutes	Clostridia	Clostridiales	Lachnospiraceae	Niameybacter	1	0	1	0	0	24	24
Bacteria	no rank	Firmicutes	Clostridia	Clostridiales	Lachnospiraceae	Oribacterium	13	13	13	13	1	293	293
Bacteria	no rank	Firmicutes	Clostridia	Clostridiales	Lachnospiraceae	Parasporobacterium	1	1	1	1	0	15	15
Bacteria	no rank	Firmicutes	Clostridia	Clostridiales	Lachnospiraceae	Pseudobutyrivibrio	20	18	20	18	2	543	543
Bacteria	no rank	Firmicutes	Clostridia	Clostridiales	Lachnospiraceae	Robinsoniella	6	6	6	6	3	291	291
Bacteria	no rank	Firmicutes	Clostridia	Clostridiales	Lachnospiraceae	Roseburia	77	68	77	68	8	1732	1550
Bacteria	no rank	Firmicutes	Clostridia	Clostridiales	Lachnospiraceae	Schaedlerella	1	1	1	1	0	19	19
Bacteria	no rank	Firmicutes	Clostridia	Clostridiales	Lachnospiraceae	Sellimonas	8	7	8	7	5	72	72
Bacteria	no rank	Firmicutes	Clostridia	Clostridiales	Lachnospiraceae	Shuttleworthia	2	2	2	2	0	6	6
Bacteria	no rank	Firmicutes	Clostridia	Clostridiales	Lachnospiraceae	Stomatobaculum	1	1	1	1	0	5	5
Bacteria	no rank	Firmicutes	Clostridia	Clostridiales	Lachnospiraceae	Tyzzerella	4	4	4	4	3	36	36
Bacteria	no rank	Firmicutes	Clostridia	Clostridiales	Lachnospiraceae	no rank	204	180	201	183	22	3815	3804
Bacteria	no rank	Firmicutes	Clostridia	Clostridiales	Oscillospiraceae	Dysosmobacter	1	1	1	1	1	3	3
Bacteria	no rank	Firmicutes	Clostridia	Clostridiales	Oscillospiraceae	Oscillibacter	14	11	13	12	4	101	92
Bacteria	no rank	Firmicutes	Clostridia	Clostridiales	Oscillospiraceae	no rank	3	3	3	3	2	17	17
Bacteria	no rank	Firmicutes	Clostridia	Clostridiales	Peptococcaceae	Candidatus Desulforudis	2	2	2	2	0	34	34
Bacteria	no rank	Firmicutes	Clostridia	Clostridiales	Peptococcaceae	Candidatus Dichloromethanomonas	1	1	1	1	0	13	13
Bacteria	no rank	Firmicutes	Clostridia	Clostridiales	Peptococcaceae	Dehalobacter	10	10	10	10	0	184	184
Bacteria	no rank	Firmicutes	Clostridia	Clostridiales	Peptococcaceae	Dehalobacterium	1	1	1	1	1	9	9
Bacteria	no rank	Firmicutes	Clostridia	Clostridiales	Peptococcaceae	Desulfallas	4	4	4	4	0	66	66
Bacteria	no rank	Firmicutes	Clostridia	Clostridiales	Peptococcaceae	Desulfitibacter	2	1	2	1	1	42	42
Bacteria	no rank	Firmicutes	Clostridia	Clostridiales	Peptococcaceae	Desulfitobacterium	14	13	14	13	4	380	380
Bacteria	no rank	Firmicutes	Clostridia	Clostridiales	Peptococcaceae	Desulfocucumis	1	1	1	1	1	29	29
Bacteria	no rank	Firmicutes	Clostridia	Clostridiales	Peptococcaceae	Desulfofarcimen	2	2	2	2	1	25	25
Bacteria	no rank	Firmicutes	Clostridia	Clostridiales	Peptococcaceae	Desulfofundulus	5	4	5	4	0	67	67
Bacteria	no rank	Firmicutes	Clostridia	Clostridiales	Peptococcaceae	Desulfohalotomaculum	1	1	1	1	1	13	13
Bacteria	no rank	Firmicutes	Clostridia	Clostridiales	Peptococcaceae	Desulfonispora	1	1	1	1	1	22	22
Bacteria	no rank	Firmicutes	Clostridia	Clostridiales	Peptococcaceae	Desulfosporosinus	20	18	19	19	4	450	450
Bacteria	no rank	Firmicutes	Clostridia	Clostridiales	Peptococcaceae	Desulfotomaculum	16	16	16	16	3	256	256
Bacteria	no rank	Firmicutes	Clostridia	Clostridiales	Peptococcaceae	Desulfurispora	1	1	1	1	0	10	10
Bacteria	no rank	Firmicutes	Clostridia	Clostridiales	Peptococcaceae	Pelotomaculum	9	8	9	8	4	143	143
Bacteria	no rank	Firmicutes	Clostridia	Clostridiales	Peptococcaceae	Peptococcus	1	0	0	1	0	2	2
Bacteria	no rank	Firmicutes	Clostridia	Clostridiales	Peptococcaceae	Syntrophobotulus	1	1	1	1	0	21	21
Bacteria	no rank	Firmicutes	Clostridia	Clostridiales	Peptococcaceae	Thermincola	2	2	2	2	0	36	36
Bacteria	no rank	Firmicutes	Clostridia	Clostridiales	Peptococcaceae	Thermoanaerosceptrum	1	1	1	1	0	22	22
Bacteria	no rank	Firmicutes	Clostridia	Clostridiales	Peptococcaceae	no rank	10	10	10	10	3	146	146
Bacteria	no rank	Firmicutes	Clostridia	Clostridiales	Peptostreptococcaceae	Acetoanaerobium	2	2	2	2	0	69	69
Bacteria	no rank	Firmicutes	Clostridia	Clostridiales	Peptostreptococcaceae	Asaccharospora	1	1	1	1	0	11	11
Bacteria	no rank	Firmicutes	Clostridia	Clostridiales	Peptostreptococcaceae	Clostridioides	1859	1857	1859	1857	31	66641	66632
Bacteria	no rank	Firmicutes	Clostridia	Clostridiales	Peptostreptococcaceae	Criibacterium	2	2	2	2	0	40	40
Bacteria	no rank	Firmicutes	Clostridia	Clostridiales	Peptostreptococcaceae	Filifactor	1	0	0	1	0	1	1
Bacteria	no rank	Firmicutes	Clostridia	Clostridiales	Peptostreptococcaceae	Intestinibacter	6	6	6	6	3	21	21
Bacteria	no rank	Firmicutes	Clostridia	Clostridiales	Peptostreptococcaceae	Paeniclostridium	50	48	50	48	3	586	586
Bacteria	no rank	Firmicutes	Clostridia	Clostridiales	Peptostreptococcaceae	Paraclostridium	10	9	10	9	0	84	84
Bacteria	no rank	Firmicutes	Clostridia	Clostridiales	Peptostreptococcaceae	Peptoanaerobacter	4	4	4	4	0	61	61
Bacteria	no rank	Firmicutes	Clostridia	Clostridiales	Peptostreptococcaceae	Peptoclostridium	4	4	4	4	2	108	108
Bacteria	no rank	Firmicutes	Clostridia	Clostridiales	Peptostreptococcaceae	Peptostreptococcus	13	1	1	13	1	20	20
Bacteria	no rank	Firmicutes	Clostridia	Clostridiales	Peptostreptococcaceae	Proteocatella	1	1	1	1	0	26	26
Bacteria	no rank	Firmicutes	Clostridia	Clostridiales	Peptostreptococcaceae	Romboutsia	11	11	11	11	0	111	111
Bacteria	no rank	Firmicutes	Clostridia	Clostridiales	Peptostreptococcaceae	Tepidibacter	3	3	3	3	0	43	43
Bacteria	no rank	Firmicutes	Clostridia	Clostridiales	Peptostreptococcaceae	Terrisporobacter	5	5	5	5	0	55	55
Bacteria	no rank	Firmicutes	Clostridia	Clostridiales	Peptostreptococcaceae	no rank	13	10	10	13	2	80	80
Bacteria	no rank	Firmicutes	Clostridia	Clostridiales	Proteinivoraceae	Anaerobranca	2	2	2	2	0	20	20
Bacteria	no rank	Firmicutes	Clostridia	Clostridiales	Ruminococcaceae	Acetanaerobacterium	1	1	1	1	0	18	18
Bacteria	no rank	Firmicutes	Clostridia	Clostridiales	Ruminococcaceae	Acetivibrio	2	2	2	2	0	52	52
Bacteria	no rank	Firmicutes	Clostridia	Clostridiales	Ruminococcaceae	Acutalibacter	2	2	2	2	1	11	11
Bacteria	no rank	Firmicutes	Clostridia	Clostridiales	Ruminococcaceae	Agathobaculum	5	5	5	5	0	46	46
Bacteria	no rank	Firmicutes	Clostridia	Clostridiales	Ruminococcaceae	Anaerofilum	1	1	1	1	0	5	5
Bacteria	no rank	Firmicutes	Clostridia	Clostridiales	Ruminococcaceae	Anaerolactibacter	1	1	1	1	0	28	28
Bacteria	no rank	Firmicutes	Clostridia	Clostridiales	Ruminococcaceae	Anaeromassilibacillus	7	7	7	7	0	48	48
Bacteria	no rank	Firmicutes	Clostridia	Clostridiales	Ruminococcaceae	Anaerotruncus	17	17	17	17	0	203	199
Bacteria	no rank	Firmicutes	Clostridia	Clostridiales	Ruminococcaceae	Angelakisella	1	1	1	1	0	10	10
Bacteria	no rank	Firmicutes	Clostridia	Clostridiales	Ruminococcaceae	Bittarella	1	1	1	1	0	14	14
Bacteria	no rank	Firmicutes	Clostridia	Clostridiales	Ruminococcaceae	Candidatus Soleaferrea	1	1	1	1	0	18	18
Bacteria	no rank	Firmicutes	Clostridia	Clostridiales	Ruminococcaceae	Caproiciproducens	2	2	2	2	0	26	26
Bacteria	no rank	Firmicutes	Clostridia	Clostridiales	Ruminococcaceae	Drancourtella	5	5	5	5	0	41	41
Bacteria	no rank	Firmicutes	Clostridia	Clostridiales	Ruminococcaceae	Ethanoligenens	5	5	5	5	0	66	66
Bacteria	no rank	Firmicutes	Clostridia	Clostridiales	Ruminococcaceae	Faecalibacterium	103	90	103	90	18	822	803
Bacteria	no rank	Firmicutes	Clostridia	Clostridiales	Ruminococcaceae	Flavonifractor	28	24	27	25	2	103	103
Bacteria	no rank	Firmicutes	Clostridia	Clostridiales	Ruminococcaceae	Fournierella	3	3	3	3	0	45	45
Bacteria	no rank	Firmicutes	Clostridia	Clostridiales	Ruminococcaceae	Gemmiger	6	6	6	6	0	66	66
Bacteria	no rank	Firmicutes	Clostridia	Clostridiales	Ruminococcaceae	Harryflintia	2	2	2	2	0	36	36
Bacteria	no rank	Firmicutes	Clostridia	Clostridiales	Ruminococcaceae	Hydrogenoanaerobacterium	2	2	2	2	0	30	30
Bacteria	no rank	Firmicutes	Clostridia	Clostridiales	Ruminococcaceae	Marasmitruncus	1	1	1	1	0	18	18
Bacteria	no rank	Firmicutes	Clostridia	Clostridiales	Ruminococcaceae	Massilimaliae	2	2	2	2	0	16	16
Bacteria	no rank	Firmicutes	Clostridia	Clostridiales	Ruminococcaceae	Negativibacillus	2	2	2	2	0	12	12
Bacteria	no rank	Firmicutes	Clostridia	Clostridiales	Ruminococcaceae	Neglecta	3	3	3	3	0	59	59
Bacteria	no rank	Firmicutes	Clostridia	Clostridiales	Ruminococcaceae	Neobitarella	1	1	1	1	0	27	27
Bacteria	no rank	Firmicutes	Clostridia	Clostridiales	Ruminococcaceae	Papillibacter	1	1	1	1	1	12	12
Bacteria	no rank	Firmicutes	Clostridia	Clostridiales	Ruminococcaceae	Phocea	1	1	1	1	0	7	7
Bacteria	no rank	Firmicutes	Clostridia	Clostridiales	Ruminococcaceae	Provencibacterium	2	2	2	2	0	36	36
Bacteria	no rank	Firmicutes	Clostridia	Clostridiales	Ruminococcaceae	Pseudoflavonifractor	9	9	9	9	2	53	53
Bacteria	no rank	Firmicutes	Clostridia	Clostridiales	Ruminococcaceae	Pygmaiobacter	1	1	1	1	0	17	17
Bacteria	no rank	Firmicutes	Clostridia	Clostridiales	Ruminococcaceae	Ruminococcus	230	201	228	203	17	3306	3167
Bacteria	no rank	Firmicutes	Clostridia	Clostridiales	Ruminococcaceae	Ruthenibacterium	10	9	10	9	1	110	110
Bacteria	no rank	Firmicutes	Clostridia	Clostridiales	Ruminococcaceae	Sporobacter	1	1	1	1	0	20	20
Bacteria	no rank	Firmicutes	Clostridia	Clostridiales	Ruminococcaceae	Subdoligranulum	12	11	11	12	0	141	140
Bacteria	no rank	Firmicutes	Clostridia	Clostridiales	Ruminococcaceae	no rank	61	58	61	58	3	848	848
Bacteria	no rank	Firmicutes	Clostridia	Clostridiales	Symbiobacteriaceae	Symbiobacterium	2	1	1	2	0	10	10
Bacteria	no rank	Firmicutes	Clostridia	Clostridiales	Syntrophomonadaceae	Candidatus Syntrophonatronum	1	1	1	1	0	8	8
Bacteria	no rank	Firmicutes	Clostridia	Clostridiales	Syntrophomonadaceae	Dethiobacter	2	2	2	2	0	23	23
Bacteria	no rank	Firmicutes	Clostridia	Clostridiales	Syntrophomonadaceae	Syntrophomonas	4	4	4	4	2	46	46
Bacteria	no rank	Firmicutes	Clostridia	Clostridiales	Syntrophomonadaceae	Syntrophothermus	1	1	1	1	0	11	11
Bacteria	no rank	Firmicutes	Clostridia	Clostridiales	Syntrophomonadaceae	Thermohydrogenium	1	1	1	1	0	5	5
Bacteria	no rank	Firmicutes	Clostridia	Clostridiales	Syntrophomonadaceae	Thermosyntropha	1	1	1	1	0	16	16
Bacteria	no rank	Firmicutes	Clostridia	Clostridiales	Vallitaleaceae	Petrocella	1	1	1	1	0	57	57
Bacteria	no rank	Firmicutes	Clostridia	Clostridiales	Vallitaleaceae	Vallitalea	2	2	2	2	0	53	53
Bacteria	no rank	Firmicutes	Clostridia	Clostridiales	no rank	Anaerovirgula	1	1	1	1	0	19	19
Bacteria	no rank	Firmicutes	Clostridia	Clostridiales	no rank	Evtepia	2	2	2	2	0	6	6
Bacteria	no rank	Firmicutes	Clostridia	Clostridiales	no rank	Fenollaria	2	0	0	2	0	2	2
Bacteria	no rank	Firmicutes	Clostridia	Clostridiales	no rank	Flintibacter	1	1	1	1	0	3	3
Bacteria	no rank	Firmicutes	Clostridia	Clostridiales	no rank	Intestinimonas	8	8	8	8	1	77	77
Bacteria	no rank	Firmicutes	Clostridia	Clostridiales	no rank	Lawsonibacter	1	1	1	1	0	3	3
Bacteria	no rank	Firmicutes	Clostridia	Clostridiales	no rank	Levyella	1	0	0	1	0	1	1
Bacteria	no rank	Firmicutes	Clostridia	Clostridiales	no rank	Monoglobus	1	1	1	1	0	15	15
Bacteria	no rank	Firmicutes	Clostridia	Clostridiales	no rank	Natranaerovirga	2	2	2	2	0	26	26
Bacteria	no rank	Firmicutes	Clostridia	Clostridiales	no rank	Neofamilia	1	0	0	1	0	1	1
Bacteria	no rank	Firmicutes	Clostridia	Clostridiales	no rank	Proteiniborus	2	2	2	2	0	25	25
Bacteria	no rank	Firmicutes	Clostridia	Clostridiales	no rank	no rank	108	81	99	90	13	1439	1426
Bacteria	no rank	Firmicutes	Clostridia	Halanaerobiales	Halanaerobiaceae	Halanaerobium	36	32	36	32	5	799	799
Bacteria	no rank	Firmicutes	Clostridia	Halanaerobiales	Halanaerobiaceae	Halarsenatibacter	1	1	1	1	0	29	29
Bacteria	no rank	Firmicutes	Clostridia	Halanaerobiales	Halanaerobiaceae	Halocella	1	1	1	1	0	10	10
Bacteria	no rank	Firmicutes	Clostridia	Halanaerobiales	Halanaerobiaceae	Halothermothrix	1	1	1	1	0	6	6
Bacteria	no rank	Firmicutes	Clostridia	Halanaerobiales	Halobacteroidaceae	Acetohalobium	1	1	1	1	0	8	8
Bacteria	no rank	Firmicutes	Clostridia	Halanaerobiales	Halobacteroidaceae	Candidatus Frackibacter	4	4	4	4	0	47	47
Bacteria	no rank	Firmicutes	Clostridia	Halanaerobiales	Halobacteroidaceae	Halobacteroides	1	1	1	1	0	8	8
Bacteria	no rank	Firmicutes	Clostridia	Halanaerobiales	Halobacteroidaceae	Halonatronum	1	1	1	1	1	11	11
Bacteria	no rank	Firmicutes	Clostridia	Halanaerobiales	Halobacteroidaceae	Orenia	5	5	5	5	0	93	93
Bacteria	no rank	Firmicutes	Clostridia	Halanaerobiales	Halobacteroidaceae	Selenihalanaerobacter	1	1	1	1	0	16	16
Bacteria	no rank	Firmicutes	Clostridia	Halanaerobiales	no rank	Anoxybacter	1	1	1	1	0	11	11
Bacteria	no rank	Firmicutes	Clostridia	Natranaerobiales	Natranaerobiaceae	Natranaerobius	2	2	2	2	0	25	25
Bacteria	no rank	Firmicutes	Clostridia	Thermoanaerobacterales	Thermoanaerobacteraceae	Ammonifex	3	3	3	3	0	26	26
Bacteria	no rank	Firmicutes	Clostridia	Thermoanaerobacterales	Thermoanaerobacteraceae	Brockia	2	2	2	2	0	10	10
Bacteria	no rank	Firmicutes	Clostridia	Thermoanaerobacterales	Thermoanaerobacteraceae	Caldanaerobacter	6	5	6	5	0	34	34
Bacteria	no rank	Firmicutes	Clostridia	Thermoanaerobacterales	Thermoanaerobacteraceae	Caldanaerobius	2	2	2	2	0	19	19
Bacteria	no rank	Firmicutes	Clostridia	Thermoanaerobacterales	Thermoanaerobacteraceae	Calderihabitans	1	1	1	1	0	11	11
Bacteria	no rank	Firmicutes	Clostridia	Thermoanaerobacterales	Thermoanaerobacteraceae	Carboxydothermus	4	4	4	4	0	63	63
Bacteria	no rank	Firmicutes	Clostridia	Thermoanaerobacterales	Thermoanaerobacteraceae	Desulfovirgula	1	1	1	1	0	19	19
Bacteria	no rank	Firmicutes	Clostridia	Thermoanaerobacterales	Thermoanaerobacteraceae	Fervidicola	1	1	1	1	0	6	6
Bacteria	no rank	Firmicutes	Clostridia	Thermoanaerobacterales	Thermoanaerobacteraceae	Moorella	26	26	26	26	12	331	329
Bacteria	no rank	Firmicutes	Clostridia	Thermoanaerobacterales	Thermoanaerobacteraceae	Tepidanaerobacter	3	3	3	3	2	26	26
Bacteria	no rank	Firmicutes	Clostridia	Thermoanaerobacterales	Thermoanaerobacteraceae	Thermacetogenium	3	3	3	3	0	30	30
Bacteria	no rank	Firmicutes	Clostridia	Thermoanaerobacterales	Thermoanaerobacteraceae	Thermanaeromonas	1	0	1	0	0	22	22
Bacteria	no rank	Firmicutes	Clostridia	Thermoanaerobacterales	Thermoanaerobacteraceae	Thermoanaerobacter	21	20	21	20	1	131	130
Bacteria	no rank	Firmicutes	Clostridia	Thermoanaerobacterales	Thermoanaerobacteraceae	Thermodesulfitimonas	1	1	1	1	0	14	14
Bacteria	no rank	Firmicutes	Clostridia	Thermoanaerobacterales	Thermoanaerobacteraceae	no rank	1	1	1	1	0	17	17
Bacteria	no rank	Firmicutes	Clostridia	Thermoanaerobacterales	Thermoanaerobacterales Family III. Incertae Sedis	Caldanaerovirga	1	1	1	1	0	7	7
Bacteria	no rank	Firmicutes	Clostridia	Thermoanaerobacterales	Thermoanaerobacterales Family III. Incertae Sedis	Caldicellulosiruptor	36	36	36	36	0	304	304
Bacteria	no rank	Firmicutes	Clostridia	Thermoanaerobacterales	Thermoanaerobacterales Family III. Incertae Sedis	Syntrophaceticus	1	1	1	1	0	11	11
Bacteria	no rank	Firmicutes	Clostridia	Thermoanaerobacterales	Thermoanaerobacterales Family III. Incertae Sedis	Thermoanaerobacterium	12	11	12	11	0	77	77
Bacteria	no rank	Firmicutes	Clostridia	Thermoanaerobacterales	Thermoanaerobacterales Family III. Incertae Sedis	Thermosediminibacter	1	1	1	1	0	5	5
Bacteria	no rank	Firmicutes	Clostridia	Thermoanaerobacterales	Thermoanaerobacterales Family III. Incertae Sedis	Thermovenabulum	1	1	1	1	0	6	6
Bacteria	no rank	Firmicutes	Clostridia	Thermoanaerobacterales	Thermoanaerobacterales Family IV. Incertae Sedis	Mahella	1	1	1	1	0	15	15
Bacteria	no rank	Firmicutes	Clostridia	Thermoanaerobacterales	Thermodesulfobiaceae	Thermodesulfobium	3	1	3	1	0	58	58
Bacteria	no rank	Firmicutes	Clostridia	Thermoanaerobacterales	no rank	no rank	2	2	2	2	0	30	30
Bacteria	no rank	Firmicutes	Clostridia	no rank	no rank	no rank	22	15	20	17	1	234	234
Bacteria	no rank	Firmicutes	Erysipelotrichia	Erysipelotrichales	Erysipelotrichaceae	Absiella	11	7	7	10	7	305	305
Bacteria	no rank	Firmicutes	Erysipelotrichia	Erysipelotrichales	Erysipelotrichaceae	Allobaculum	1	0	0	1	0	1	1
Bacteria	no rank	Firmicutes	Erysipelotrichia	Erysipelotrichales	Erysipelotrichaceae	Breznakia	1	1	1	1	0	3	3
Bacteria	no rank	Firmicutes	Erysipelotrichia	Erysipelotrichales	Erysipelotrichaceae	Candidatus Stoquefichus	3	1	3	1	2	112	112
Bacteria	no rank	Firmicutes	Erysipelotrichia	Erysipelotrichales	Erysipelotrichaceae	Catenibacterium	6	4	5	5	0	11	10
Bacteria	no rank	Firmicutes	Erysipelotrichia	Erysipelotrichales	Erysipelotrichaceae	Coprobacillus	52	46	49	49	10	942	914
Bacteria	no rank	Firmicutes	Erysipelotrichia	Erysipelotrichales	Erysipelotrichaceae	Dielma	5	4	5	4	0	154	154
Bacteria	no rank	Firmicutes	Erysipelotrichia	Erysipelotrichales	Erysipelotrichaceae	Dubosiella	1	1	1	1	0	2	2
Bacteria	no rank	Firmicutes	Erysipelotrichia	Erysipelotrichales	Erysipelotrichaceae	Eggerthia	3	1	1	3	0	4	4
Bacteria	no rank	Firmicutes	Erysipelotrichia	Erysipelotrichales	Erysipelotrichaceae	Erysipelatoclostridium	36	36	36	36	5	817	817
Bacteria	no rank	Firmicutes	Erysipelotrichia	Erysipelotrichales	Erysipelotrichaceae	Erysipelothrix	14	1	1	14	1	18	18
Bacteria	no rank	Firmicutes	Erysipelotrichia	Erysipelotrichales	Erysipelotrichaceae	Faecalibacillus	2	2	2	2	0	32	32
Bacteria	no rank	Firmicutes	Erysipelotrichia	Erysipelotrichales	Erysipelotrichaceae	Faecalibaculum	2	0	0	2	0	2	2
Bacteria	no rank	Firmicutes	Erysipelotrichia	Erysipelotrichales	Erysipelotrichaceae	Faecalicoccus	3	0	0	3	0	3	3
Bacteria	no rank	Firmicutes	Erysipelotrichia	Erysipelotrichales	Erysipelotrichaceae	Faecalitalea	5	2	2	5	0	9	9
Bacteria	no rank	Firmicutes	Erysipelotrichia	Erysipelotrichales	Erysipelotrichaceae	Galactobacillus	1	0	1	0	0	4	4
Bacteria	no rank	Firmicutes	Erysipelotrichia	Erysipelotrichales	Erysipelotrichaceae	Holdemanella	7	7	7	7	1	91	91
Bacteria	no rank	Firmicutes	Erysipelotrichia	Erysipelotrichales	Erysipelotrichaceae	Holdemania	6	5	6	5	0	154	154
Bacteria	no rank	Firmicutes	Erysipelotrichia	Erysipelotrichales	Erysipelotrichaceae	Ileibacterium	1	0	0	1	0	1	1
Bacteria	no rank	Firmicutes	Erysipelotrichia	Erysipelotrichales	Erysipelotrichaceae	Intestinibaculum	1	1	1	1	0	36	36
Bacteria	no rank	Firmicutes	Erysipelotrichia	Erysipelotrichales	Erysipelotrichaceae	Kandleria	8	8	8	8	0	105	105
Bacteria	no rank	Firmicutes	Erysipelotrichia	Erysipelotrichales	Erysipelotrichaceae	Lactimicrobium	1	1	1	1	0	16	16
Bacteria	no rank	Firmicutes	Erysipelotrichia	Erysipelotrichales	Erysipelotrichaceae	Longibaculum	2	2	2	2	2	55	55
Bacteria	no rank	Firmicutes	Erysipelotrichia	Erysipelotrichales	Erysipelotrichaceae	Longicatena	1	1	1	1	0	19	19
Bacteria	no rank	Firmicutes	Erysipelotrichia	Erysipelotrichales	Erysipelotrichaceae	Massilicoli	1	0	0	1	1	2	2
Bacteria	no rank	Firmicutes	Erysipelotrichia	Erysipelotrichales	Erysipelotrichaceae	Massilimicrobiota	7	6	6	7	1	33	33
Bacteria	no rank	Firmicutes	Erysipelotrichia	Erysipelotrichales	Erysipelotrichaceae	Merdibacter	1	0	0	1	0	1	1
Bacteria	no rank	Firmicutes	Erysipelotrichia	Erysipelotrichales	Erysipelotrichaceae	Solobacterium	4	0	0	4	0	4	4
Bacteria	no rank	Firmicutes	Erysipelotrichia	Erysipelotrichales	Erysipelotrichaceae	Traorella	1	1	1	1	0	2	2
Bacteria	no rank	Firmicutes	Erysipelotrichia	Erysipelotrichales	Erysipelotrichaceae	Turicibacter	10	10	10	10	0	83	83
Bacteria	no rank	Firmicutes	Erysipelotrichia	Erysipelotrichales	Erysipelotrichaceae	no rank	28	22	23	27	2	548	541
Bacteria	no rank	Firmicutes	Erysipelotrichia	Erysipelotrichales	no rank	no rank	1	1	1	1	0	8	8
Bacteria	no rank	Firmicutes	Limnochordia	Limnochordales	Limnochordaceae	Limnochorda	1	1	1	1	0	6	6
Bacteria	no rank	Firmicutes	Negativicutes	Acidaminococcales	Acidaminococcaceae	Acidaminococcus	18	14	14	18	1	86	76
Bacteria	no rank	Firmicutes	Negativicutes	Acidaminococcales	Acidaminococcaceae	Phascolarctobacterium	28	4	4	28	1	114	97
Bacteria	no rank	Firmicutes	Negativicutes	Acidaminococcales	Acidaminococcaceae	Succiniclasticum	2	1	1	2	0	42	42
Bacteria	no rank	Firmicutes	Negativicutes	Acidaminococcales	Acidaminococcaceae	Succinispira	1	1	1	1	0	22	22
Bacteria	no rank	Firmicutes	Negativicutes	Acidaminococcales	Acidaminococcaceae	no rank	1	1	1	1	0	5	5
Bacteria	no rank	Firmicutes	Negativicutes	Selenomonadales	Selenomonadaceae	Anaerovibrio	5	5	5	5	0	81	81
Bacteria	no rank	Firmicutes	Negativicutes	Selenomonadales	Selenomonadaceae	Centipeda	1	1	1	1	0	8	8
Bacteria	no rank	Firmicutes	Negativicutes	Selenomonadales	Selenomonadaceae	Megamonas	15	5	5	15	1	21	21
Bacteria	no rank	Firmicutes	Negativicutes	Selenomonadales	Selenomonadaceae	Mitsuokella	9	9	9	9	2	149	149
Bacteria	no rank	Firmicutes	Negativicutes	Selenomonadales	Selenomonadaceae	Pectinatus	1	1	1	1	0	10	10
Bacteria	no rank	Firmicutes	Negativicutes	Selenomonadales	Selenomonadaceae	Propionispira	2	2	2	2	0	45	45
Bacteria	no rank	Firmicutes	Negativicutes	Selenomonadales	Selenomonadaceae	Schwartzia	1	1	1	1	0	17	17
Bacteria	no rank	Firmicutes	Negativicutes	Selenomonadales	Selenomonadaceae	Selenomonas	41	40	40	41	5	484	484
Bacteria	no rank	Firmicutes	Negativicutes	Selenomonadales	Sporomusaceae	Acetonema	1	1	1	1	0	16	16
Bacteria	no rank	Firmicutes	Negativicutes	Selenomonadales	Sporomusaceae	Anaeroarcus	1	1	1	1	0	53	53
Bacteria	no rank	Firmicutes	Negativicutes	Selenomonadales	Sporomusaceae	Anaeromusa	1	1	1	1	0	56	56
Bacteria	no rank	Firmicutes	Negativicutes	Selenomonadales	Sporomusaceae	Anaerospora	1	1	1	1	0	36	36
Bacteria	no rank	Firmicutes	Negativicutes	Selenomonadales	Sporomusaceae	Anaerosporomusa	1	1	1	1	0	33	33
Bacteria	no rank	Firmicutes	Negativicutes	Selenomonadales	Sporomusaceae	Dendrosporobacter	1	1	1	1	0	22	22
Bacteria	no rank	Firmicutes	Negativicutes	Selenomonadales	Sporomusaceae	Methylomusa	1	1	1	1	0	17	17
Bacteria	no rank	Firmicutes	Negativicutes	Selenomonadales	Sporomusaceae	Pelosinus	8	8	8	8	0	226	226
Bacteria	no rank	Firmicutes	Negativicutes	Selenomonadales	Sporomusaceae	Propionispora	3	2	2	3	0	59	59
Bacteria	no rank	Firmicutes	Negativicutes	Selenomonadales	Sporomusaceae	Sporolituus	1	1	1	1	0	10	10
Bacteria	no rank	Firmicutes	Negativicutes	Selenomonadales	Sporomusaceae	Sporomusa	12	11	12	11	0	450	422
Bacteria	no rank	Firmicutes	Negativicutes	Selenomonadales	Sporomusaceae	Thermosinus	1	1	1	1	0	7	7
Bacteria	no rank	Firmicutes	Negativicutes	Selenomonadales	Sporomusaceae	no rank	2	2	2	2	0	70	70
Bacteria	no rank	Firmicutes	Negativicutes	Selenomonadales	no rank	no rank	1	0	0	1	0	1	1
Bacteria	no rank	Firmicutes	Negativicutes	Veillonellales	Veillonellaceae	Allisonella	1	1	1	1	0	20	20
Bacteria	no rank	Firmicutes	Negativicutes	Veillonellales	Veillonellaceae	Anaeroglobus	1	0	0	1	0	1	1
Bacteria	no rank	Firmicutes	Negativicutes	Veillonellales	Veillonellaceae	Caecibacter	1	1	1	1	0	2	2
Bacteria	no rank	Firmicutes	Negativicutes	Veillonellales	Veillonellaceae	Colibacter	2	0	0	2	0	2	2
Bacteria	no rank	Firmicutes	Negativicutes	Veillonellales	Veillonellaceae	Dialister	12	5	6	11	1	70	56
Bacteria	no rank	Firmicutes	Negativicutes	Veillonellales	Veillonellaceae	Lucifera	1	1	1	1	1	28	28
Bacteria	no rank	Firmicutes	Negativicutes	Veillonellales	Veillonellaceae	Massilibacillus	1	1	1	1	0	21	21
Bacteria	no rank	Firmicutes	Negativicutes	Veillonellales	Veillonellaceae	Megasphaera	38	29	31	36	1	176	170
Bacteria	no rank	Firmicutes	Negativicutes	Veillonellales	Veillonellaceae	Veillonella	81	1	1	78	15	95	95
Bacteria	no rank	Firmicutes	Negativicutes	Veillonellales	Veillonellaceae	no rank	15	6	6	15	1	72	72
Bacteria	no rank	Firmicutes	Tissierellia	Tissierellales	Gottschalkiaceae	Andreesenia	1	1	1	1	0	27	27
Bacteria	no rank	Firmicutes	Tissierellia	Tissierellales	Gottschalkiaceae	Gottschalkia	2	2	2	2	0	18	18
Bacteria	no rank	Firmicutes	Tissierellia	Tissierellales	Gottschalkiaceae	no rank	1	0	1	0	0	7	7
Bacteria	no rank	Firmicutes	Tissierellia	Tissierellales	Peptoniphilaceae	Anaerococcus	34	0	0	34	4	38	38
Bacteria	no rank	Firmicutes	Tissierellia	Tissierellales	Peptoniphilaceae	Anaerosphaera	3	0	0	3	0	3	3
Bacteria	no rank	Firmicutes	Tissierellia	Tissierellales	Peptoniphilaceae	Finegoldia	27	0	0	27	0	27	27
Bacteria	no rank	Firmicutes	Tissierellia	Tissierellales	Peptoniphilaceae	Helcococcus	7	0	0	7	0	7	7
Bacteria	no rank	Firmicutes	Tissierellia	Tissierellales	Peptoniphilaceae	Khoudiadiopia	1	0	0	1	0	1	1
Bacteria	no rank	Firmicutes	Tissierellia	Tissierellales	Peptoniphilaceae	Lagierella	2	0	0	2	0	2	2
Bacteria	no rank	Firmicutes	Tissierellia	Tissierellales	Peptoniphilaceae	Miniphocibacter	1	1	1	1	0	2	2
Bacteria	no rank	Firmicutes	Tissierellia	Tissierellales	Peptoniphilaceae	Murdochiella	4	2	2	4	0	6	6
Bacteria	no rank	Firmicutes	Tissierellia	Tissierellales	Peptoniphilaceae	Parvimonas	11	7	7	11	0	18	18
Bacteria	no rank	Firmicutes	Tissierellia	Tissierellales	Peptoniphilaceae	Peptoniphilus	41	7	7	40	4	51	51
Bacteria	no rank	Firmicutes	Tissierellia	Tissierellales	Peptoniphilaceae	Urinicoccus	2	0	0	2	0	2	2
Bacteria	no rank	Firmicutes	Tissierellia	Tissierellales	Peptoniphilaceae	no rank	4	0	0	4	0	4	4
Bacteria	no rank	Firmicutes	Tissierellia	Tissierellales	Tissierellaceae	Anaerosalibacter	3	3	3	3	0	15	15
Bacteria	no rank	Firmicutes	Tissierellia	Tissierellales	Tissierellaceae	Soehngenia	2	2	2	2	0	26	26
Bacteria	no rank	Firmicutes	Tissierellia	Tissierellales	Tissierellaceae	Tissierella	6	6	6	6	0	84	84
Bacteria	no rank	Firmicutes	Tissierellia	Tissierellales	Tissierellaceae	no rank	2	2	2	2	0	18	18
Bacteria	no rank	Firmicutes	Tissierellia	Tissierellales	no rank	Sporanaerobacter	4	4	4	4	0	28	28
Bacteria	no rank	Firmicutes	Tissierellia	no rank	no rank	Dethiosulfatibacter	1	1	1	1	0	22	22
Bacteria	no rank	Firmicutes	Tissierellia	no rank	no rank	Ezakiella	2	0	0	2	0	2	2
Bacteria	no rank	Firmicutes	Tissierellia	no rank	no rank	Kallipyga	2	0	0	2	0	2	2
Bacteria	no rank	Firmicutes	Tissierellia	no rank	no rank	Sedimentibacter	3	3	3	3	2	58	58
Bacteria	no rank	Firmicutes	Tissierellia	no rank	no rank	Tepidimicrobium	1	1	1	1	0	12	12
Bacteria	no rank	Firmicutes	Tissierellia	no rank	no rank	no rank	6	0	0	6	0	7	7
Bacteria	no rank	Firmicutes	no rank	no rank	no rank	Hydrogenispora	1	1	1	1	0	39	39
Bacteria	no rank	Firmicutes	no rank	no rank	no rank	Ndongobacter	1	1	1	1	1	3	3
Bacteria	no rank	Firmicutes	no rank	no rank	no rank	no rank	131	100	125	106	12	1731	1460
Bacteria	no rank	Fusobacteria	Fusobacteriia	Fusobacteriales	Fusobacteriaceae	Cetobacterium	5	5	5	5	1	61	61
Bacteria	no rank	Fusobacteria	Fusobacteriia	Fusobacteriales	Fusobacteriaceae	Fusobacterium	181	26	26	181	6	453	436
Bacteria	no rank	Fusobacteria	Fusobacteriia	Fusobacteriales	Fusobacteriaceae	Hypnocyclicus	1	1	1	1	0	28	28
Bacteria	no rank	Fusobacteria	Fusobacteriia	Fusobacteriales	Fusobacteriaceae	Ilyobacter	1	1	1	1	0	30	30
Bacteria	no rank	Fusobacteria	Fusobacteriia	Fusobacteriales	Fusobacteriaceae	Psychrilyobacter	3	2	3	2	2	109	109
Bacteria	no rank	Fusobacteria	Fusobacteriia	Fusobacteriales	Leptotrichiaceae	Caviibacter	2	0	0	2	0	2	2
Bacteria	no rank	Fusobacteria	Fusobacteriia	Fusobacteriales	Leptotrichiaceae	Leptotrichia	28	0	0	28	0	28	28
Bacteria	no rank	Fusobacteria	Fusobacteriia	Fusobacteriales	Leptotrichiaceae	Oceanivirga	1	0	0	1	1	2	2
Bacteria	no rank	Fusobacteria	Fusobacteriia	Fusobacteriales	Leptotrichiaceae	Sebaldella	2	0	0	2	0	2	2
Bacteria	no rank	Fusobacteria	Fusobacteriia	Fusobacteriales	Leptotrichiaceae	Sneathia	2	0	0	2	0	2	2
Bacteria	no rank	Fusobacteria	Fusobacteriia	Fusobacteriales	Leptotrichiaceae	Streptobacillus	30	0	0	30	1	31	31
Bacteria	no rank	Fusobacteria	Fusobacteriia	no rank	no rank	no rank	2	1	2	1	0	15	15
Bacteria	no rank	Fusobacteria	no rank	no rank	no rank	no rank	1	0	0	1	0	1	1
Bacteria	no rank	Gemmatimonadetes	Gemmatimonadetes	Gemmatimonadales	Gemmatimonadaceae	Gemmatimonas	8	4	8	4	0	46	46
Bacteria	no rank	Gemmatimonadetes	Gemmatimonadetes	Gemmatimonadales	Gemmatimonadaceae	Gemmatirosa	1	1	1	1	0	22	22
Bacteria	no rank	Gemmatimonadetes	Gemmatimonadetes	Gemmatimonadales	Gemmatimonadaceae	no rank	1	0	1	0	0	8	8
Bacteria	no rank	Gemmatimonadetes	Gemmatimonadetes	Gemmatimonadales	no rank	no rank	11	5	11	5	0	63	63
Bacteria	no rank	Gemmatimonadetes	no rank	no rank	no rank	no rank	92	49	90	51	0	846	846
Bacteria	no rank	Ignavibacteriae	Ignavibacteria	Ignavibacteriales	Ignavibacteriaceae	Ignavibacterium	1	1	1	1	0	2	2
Bacteria	no rank	Ignavibacteriae	Ignavibacteria	Ignavibacteriales	Melioribacteraceae	Melioribacter	1	1	1	1	0	2	2
Bacteria	no rank	Ignavibacteriae	Ignavibacteria	Ignavibacteriales	no rank	no rank	13	10	13	10	0	24	24
Bacteria	no rank	Ignavibacteriae	Ignavibacteria	no rank	no rank	no rank	27	11	21	17	5	45	45
Bacteria	no rank	Ignavibacteriae	no rank	no rank	no rank	no rank	10	7	9	8	1	22	22
Bacteria	no rank	Kiritimatiellaeota	Kiritimatiellae	Kiritimatiellales	Kiritimatiellaceae	Kiritimatiella	1	1	1	1	0	3	3
Bacteria	no rank	Kiritimatiellaeota	Kiritimatiellae	Kiritimatiellales	Kiritimatiellaceae	no rank	2	2	2	2	0	5	5
Bacteria	no rank	Kiritimatiellaeota	Kiritimatiellae	Kiritimatiellales	no rank	no rank	2	2	2	2	0	6	6
Bacteria	no rank	Lentisphaerae	Lentisphaeria	Lentisphaerales	Lentisphaeraceae	Lentisphaera	1	0	0	1	1	2	2
Bacteria	no rank	Lentisphaerae	Lentisphaeria	Lentisphaerales	no rank	no rank	1	1	1	1	0	4	4
Bacteria	no rank	Lentisphaerae	Lentisphaeria	Victivallales	Victivallaceae	Victivallis	2	0	0	2	0	2	2
Bacteria	no rank	Lentisphaerae	Lentisphaeria	Victivallales	no rank	no rank	1	0	0	1	0	1	1
Bacteria	no rank	Lentisphaerae	no rank	no rank	no rank	no rank	12	10	11	11	1	28	28
Bacteria	no rank	Nitrospinae	Nitrospinia	Nitrospinales	Nitrospinaceae	Nitrospina	6	0	6	0	0	38	38
Bacteria	no rank	Nitrospinae	no rank	no rank	no rank	no rank	11	4	11	4	0	72	72
Bacteria	no rank	Nitrospirae	Nitrospira	Nitrospirales	Nitrospiraceae	Candidatus Magnetobacterium	1	0	1	0	0	24	24
Bacteria	no rank	Nitrospirae	Nitrospira	Nitrospirales	Nitrospiraceae	Candidatus Sulfobium	1	0	1	0	0	16	16
Bacteria	no rank	Nitrospirae	Nitrospira	Nitrospirales	Nitrospiraceae	Leptospirillum	12	10	12	10	0	266	252
Bacteria	no rank	Nitrospirae	Nitrospira	Nitrospirales	Nitrospiraceae	Nitrospira	39	0	39	0	6	229	229
Bacteria	no rank	Nitrospirae	Nitrospira	Nitrospirales	Nitrospiraceae	Thermodesulfovibrio	9	7	9	7	0	74	74
Bacteria	no rank	Nitrospirae	Nitrospira	Nitrospirales	Nitrospiraceae	no rank	8	5	8	5	1	135	135
Bacteria	no rank	Nitrospirae	Nitrospira	Nitrospirales	no rank	no rank	3	1	3	1	0	30	30
Bacteria	no rank	Nitrospirae	Nitrospira	no rank	no rank	no rank	5	5	5	5	0	41	41
Bacteria	no rank	Nitrospirae	no rank	no rank	no rank	no rank	92	27	92	27	2	633	633
Bacteria	no rank	Planctomycetes	Candidatus Brocadiae	Candidatus Brocadiales	Candidatus Brocadiaceae	Candidatus Brocadia	11	8	11	8	1	143	143
Bacteria	no rank	Planctomycetes	Candidatus Brocadiae	Candidatus Brocadiales	Candidatus Brocadiaceae	Candidatus Jettenia	2	2	2	2	0	20	20
Bacteria	no rank	Planctomycetes	Candidatus Brocadiae	Candidatus Brocadiales	Candidatus Brocadiaceae	Candidatus Kuenenia	2	1	2	1	0	28	28
Bacteria	no rank	Planctomycetes	Candidatus Brocadiae	Candidatus Brocadiales	Candidatus Brocadiaceae	Candidatus Scalindua	4	4	4	4	0	39	39
Bacteria	no rank	Planctomycetes	Candidatus Brocadiae	Candidatus Brocadiales	Candidatus Brocadiaceae	no rank	2	1	2	1	0	21	21
Bacteria	no rank	Planctomycetes	Candidatus Brocadiae	no rank	no rank	no rank	1	1	1	1	0	2	2
Bacteria	no rank	Planctomycetes	Phycisphaerae	Phycisphaerales	Phycisphaeraceae	Phycisphaera	6	5	6	5	0	26	26
Bacteria	no rank	Planctomycetes	Phycisphaerae	Phycisphaerales	Phycisphaeraceae	no rank	4	3	4	3	0	17	17
Bacteria	no rank	Planctomycetes	Phycisphaerae	Phycisphaerales	no rank	no rank	5	5	5	5	0	23	23
Bacteria	no rank	Planctomycetes	Phycisphaerae	Sedimentisphaerales	Anaerohalosphaeraceae	Anaerohalosphaera	1	1	1	1	0	3	3
Bacteria	no rank	Planctomycetes	Phycisphaerae	Sedimentisphaerales	Sedimentisphaeraceae	Limihaloglobus	1	1	1	1	0	2	2
Bacteria	no rank	Planctomycetes	Phycisphaerae	Sedimentisphaerales	Sedimentisphaeraceae	Sedimentisphaera	3	3	3	3	0	6	6
Bacteria	no rank	Planctomycetes	Phycisphaerae	no rank	no rank	no rank	5	4	5	4	2	26	26
Bacteria	no rank	Planctomycetes	Planctomycetia	Gemmatales	Gemmataceae	Fimbriiglobus	1	1	1	1	0	4	4
Bacteria	no rank	Planctomycetes	Planctomycetia	Gemmatales	Gemmataceae	Gemmata	4	4	4	4	0	15	15
Bacteria	no rank	Planctomycetes	Planctomycetia	Gemmatales	Gemmataceae	Zavarzinella	1	1	1	1	1	11	11
Bacteria	no rank	Planctomycetes	Planctomycetia	Isosphaerales	Isosphaeraceae	Aquisphaera	1	1	1	1	0	13	13
Bacteria	no rank	Planctomycetes	Planctomycetia	Isosphaerales	Isosphaeraceae	Isosphaera	1	1	1	1	0	5	5
Bacteria	no rank	Planctomycetes	Planctomycetia	Isosphaerales	Isosphaeraceae	Paludisphaera	1	1	1	1	0	7	7
Bacteria	no rank	Planctomycetes	Planctomycetia	Isosphaerales	Isosphaeraceae	Singulisphaera	3	3	3	3	0	30	30
Bacteria	no rank	Planctomycetes	Planctomycetia	Isosphaerales	Isosphaeraceae	Tautonia	1	1	1	1	0	8	8
Bacteria	no rank	Planctomycetes	Planctomycetia	Pirellulales	Lacipirellulaceae	Bythopirellula	1	1	1	1	1	9	9
Bacteria	no rank	Planctomycetes	Planctomycetia	Pirellulales	Lacipirellulaceae	no rank	1	1	1	1	0	9	9
Bacteria	no rank	Planctomycetes	Planctomycetia	Pirellulales	Pirellulaceae	Blastopirellula	10	9	10	9	3	114	114
Bacteria	no rank	Planctomycetes	Planctomycetia	Pirellulales	Pirellulaceae	Mariniblastus	2	2	2	2	0	26	26
Bacteria	no rank	Planctomycetes	Planctomycetia	Pirellulales	Pirellulaceae	Pirellula	2	2	2	2	0	16	16
Bacteria	no rank	Planctomycetes	Planctomycetia	Pirellulales	Pirellulaceae	Rhodopirellula	16	15	16	15	5	151	150
Bacteria	no rank	Planctomycetes	Planctomycetia	Pirellulales	Pirellulaceae	Roseimaritima	2	2	2	2	0	24	24
Bacteria	no rank	Planctomycetes	Planctomycetia	Pirellulales	Pirellulaceae	Rubripirellula	2	2	2	2	2	19	19
Bacteria	no rank	Planctomycetes	Planctomycetia	Pirellulales	Thermoguttaceae	Thermogutta	1	1	1	1	0	6	6
Bacteria	no rank	Planctomycetes	Planctomycetia	Planctomycetales	Planctomycetaceae	Fuerstia	1	1	1	1	0	8	8
Bacteria	no rank	Planctomycetes	Planctomycetia	Planctomycetales	Planctomycetaceae	Gimesia	4	0	3	1	0	15	15
Bacteria	no rank	Planctomycetes	Planctomycetia	Planctomycetales	Planctomycetaceae	Planctomicrobium	1	1	1	1	0	9	9
Bacteria	no rank	Planctomycetes	Planctomycetia	Planctomycetales	Planctomycetaceae	Planctomyces	2	2	2	2	0	17	17
Bacteria	no rank	Planctomycetes	Planctomycetia	Planctomycetales	Planctomycetaceae	Planctopirus	3	3	3	3	0	18	18
Bacteria	no rank	Planctomycetes	Planctomycetia	Planctomycetales	Planctomycetaceae	Rubinisphaera	1	1	1	1	0	5	5
Bacteria	no rank	Planctomycetes	Planctomycetia	Planctomycetales	Planctomycetaceae	Schlesneria	1	1	1	1	1	8	8
Bacteria	no rank	Planctomycetes	Planctomycetia	Planctomycetales	Planctomycetaceae	no rank	13	7	9	11	1	29	29
Bacteria	no rank	Planctomycetes	Planctomycetia	Planctomycetales	no rank	no rank	5	3	5	3	0	20	20
Bacteria	no rank	Planctomycetes	Planctomycetia	no rank	no rank	no rank	2	1	2	1	0	9	9
Bacteria	no rank	Planctomycetes	no rank	no rank	no rank	no rank	227	163	214	176	12	1285	1285
Bacteria	no rank	Proteobacteria	Acidithiobacillia	Acidithiobacillales	Acidithiobacillaceae	Acidithiobacillus	42	0	42	0	3	620	620
Bacteria	no rank	Proteobacteria	Acidithiobacillia	Acidithiobacillales	Thermithiobacillaceae	Thermithiobacillus	1	0	1	0	0	16	16
Bacteria	no rank	Proteobacteria	Acidithiobacillia	Acidithiobacillales	no rank	no rank	3	0	3	0	0	34	34
Bacteria	no rank	Proteobacteria	Alphaproteobacteria	Caulobacterales	Caulobacteraceae	Aquidulcibacter	1	0	1	0	0	6	6
Bacteria	no rank	Proteobacteria	Alphaproteobacteria	Caulobacterales	Caulobacteraceae	Asticcacaulis	13	0	13	0	2	187	187
Bacteria	no rank	Proteobacteria	Alphaproteobacteria	Caulobacterales	Caulobacteraceae	Brevundimonas	77	0	77	0	15	500	500
Bacteria	no rank	Proteobacteria	Alphaproteobacteria	Caulobacterales	Caulobacteraceae	Caulobacter	56	1	56	1	7	556	556
Bacteria	no rank	Proteobacteria	Alphaproteobacteria	Caulobacterales	Caulobacteraceae	Phenylobacterium	24	0	24	0	6	165	165
Bacteria	no rank	Proteobacteria	Alphaproteobacteria	Caulobacterales	Caulobacteraceae	Woodsholea	1	0	1	0	0	5	5
Bacteria	no rank	Proteobacteria	Alphaproteobacteria	Caulobacterales	Caulobacteraceae	no rank	5	0	5	0	0	30	30
Bacteria	no rank	Proteobacteria	Alphaproteobacteria	Caulobacterales	no rank	no rank	8	0	8	0	1	33	33
Bacteria	no rank	Proteobacteria	Alphaproteobacteria	Emcibacterales	Emcibacteraceae	Emcibacter	4	0	4	0	0	41	41
Bacteria	no rank	Proteobacteria	Alphaproteobacteria	Holosporales	Caedimonadaceae	Caedimonas	1	0	1	0	0	4	4
Bacteria	no rank	Proteobacteria	Alphaproteobacteria	Holosporales	Caedimonadaceae	Candidatus Nucleicultrix	1	0	1	0	0	8	8
Bacteria	no rank	Proteobacteria	Alphaproteobacteria	Holosporales	Candidatus Paracaedibacteraceae	Candidatus Finniella	1	0	1	0	0	1	1
Bacteria	no rank	Proteobacteria	Alphaproteobacteria	Holosporales	Candidatus Paracaedibacteraceae	Candidatus Odyssella	1	0	1	0	0	3	3
Bacteria	no rank	Proteobacteria	Alphaproteobacteria	Holosporales	Candidatus Paracaedibacteraceae	Candidatus Paracaedibacter	2	0	2	0	0	3	3
Bacteria	no rank	Proteobacteria	Alphaproteobacteria	Holosporales	Holosporaceae	no rank	1	0	1	0	0	1	1
Bacteria	no rank	Proteobacteria	Alphaproteobacteria	Holosporales	no rank	no rank	2	0	2	0	0	6	6
Bacteria	no rank	Proteobacteria	Alphaproteobacteria	Kiloniellales	Kiloniellaceae	Kiloniella	7	0	7	0	2	83	83
Bacteria	no rank	Proteobacteria	Alphaproteobacteria	Kordiimonadales	Kordiimonadaceae	Eilatimonas	1	0	1	0	0	10	10
Bacteria	no rank	Proteobacteria	Alphaproteobacteria	Kordiimonadales	Kordiimonadaceae	Kordiimonas	5	0	5	0	1	62	59
Bacteria	no rank	Proteobacteria	Alphaproteobacteria	Kordiimonadales	no rank	no rank	2	0	2	0	0	16	16
Bacteria	no rank	Proteobacteria	Alphaproteobacteria	Magnetococcales	Candidatus Magnetaquicoccaceae	Candidatus Magnetaquicoccus	1	0	1	0	0	27	27
Bacteria	no rank	Proteobacteria	Alphaproteobacteria	Magnetococcales	Magnetococcaceae	Magnetococcus	1	0	1	0	0	43	43
Bacteria	no rank	Proteobacteria	Alphaproteobacteria	Magnetococcales	Magnetococcaceae	Magnetofaba	1	0	1	0	0	53	53
Bacteria	no rank	Proteobacteria	Alphaproteobacteria	Minwuiales	Minwuiaceae	Minwuia	2	0	2	0	0	18	18
Bacteria	no rank	Proteobacteria	Alphaproteobacteria	Parvularculales	Parvularculaceae	Amphiplicatus	1	0	1	0	0	5	5
Bacteria	no rank	Proteobacteria	Alphaproteobacteria	Parvularculales	Parvularculaceae	Marinicaulis	1	0	1	0	1	12	12
Bacteria	no rank	Proteobacteria	Alphaproteobacteria	Parvularculales	Parvularculaceae	Parvularcula	3	0	3	0	2	14	14
Bacteria	no rank	Proteobacteria	Alphaproteobacteria	Parvularculales	Parvularculaceae	no rank	1	0	1	0	0	5	5
Bacteria	no rank	Proteobacteria	Alphaproteobacteria	Pelagibacterales	Pelagibacteraceae	no rank	1	0	1	0	0	1	1
Bacteria	no rank	Proteobacteria	Alphaproteobacteria	Rhizobiales	Aestuariivirgaceae	Aestuariivirga	1	0	1	0	0	5	5
Bacteria	no rank	Proteobacteria	Alphaproteobacteria	Rhizobiales	Ancalomicrobiaceae	Siculibacillus	1	0	1	0	0	24	24
Bacteria	no rank	Proteobacteria	Alphaproteobacteria	Rhizobiales	Aurantimonadaceae	Aurantimonas	8	0	8	0	1	238	238
Bacteria	no rank	Proteobacteria	Alphaproteobacteria	Rhizobiales	Aurantimonadaceae	Aureimonas	21	0	21	0	3	643	643
Bacteria	no rank	Proteobacteria	Alphaproteobacteria	Rhizobiales	Aurantimonadaceae	Consotaella	1	0	1	0	0	26	26
Bacteria	no rank	Proteobacteria	Alphaproteobacteria	Rhizobiales	Aurantimonadaceae	Fulvimarina	4	0	4	0	1	90	90
Bacteria	no rank	Proteobacteria	Alphaproteobacteria	Rhizobiales	Aurantimonadaceae	Jiella	1	0	1	0	1	28	27
Bacteria	no rank	Proteobacteria	Alphaproteobacteria	Rhizobiales	Aurantimonadaceae	Mangrovicella	1	0	1	0	1	35	35
Bacteria	no rank	Proteobacteria	Alphaproteobacteria	Rhizobiales	Aurantimonadaceae	Martelella	9	0	9	0	0	179	179
Bacteria	no rank	Proteobacteria	Alphaproteobacteria	Rhizobiales	Bartonellaceae	Bartonella	127	0	127	0	0	128	128
Bacteria	no rank	Proteobacteria	Alphaproteobacteria	Rhizobiales	Beijerinckiaceae	Beijerinckia	3	0	3	0	0	26	26
Bacteria	no rank	Proteobacteria	Alphaproteobacteria	Rhizobiales	Beijerinckiaceae	Methylocapsa	3	0	3	0	0	10	10
Bacteria	no rank	Proteobacteria	Alphaproteobacteria	Rhizobiales	Beijerinckiaceae	Methylocella	3	0	3	0	1	23	23
Bacteria	no rank	Proteobacteria	Alphaproteobacteria	Rhizobiales	Beijerinckiaceae	Methyloferula	1	0	1	0	0	10	10
Bacteria	no rank	Proteobacteria	Alphaproteobacteria	Rhizobiales	Beijerinckiaceae	Methylovirgula	3	0	3	0	2	37	37
Bacteria	no rank	Proteobacteria	Alphaproteobacteria	Rhizobiales	Beijerinckiaceae	Rhodoblastus	4	0	4	0	0	92	92
Bacteria	no rank	Proteobacteria	Alphaproteobacteria	Rhizobiales	Beijerinckiaceae	no rank	6	0	6	0	0	35	35
Bacteria	no rank	Proteobacteria	Alphaproteobacteria	Rhizobiales	Bradyrhizobiaceae	Afipia	24	0	24	0	17	460	460
Bacteria	no rank	Proteobacteria	Alphaproteobacteria	Rhizobiales	Bradyrhizobiaceae	Bosea	42	0	42	0	13	794	794
Bacteria	no rank	Proteobacteria	Alphaproteobacteria	Rhizobiales	Bradyrhizobiaceae	Bradyrhizobium	237	0	237	0	104	7361	7347
Bacteria	no rank	Proteobacteria	Alphaproteobacteria	Rhizobiales	Bradyrhizobiaceae	Nitrobacter	7	0	7	0	4	67	67
Bacteria	no rank	Proteobacteria	Alphaproteobacteria	Rhizobiales	Bradyrhizobiaceae	Oligotropha	3	0	3	0	3	62	62
Bacteria	no rank	Proteobacteria	Alphaproteobacteria	Rhizobiales	Bradyrhizobiaceae	Rhodopseudomonas	26	0	26	0	4	805	805
Bacteria	no rank	Proteobacteria	Alphaproteobacteria	Rhizobiales	Bradyrhizobiaceae	Tardiphaga	10	0	10	0	2	350	350
Bacteria	no rank	Proteobacteria	Alphaproteobacteria	Rhizobiales	Bradyrhizobiaceae	Variibacter	2	0	2	0	0	42	42
Bacteria	no rank	Proteobacteria	Alphaproteobacteria	Rhizobiales	Bradyrhizobiaceae	no rank	8	0	8	0	1	171	171
Bacteria	no rank	Proteobacteria	Alphaproteobacteria	Rhizobiales	Brucellaceae	Brucella	762	0	762	0	0	6700	6699
Bacteria	no rank	Proteobacteria	Alphaproteobacteria	Rhizobiales	Brucellaceae	Falsochrobactrum	2	0	2	0	0	19	19
Bacteria	no rank	Proteobacteria	Alphaproteobacteria	Rhizobiales	Brucellaceae	Mycoplana	1	0	1	0	1	25	25
Bacteria	no rank	Proteobacteria	Alphaproteobacteria	Rhizobiales	Brucellaceae	Ochrobactrum	111	0	111	0	29	1794	1794
Bacteria	no rank	Proteobacteria	Alphaproteobacteria	Rhizobiales	Brucellaceae	Pseudochrobactrum	4	0	4	0	1	46	46
Bacteria	no rank	Proteobacteria	Alphaproteobacteria	Rhizobiales	Brucellaceae	no rank	1	0	1	0	1	21	21
Bacteria	no rank	Proteobacteria	Alphaproteobacteria	Rhizobiales	Chelatococcaceae	Camelimonas	1	0	1	0	0	3	3
Bacteria	no rank	Proteobacteria	Alphaproteobacteria	Rhizobiales	Chelatococcaceae	Chelatococcus	8	0	8	0	0	104	104
Bacteria	no rank	Proteobacteria	Alphaproteobacteria	Rhizobiales	Cohaesibacteraceae	Breoghania	2	0	2	0	0	46	46
Bacteria	no rank	Proteobacteria	Alphaproteobacteria	Rhizobiales	Cohaesibacteraceae	Cohaesibacter	7	0	7	0	1	187	187
Bacteria	no rank	Proteobacteria	Alphaproteobacteria	Rhizobiales	Hyphomicrobiaceae	Aquabacter	2	0	2	0	1	46	46
Bacteria	no rank	Proteobacteria	Alphaproteobacteria	Rhizobiales	Hyphomicrobiaceae	Arsenicitalea	1	0	1	0	0	21	21
Bacteria	no rank	Proteobacteria	Alphaproteobacteria	Rhizobiales	Hyphomicrobiaceae	Blastochloris	4	0	4	0	0	56	56
Bacteria	no rank	Proteobacteria	Alphaproteobacteria	Rhizobiales	Hyphomicrobiaceae	Cucumibacter	1	0	1	0	0	15	15
Bacteria	no rank	Proteobacteria	Alphaproteobacteria	Rhizobiales	Hyphomicrobiaceae	Devosia	39	0	39	0	7	897	897
Bacteria	no rank	Proteobacteria	Alphaproteobacteria	Rhizobiales	Hyphomicrobiaceae	Dichotomicrobium	1	0	1	0	0	1	1
Bacteria	no rank	Proteobacteria	Alphaproteobacteria	Rhizobiales	Hyphomicrobiaceae	Filomicrobium	3	0	3	0	0	33	33
Bacteria	no rank	Proteobacteria	Alphaproteobacteria	Rhizobiales	Hyphomicrobiaceae	Hyphomicrobium	22	0	22	0	3	222	222
Bacteria	no rank	Proteobacteria	Alphaproteobacteria	Rhizobiales	Hyphomicrobiaceae	Maritalea	3	0	3	0	0	56	56
Bacteria	no rank	Proteobacteria	Alphaproteobacteria	Rhizobiales	Hyphomicrobiaceae	Pelagibacterium	12	0	12	0	2	260	256
Bacteria	no rank	Proteobacteria	Alphaproteobacteria	Rhizobiales	Hyphomicrobiaceae	Prosthecomicrobium	2	0	2	0	0	36	36
Bacteria	no rank	Proteobacteria	Alphaproteobacteria	Rhizobiales	Hyphomicrobiaceae	Rhodomicrobium	5	0	5	0	0	23	23
Bacteria	no rank	Proteobacteria	Alphaproteobacteria	Rhizobiales	Hyphomicrobiaceae	Rhodoplanes	6	0	6	0	2	125	125
Bacteria	no rank	Proteobacteria	Alphaproteobacteria	Rhizobiales	Hyphomicrobiaceae	Youhaiella	1	0	1	0	0	22	22
Bacteria	no rank	Proteobacteria	Alphaproteobacteria	Rhizobiales	Hyphomicrobiaceae	no rank	2	0	2	0	0	12	12
Bacteria	no rank	Proteobacteria	Alphaproteobacteria	Rhizobiales	Mabikibacteraceae	Mabikibacter	1	0	1	0	0	20	20
Bacteria	no rank	Proteobacteria	Alphaproteobacteria	Rhizobiales	Methylobacteriaceae	Enterovirga	1	0	1	0	0	25	25
Bacteria	no rank	Proteobacteria	Alphaproteobacteria	Rhizobiales	Methylobacteriaceae	Methylobacterium	131	1	131	1	32	3395	3394
Bacteria	no rank	Proteobacteria	Alphaproteobacteria	Rhizobiales	Methylobacteriaceae	Methylorubrum	18	0	18	0	7	484	484
Bacteria	no rank	Proteobacteria	Alphaproteobacteria	Rhizobiales	Methylobacteriaceae	Microvirga	17	0	17	0	2	265	265
Bacteria	no rank	Proteobacteria	Alphaproteobacteria	Rhizobiales	Methylobacteriaceae	Neomegalonema	1	0	1	0	0	3	3
Bacteria	no rank	Proteobacteria	Alphaproteobacteria	Rhizobiales	Methylocystaceae	Hansschlegelia	2	0	2	0	0	49	49
Bacteria	no rank	Proteobacteria	Alphaproteobacteria	Rhizobiales	Methylocystaceae	Methylocystis	16	0	16	0	4	116	116
Bacteria	no rank	Proteobacteria	Alphaproteobacteria	Rhizobiales	Methylocystaceae	Methylopila	3	0	3	0	0	59	59
Bacteria	no rank	Proteobacteria	Alphaproteobacteria	Rhizobiales	Methylocystaceae	Methylosinus	10	0	10	0	2	137	137
Bacteria	no rank	Proteobacteria	Alphaproteobacteria	Rhizobiales	Methylocystaceae	Oharaeibacter	1	0	1	0	0	23	23
Bacteria	no rank	Proteobacteria	Alphaproteobacteria	Rhizobiales	Methylocystaceae	Pleomorphomonas	7	0	7	0	1	242	218
Bacteria	no rank	Proteobacteria	Alphaproteobacteria	Rhizobiales	Methylocystaceae	Terasakiella	3	0	3	0	0	108	108
Bacteria	no rank	Proteobacteria	Alphaproteobacteria	Rhizobiales	Notoacmeibacteraceae	Notoacmeibacter	2	0	2	0	1	41	41
Bacteria	no rank	Proteobacteria	Alphaproteobacteria	Rhizobiales	Phyllobacteriaceae	Aliihoeflea	1	0	1	0	0	16	16
Bacteria	no rank	Proteobacteria	Alphaproteobacteria	Rhizobiales	Phyllobacteriaceae	Aminobacter	11	0	11	0	4	254	254
Bacteria	no rank	Proteobacteria	Alphaproteobacteria	Rhizobiales	Phyllobacteriaceae	Aquamicrobium	4	0	4	0	2	70	70
Bacteria	no rank	Proteobacteria	Alphaproteobacteria	Rhizobiales	Phyllobacteriaceae	Chelativorans	2	0	2	0	1	21	21
Bacteria	no rank	Proteobacteria	Alphaproteobacteria	Rhizobiales	Phyllobacteriaceae	Hoeflea	9	0	9	0	2	234	234
Bacteria	no rank	Proteobacteria	Alphaproteobacteria	Rhizobiales	Phyllobacteriaceae	Mesorhizobium	929	1	925	1	203	16121	16119
Bacteria	no rank	Proteobacteria	Alphaproteobacteria	Rhizobiales	Phyllobacteriaceae	Nitratireductor	14	0	14	0	1	238	238
Bacteria	no rank	Proteobacteria	Alphaproteobacteria	Rhizobiales	Phyllobacteriaceae	Oceaniradius	1	0	1	0	0	11	11
Bacteria	no rank	Proteobacteria	Alphaproteobacteria	Rhizobiales	Phyllobacteriaceae	Oricola	1	0	1	0	0	19	19
Bacteria	no rank	Proteobacteria	Alphaproteobacteria	Rhizobiales	Phyllobacteriaceae	Paramesorhizobium	1	0	1	0	0	15	15
Bacteria	no rank	Proteobacteria	Alphaproteobacteria	Rhizobiales	Phyllobacteriaceae	Phyllobacterium	22	0	22	0	3	355	355
Bacteria	no rank	Proteobacteria	Alphaproteobacteria	Rhizobiales	Phyllobacteriaceae	Pseudaminobacter	4	0	4	0	1	47	47
Bacteria	no rank	Proteobacteria	Alphaproteobacteria	Rhizobiales	Phyllobacteriaceae	Pseudohoeflea	1	0	1	0	1	20	20
Bacteria	no rank	Proteobacteria	Alphaproteobacteria	Rhizobiales	Phyllobacteriaceae	Roseitalea	1	0	1	0	0	11	11
Bacteria	no rank	Proteobacteria	Alphaproteobacteria	Rhizobiales	Phyllobacteriaceae	Zhengella	1	0	1	0	0	17	17
Bacteria	no rank	Proteobacteria	Alphaproteobacteria	Rhizobiales	Phyllobacteriaceae	no rank	3	0	3	0	0	43	43
Bacteria	no rank	Proteobacteria	Alphaproteobacteria	Rhizobiales	Rhizobiaceae	Agrobacterium	189	0	188	0	41	5061	5059
Bacteria	no rank	Proteobacteria	Alphaproteobacteria	Rhizobiales	Rhizobiaceae	Ciceribacter	2	0	2	0	1	58	58
Bacteria	no rank	Proteobacteria	Alphaproteobacteria	Rhizobiales	Rhizobiaceae	Ensifer	53	0	53	0	9	1561	1561
Bacteria	no rank	Proteobacteria	Alphaproteobacteria	Rhizobiales	Rhizobiaceae	Georhizobium	1	0	1	0	0	23	23
Bacteria	no rank	Proteobacteria	Alphaproteobacteria	Rhizobiales	Rhizobiaceae	Kaistia	4	0	4	0	2	84	84
Bacteria	no rank	Proteobacteria	Alphaproteobacteria	Rhizobiales	Rhizobiaceae	Liberibacter	25	0	25	0	0	54	54
Bacteria	no rank	Proteobacteria	Alphaproteobacteria	Rhizobiales	Rhizobiaceae	Neorhizobium	21	0	21	0	3	691	691
Bacteria	no rank	Proteobacteria	Alphaproteobacteria	Rhizobiales	Rhizobiaceae	Pararhizobium	4	0	4	0	2	109	109
Bacteria	no rank	Proteobacteria	Alphaproteobacteria	Rhizobiales	Rhizobiaceae	Pseudorhizobium	2	0	2	0	0	65	65
Bacteria	no rank	Proteobacteria	Alphaproteobacteria	Rhizobiales	Rhizobiaceae	Rhizobium	622	6	622	6	183	22414	22414
Bacteria	no rank	Proteobacteria	Alphaproteobacteria	Rhizobiales	Rhizobiaceae	Shinella	14	0	14	0	3	471	471
Bacteria	no rank	Proteobacteria	Alphaproteobacteria	Rhizobiales	Rhizobiaceae	Sinorhizobium	329	0	329	0	86	6247	6222
Bacteria	no rank	Proteobacteria	Alphaproteobacteria	Rhizobiales	Rhizobiaceae	no rank	6	0	6	0	1	104	104
Bacteria	no rank	Proteobacteria	Alphaproteobacteria	Rhizobiales	Rhodobiaceae	Afifella	4	0	4	0	2	78	78
Bacteria	no rank	Proteobacteria	Alphaproteobacteria	Rhizobiales	Rhodobiaceae	Amorphus	1	0	1	0	0	28	28
Bacteria	no rank	Proteobacteria	Alphaproteobacteria	Rhizobiales	Rhodobiaceae	Candidatus Phaeomarinobacter	1	0	1	0	0	8	8
Bacteria	no rank	Proteobacteria	Alphaproteobacteria	Rhizobiales	Rhodobiaceae	Lutibaculum	1	0	1	0	0	17	17
Bacteria	no rank	Proteobacteria	Alphaproteobacteria	Rhizobiales	Rhodobiaceae	Parvibaculum	1	0	1	0	1	8	8
Bacteria	no rank	Proteobacteria	Alphaproteobacteria	Rhizobiales	Rhodobiaceae	Rhodobium	1	0	1	0	0	22	22
Bacteria	no rank	Proteobacteria	Alphaproteobacteria	Rhizobiales	Rhodobiaceae	Rhodoligotrophos	2	0	2	0	1	29	29
Bacteria	no rank	Proteobacteria	Alphaproteobacteria	Rhizobiales	Rhodobiaceae	Roseospirillum	1	0	1	0	0	30	30
Bacteria	no rank	Proteobacteria	Alphaproteobacteria	Rhizobiales	Rhodobiaceae	Tepidamorphus	1	0	1	0	0	12	12
Bacteria	no rank	Proteobacteria	Alphaproteobacteria	Rhizobiales	Rhodobiaceae	Tepidicaulis	2	0	2	0	0	16	16
Bacteria	no rank	Proteobacteria	Alphaproteobacteria	Rhizobiales	Rhodobiaceae	no rank	3	0	3	0	1	31	31
Bacteria	no rank	Proteobacteria	Alphaproteobacteria	Rhizobiales	Roseiarcaceae	Roseiarcus	1	0	1	0	1	6	6
Bacteria	no rank	Proteobacteria	Alphaproteobacteria	Rhizobiales	Salinarimonadaceae	Salinarimonas	1	0	1	0	0	16	16
Bacteria	no rank	Proteobacteria	Alphaproteobacteria	Rhizobiales	Salinarimonadaceae	no rank	3	0	3	0	0	45	45
Bacteria	no rank	Proteobacteria	Alphaproteobacteria	Rhizobiales	Xanthobacteraceae	Ancylobacter	4	0	4	0	0	8	8
Bacteria	no rank	Proteobacteria	Alphaproteobacteria	Rhizobiales	Xanthobacteraceae	Azorhizobium	8	0	8	0	0	137	137
Bacteria	no rank	Proteobacteria	Alphaproteobacteria	Rhizobiales	Xanthobacteraceae	Labrys	2	0	2	0	0	19	19
Bacteria	no rank	Proteobacteria	Alphaproteobacteria	Rhizobiales	Xanthobacteraceae	Pseudolabrys	4	0	4	0	0	82	82
Bacteria	no rank	Proteobacteria	Alphaproteobacteria	Rhizobiales	Xanthobacteraceae	Pseudoxanthobacter	1	0	1	0	0	20	20
Bacteria	no rank	Proteobacteria	Alphaproteobacteria	Rhizobiales	Xanthobacteraceae	Starkeya	4	0	4	0	1	96	96
Bacteria	no rank	Proteobacteria	Alphaproteobacteria	Rhizobiales	Xanthobacteraceae	Xanthobacter	7	0	7	0	3	106	106
Bacteria	no rank	Proteobacteria	Alphaproteobacteria	Rhizobiales	Xanthobacteraceae	no rank	2	0	2	0	0	15	15
Bacteria	no rank	Proteobacteria	Alphaproteobacteria	Rhizobiales	no rank	Alsobacter	1	0	1	0	0	6	6
Bacteria	no rank	Proteobacteria	Alphaproteobacteria	Rhizobiales	no rank	Bauldia	1	0	1	0	0	18	18
Bacteria	no rank	Proteobacteria	Alphaproteobacteria	Rhizobiales	no rank	Candidatus Tokpelaia	5	0	5	0	0	5	5
Bacteria	no rank	Proteobacteria	Alphaproteobacteria	Rhizobiales	no rank	Hartmannibacter	1	0	1	0	1	25	25
Bacteria	no rank	Proteobacteria	Alphaproteobacteria	Rhizobiales	no rank	Methylobrevis	1	0	1	0	0	16	16
Bacteria	no rank	Proteobacteria	Alphaproteobacteria	Rhizobiales	no rank	Methyloceanibacter	6	0	6	0	2	73	73
Bacteria	no rank	Proteobacteria	Alphaproteobacteria	Rhizobiales	no rank	Methyloligella	1	0	1	0	0	14	14
Bacteria	no rank	Proteobacteria	Alphaproteobacteria	Rhizobiales	no rank	Mongoliimonas	1	0	1	0	0	25	25
Bacteria	no rank	Proteobacteria	Alphaproteobacteria	Rhizobiales	no rank	Pseudorhodoplanes	2	0	2	0	0	34	34
Bacteria	no rank	Proteobacteria	Alphaproteobacteria	Rhizobiales	no rank	no rank	881	1	881	1	149	25508	25507
Bacteria	no rank	Proteobacteria	Alphaproteobacteria	Rhodobacterales	Acuticoccaceae	Acuticoccus	4	0	4	0	1	69	69
Bacteria	no rank	Proteobacteria	Alphaproteobacteria	Rhodobacterales	Hyphomonadaceae	Euryhalocaulis	1	0	1	0	0	4	4
Bacteria	no rank	Proteobacteria	Alphaproteobacteria	Rhodobacterales	Hyphomonadaceae	Glycocaulis	2	0	2	0	0	14	14
Bacteria	no rank	Proteobacteria	Alphaproteobacteria	Rhodobacterales	Hyphomonadaceae	Henriciella	10	0	10	0	1	147	147
Bacteria	no rank	Proteobacteria	Alphaproteobacteria	Rhodobacterales	Hyphomonadaceae	Hirschia	2	0	2	0	1	16	16
Bacteria	no rank	Proteobacteria	Alphaproteobacteria	Rhodobacterales	Hyphomonadaceae	Hyphobacterium	1	0	1	0	0	4	4
Bacteria	no rank	Proteobacteria	Alphaproteobacteria	Rhodobacterales	Hyphomonadaceae	Hyphomonas	25	0	25	0	8	288	287
Bacteria	no rank	Proteobacteria	Alphaproteobacteria	Rhodobacterales	Hyphomonadaceae	Litorimonas	1	0	1	0	0	3	3
Bacteria	no rank	Proteobacteria	Alphaproteobacteria	Rhodobacterales	Hyphomonadaceae	Maricaulis	5	0	5	0	1	46	46
Bacteria	no rank	Proteobacteria	Alphaproteobacteria	Rhodobacterales	Hyphomonadaceae	Marinicauda	3	0	3	0	1	17	17
Bacteria	no rank	Proteobacteria	Alphaproteobacteria	Rhodobacterales	Hyphomonadaceae	Oceanicaulis	6	0	6	0	0	42	42
Bacteria	no rank	Proteobacteria	Alphaproteobacteria	Rhodobacterales	Hyphomonadaceae	Ponticaulis	1	0	1	0	0	5	5
Bacteria	no rank	Proteobacteria	Alphaproteobacteria	Rhodobacterales	Hyphomonadaceae	Robiginitomaculum	11	1	11	1	1	42	42
[truncated: 1,290 more rows]
